# Supplementary material for: Deoxygenative trifluoromethylthiolation of carboxylic acids
Source: PubMed Central journal article supplement (PMC6979494; doi:10.1039/c9sc03396c), 2019-08-26
Supplement: SC-010-C9SC03396C-s001.pdf [file SC-010-C9SC03396C-s001.pdf]

## Supporting Information

### Deoxygenative Trifluoromethylthiolation of Carboxylic Acids

Runze Mao, Srikrishna Bera, Alexis Cheseaux, and Xile Hu\*

Laboratory of Inorganic Synthesis and Catalysis, Institute of Chemical Sciences and Engineering, École Polytechnique Fédérale de Lausanne (EPFL), ISIC-LSCI, BCH 3305, Lausanne 1015, Switzerland

#### Table of contents

|                            |      |
|----------------------------|------|
| <b>1. Methods</b> .....    | S2   |
| <b>2. Tables</b> .....     | S30  |
| <b>3. Figures</b> .....    | S35  |
| <b>4. References</b> ..... | S136 |

# Methods

## General Analytical Information

Nuclear Magnetic Resonance spectra were recorded on a Bruker Avance 400 MHz instruments at ambient temperature. All  $^1\text{H}$  NMR spectra were measured in part per million (ppm) relative to the signals of tetramethylsilane (TMS, 0.00 ppm) added into the deuterated chloroform ( $\text{CDCl}_3$ , 7.26 ppm), deuterated dichloromethane ( $\text{CD}_2\text{Cl}_2$ , 5.32 ppm), unless otherwise stated.<sup>1</sup> Data for  $^1\text{H}$  NMR were reported as follows: chemical shift, multiplicity (s = singlet, d = doublet, t = triplet, q = quartet, quint = quintet, m = multiplet, dd = doublet of doublets, dt = doublet of triplets, td = triplet of doublets, and br = broad signal), coupling constants, and integration. All  $^{13}\text{C}$  NMR spectra were reported in ppm relative to  $\text{CDCl}_3$  (77.16 ppm),  $\text{CD}_2\text{Cl}_2$  (53.84 ppm), unless otherwise stated,<sup>1</sup> and were obtained with complete  $^1\text{H}$  decoupling. All  $^{19}\text{F}$  NMR spectra were reported in ppm unless otherwise stated, and were obtained with complete  $^1\text{H}$  decoupling. All GC analyses were performed on a Perkin-Elmer Clarus 400 GC system with a FID detector. All GC-MS analyses were performed on an Agilent Technologies 7890A GC system equipped with a 5975C MS detector. High-resolution mass spectra (HRMS) by electrospray ionization (ESI), atmospheric pressure chemical ionization (APCI) and atmospheric pressure photoionization (APPI) method were performed at the EPFL ISIC Mass Spectroscopy Service.

## General Manipulation Considerations

Flash column chromatography was performed using silica gel (Silicycle, ultra-pure grade). The eluents for column chromatography were presented as ratios of solvent volumes. Yields reported in the publication are of isolated materials unless otherwise noted. All new products were characterized by  $^1\text{H}$ ,  $^{13}\text{C}$  and  $^{19}\text{F}$  NMR spectroscopy as well as high-resolution mass spectrometry (HRMS), and reported with physical state and the eluents for column chromatography were presented as ratios of solvent volumes. All known products were characterized by  $^1\text{H}$ ,  $^{13}\text{C}$  and  $^{19}\text{F}$  NMR spectroscopies and the spectra were compared with the reported data.

### **General procedure for deoxygenative trifluoromethylthiolation of carboxylic acids**

Two oven-dried 15 mL re-sealable screw-cap vials (oven-dried) were both equipped with a Teflon-coated magnetic stirring bar (oven-dried), and were transferred into glovebox. One vial was sequentially charged with carboxylic acid (1.0 equiv., 0.30 mmol), triphenylphosphine (Ph<sub>3</sub>P, 1.1 equiv., 0.33 mmol, 87 mg) and anhydrous Tetrahydrofuran (THF, 0.5 mL) in glovebox and the mixture was stirred vigorously. Another vial was sequentially charged with *N*-(trifluoromethylthio)phthalimide (1.3 equiv., 0.39 mmol, 96 mg), anhydrous FeCl<sub>3</sub> (5 mol%, 2.4 mg), and anhydrous THF (1 mL) in the glovebox. Then the 2 vials were transferred out of the glovebox. The solution of the second vial was added into the first one dropwise under nitrogen at room temperature. The resulting mixture was stirred at room temperature for 30 minutes during which time the color of the mixture change from red to bright yellow. After the reaction, the solvent was blown away by dry air and the reaction mixture was diluted with dichloromethane and was purified by flash column chromatography using a solvent mixture (ethyl acetate, hexanes or diethyl ether, *n*-pentane) as an eluent to afford the purified product.

Notice: Because of the high volatility of certain products, their isolated yields were low.

### ***S*-(trifluoromethyl) [1,1'-biphenyl]-4-carbothioate (3a)**

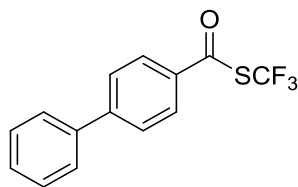

Following the General Procedure with the corresponding carboxylic acid (0.3 mmol). The crude product purified by flash column chromatography, using hexanes/EA = 30/1 (v/v) as an eluent, to yield the title compound **3a** (80 mg) in 95%.

**<sup>1</sup>H NMR** (400 MHz, Chloroform-*d*): δ 7.98 – 7.88 (m, 2H), 7.75 – 7.70 (m, 2H), 7.65 – 7.60 (m, 2H), 7.52 – 7.42 (m, 3H).

**<sup>13</sup>C NMR** (101 MHz, Chloroform-*d*): δ 183.25, 148.40, 139.64, 134.24 (q, *J* = 2.7 Hz), 129.64, 129.32, 128.77, 128.61 (q, *J* = 309.6 Hz), 128.26, 127.83.

**<sup>19</sup>F NMR** (376 MHz, Chloroform-*d*): δ -39.50.

**Physical State:** white solid.

**HRMS (EI)** *m/z*: [M]<sup>+</sup> Calcd for C<sub>14</sub>H<sub>9</sub>F<sub>3</sub>OS<sup>+</sup> 282.0321, Found 282.0321.

The spectra were consistent with the spectrum reported in the literature.<sup>2</sup>

### ***S*-(trifluoromethyl) 4-methoxybenzothioate (3b)**

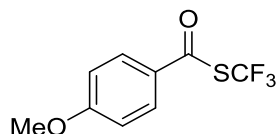

Following the General Procedure with the corresponding carboxylic acid (0.3 mmol). The crude product purified by flash column chromatography, using hexanes/EA = 30/1 (v/v) as an eluent, to yield the title compound **3b** (64 mg) in 90%.

**<sup>1</sup>H NMR** (400 MHz, Chloroform-*d*): δ 7.82 (d, *J* = 8.9 Hz, 2H), 6.96 (d, *J* = 8.9 Hz, 2H), 3.89 (s, 3H).

**<sup>13</sup>C NMR** (101 MHz, Chloroform-*d*): δ 181.48, 165.07, 130.09, 128.20 (q, *J* = 309.2 Hz), 127.82 (q, *J* = 2.7 Hz), 114.41, 55.70.

**<sup>19</sup>F NMR** (376 MHz, Chloroform-*d*): δ -39.43.

**Physical State:** pale brown oil.

**HRMS (ESI/QTOF)** *m/z*: [M + H]<sup>+</sup> Calcd for C<sub>10</sub>H<sub>7</sub>F<sub>3</sub>O<sub>2</sub>S<sup>+</sup> 237.0192, Found 237.0193.

The spectra were consistent with the spectrum reported in the literature.<sup>2</sup>

### **S-(trifluoromethyl) 2-methoxybenzothioate (3c)**

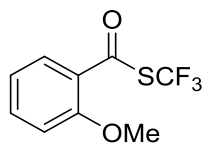

Following the General Procedure with the corresponding carboxylic acid (0.3 mmol). The crude product purified by flash column chromatography, using *n*-pentane/diethyl ether = 30/1 (v/v) as an eluent, to yield the title compound **3c** (60 mg) in 85%.

**<sup>1</sup>H NMR** (400 MHz, Chloroform-d): δ 7.89 (dd, *J* = 7.9, 1.8 Hz, 1H), 7.58 (ddd, *J* = 8.2, 7.3, 1.8 Hz, 1H), 7.10 – 7.05 (m, 1H), 7.03 (d, *J* = 8.4 Hz, 1H), 3.99 (s, 3H).

**<sup>13</sup>C NMR** (101 MHz, Chloroform-d): δ 182.01, 159.32, 136.03, 130.37, 128.31 (q, *J* = 310.1 Hz), 124.09 (q, *J* = 2.6 Hz), 121.29, 112.30, 56.01.

**<sup>19</sup>F NMR** (376 MHz, Chloroform-d): δ -42.13.

**Physical State:** colorless oil.

**HRMS (ESI/QTOF)** *m/z*: [M + H]<sup>+</sup> Calcd for C<sub>10</sub>H<sub>7</sub>F<sub>3</sub>O<sub>2</sub>S<sup>+</sup> 237.0192, Found 237.0192.

The spectra were consistent with the spectrum reported in the literature.<sup>3</sup>

### **S-(trifluoromethyl) 2-methoxybenzothioate (3d)**

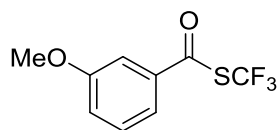

Following the General Procedure with the corresponding carboxylic acid (0.3 mmol). The crude product purified by flash column chromatography, using *n*-pentane/diethyl ether = 30/1 (v/v) as an eluent, to yield the title compound **3d** (57 mg) in 81%.

**<sup>1</sup>H NMR** (400 MHz, Chloroform-d): δ 7.46 – 7.39 (m, 2H), 7.36 (s, 1H), 7.22 – 7.18 (m, 1H), 3.86 (s, 3H).

**<sup>13</sup>C NMR** (101 MHz, Chloroform-d): δ 183.36, 160.27, 136.54, 130.36, 128.14 (q, *J* = 309.6 Hz), 121.67, 120.28, 111.93, 55.74.

**<sup>19</sup>F NMR** (376 MHz, Chloroform-d): δ -39.77.

**Physical State:** colorless oil.

**HRMS (ESI/QTOF)** *m/z*: [M + Na]<sup>+</sup> Calcd for C<sub>9</sub>H<sub>7</sub>F<sub>3</sub>O<sub>2</sub>SNa<sup>+</sup> 259.0017, Found 259.0018.

The spectra were consistent with the spectrum reported in the literature.<sup>3</sup>

### **S-(trifluoromethyl) 2-ethylbenzothioate (3e)**

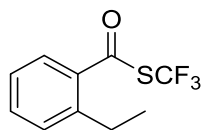

Following the General Procedure with the corresponding carboxylic acid (0.3 mmol). The crude product purified by flash column chromatography, using *n*-pentane/diethyl ether = 30/1 (v/v) as an eluent, to yield the title compound **3e** (48 mg) in 69%.

**<sup>1</sup>H NMR** (400 MHz, Chloroform-d):  $\delta$  7.67 (dd,  $J = 7.8, 1.4$  Hz, 1H), 7.52 (td,  $J = 7.6$  Hz, 1.4 Hz, 1H), 7.32 (ddd,  $J = 15.2, 7.7, 1.2$  Hz, 2H), 2.88 (q,  $J = 7.5$  Hz, 2H), 1.24 (td,  $J = 7.5, 1.1$  Hz, 4H).

**<sup>13</sup>C NMR** (101 MHz, Chloroform-d):  $\delta$  184.84, 144.67, 134.65 (q,  $J = 2.7$  Hz), 133.67, 130.94, 128.74, 128.05 (q,  $J = 309.9$  Hz), 126.36, 26.97, 15.81.

**<sup>19</sup>F NMR** (376 MHz, Chloroform-d):  $\delta$  -40.61.

**Physical State:** yellowish oil.

**HRMS (APPI/LTQ-Orbitrap)**  $m/z$ :  $[M + H]^+$  Calcd for  $C_{10}H_{10}F_3OS^+$  235.0399, Found 235.0399.

The spectra were consistent with the spectrum reported in the literature.<sup>2</sup>

### **S-(trifluoromethyl) 4-(tert-butyl)benzothioate (3f)**

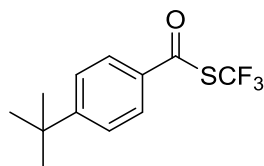

Following the General Procedure with the corresponding carboxylic acid (0.3 mmol). The crude product purified by flash column chromatography, using *n*-pentane/diethyl ether = 30/1 (v/v) as an eluent, to yield the title compound **3f** (56 mg) in 71%.

**<sup>1</sup>H NMR** (400 MHz, Chloroform-d):  $\delta$  7.87 – 7.72 (m, 2H), 7.59 – 7.45 (m, 2H), 1.35 (s, 9H).

**<sup>13</sup>C NMR** (101 MHz, Chloroform-d):  $\delta$  182.73, 159.30, 132.51 (q,  $J = 2.8$  Hz), 128.15 (q,  $J = 309.3$  Hz), 127.65, 126.19, 35.42, 30.96.

**<sup>19</sup>F NMR** (376 MHz, Chloroform-d):  $\delta$  -39.57.

**Physical State:** yellowish oil.

**HRMS (ESI/QTOF)**  $m/z$ :  $[M + Na]^+$  Calcd for  $C_{12}H_{13}F_3OSNa^+$  285.0537, Found 285.0534.

The spectra were consistent with the spectrum reported in the literature.<sup>2</sup>

### **S-(trifluoromethyl) 4-fluorobenzothioate (3g)**

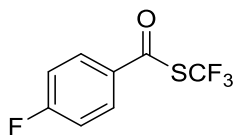

Following the General Procedure with the corresponding carboxylic acid (0.3 mmol). The crude product purified by flash column chromatography, using *n*-pentane/diethyl ether = 30/1 (v/v) as an eluent, to yield the title compound **3g** (41 mg) in 61%.

**<sup>1</sup>H NMR** (400 MHz, Chloroform-d): δ 7.90 (dd, *J* = 8.5, 5.1 Hz, 2H), 7.20 (t, *J* = 8.3 Hz, 2H).

**<sup>13</sup>C NMR** (101 MHz, Chloroform-d): δ 181.91, 168.23, 165.66, 131.62, 130.61, 130.51, 128.00 (q, *J* = 309.8 Hz), 116.84, 116.62.

**<sup>19</sup>F NMR** (376 MHz, Chloroform-d): δ -39.56, -101.01.

**Physical State:** yellowish oil.

**HRMS (APPI/LTQ-Orbitrap)** *m/z*: [M + H]<sup>+</sup> Calcd for C<sub>8</sub>H<sub>5</sub>F<sub>4</sub>OS<sup>+</sup> 224.9992; Found 224.9994.

The spectra were consistent with the spectrum reported in the literature.<sup>2</sup>

### **S-(trifluoromethyl) 4-chlorobenzothioate (3h)**

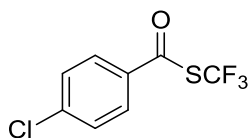

Following the General Procedure with the corresponding carboxylic acid (0.3 mmol). The crude product purified by flash column chromatography, using *n*-pentane/diethyl ether = 30/1 (v/v) as an eluent, to yield the title compound **3h** (47 mg) in 65%.

**<sup>1</sup>H NMR** (400 MHz, Chloroform-d): δ 7.80 (d, *J* = 8.2 Hz, 2H), 7.50 (d, *J* = 8.2 Hz, 2H).

**<sup>13</sup>C NMR** (101 MHz, Chloroform-d): δ 182.32, 141.90, 133.56 (q, *J* = 2.7 Hz), 129.75, 129.09, 127.95 (q, *J* = 310.0 Hz).

**<sup>19</sup>F NMR** (376 MHz, Chloroform-d): δ -39.53.

**Physical State:** yellowish oil.

**HRMS (APPI/LTQ-Orbitrap)** *m/z*: [M + H]<sup>+</sup> Calcd for C<sub>8</sub>H<sub>5</sub>F<sub>3</sub>ClOS<sup>+</sup> 240.9696; Found 240.9698.

The spectra were consistent with the spectrum reported in the literature.<sup>2</sup>

### ***S*-(trifluoromethyl) 4-bromobenzothioate (3i)**

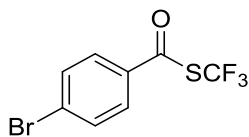

Following the General Procedure with the corresponding carboxylic acid (0.3 mmol). The crude product purified by flash column chromatography, using *n*-pentane/diethyl ether = 30/1 (v/v) as an eluent, to yield the title compound **3i** (68 mg) in 80%.

**<sup>1</sup>H NMR** (400 MHz, Chloroform-*d*): δ 7.75 – 7.62 (m, 4H).

**<sup>13</sup>C NMR** (101 MHz, Chloroform-*d*): δ 182.54, 133.98 (q, *J* = 2.7 Hz), 132.73, 130.63, 129.09, 127.91 (q, *J* = 309.9 Hz).

**<sup>19</sup>F NMR** (376 MHz, Chloroform-*d*): δ -39.54.

**Physical State:** yellowish solid.

**HRMS (APPI/LTQ-Orbitrap)** *m/z*: [M + H]<sup>+</sup> Calcd for C<sub>8</sub>H<sub>5</sub>BrF<sub>3</sub>OS<sup>+</sup> 284.9191; Found 284.9192.

The spectra were consistent with the spectrum reported in the literature.<sup>2</sup>

### ***S*-(trifluoromethyl) 4-iodobenzothioate (3j)**

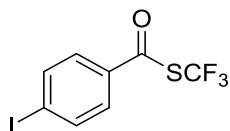

Following the General Procedure with the corresponding carboxylic acid (0.3 mmol). The crude product purified by flash column chromatography, using *n*-pentane/diethyl ether = 30/1 (v/v) as an eluent, to yield the title compound **3j** (75 mg) in 75%.

**<sup>1</sup>H NMR** (400 MHz, Chloroform-*d*): δ 7.95 – 7.87 (m, 2H), 7.63 – 7.55 (m, 2H).

**<sup>13</sup>C NMR** (101 MHz, Chloroform-*d*): δ 182.77, 138.57, 134.42, 134.39, 129.27, 128.71, 126.19, 103.38.

**<sup>19</sup>F NMR** (376 MHz, Chloroform-*d*): δ -39.53.

**Physical State:** white solid.

**HRMS (APPI/LTQ-Orbitrap)** *m/z*: [M + H]<sup>+</sup> Calcd for C<sub>8</sub>H<sub>5</sub>F<sub>3</sub>IOS<sup>+</sup> 332.9052; Found 332.9059.



### **S-(trifluoromethyl) 2-chlorobenzothioate (3k)**

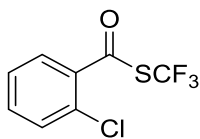

Following the General Procedure with the corresponding carboxylic acid (0.3 mmol). The crude product purified by flash column chromatography, using *n*-pentane/diethyl ether = 30/1 (v/v) as an eluent, to yield the title compound **3k** (44 mg) in 61%.

**<sup>1</sup>H NMR** (400 MHz, Chloroform-d): δ 7.73 – 7.64 (m, 1H), 7.56 – 7.48 (m, 2H), 7.45 – 7.35 (m, 1H).

**<sup>13</sup>C NMR** (101 MHz, Chloroform-d): δ 182.67, 134.78 (q, *J* = 2.6 Hz), 134.12, 131.91, 131.68, 129.67, 127.60 (q, *J* = 310.9 Hz), 127.28.

**<sup>19</sup>F NMR** (376 MHz, Chloroform-d): δ -40.55.

**Physical State:** yellowish oil.

**HRMS (APPI/LTQ-Orbitrap)** m/z: [M + H]<sup>+</sup> Calcd for C<sub>8</sub>H<sub>5</sub>F<sub>3</sub>ClOS<sup>+</sup> 240.9696; Found 240.9697.

The spectra were consistent with the spectrum reported in the literature.<sup>3</sup>

### **S-(trifluoromethyl) 2-bromobenzothioate (3l)**

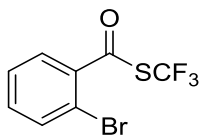

Following the General Procedure with the corresponding carboxylic acid (0.3 mmol). The crude product purified by flash column chromatography, using *n*-pentane/diethyl ether = 30/1 (v/v) as an eluent, to yield the title compound **3l** (64 mg) in 75%.

**<sup>1</sup>H NMR** (400 MHz, Chloroform-d): δ 7.79 – 7.67 (m, 1H), 7.67 – 7.58 (m, 1H), 7.48 – 7.40 (m, 2H).

**<sup>13</sup>C NMR** (101 MHz, Chloroform-d): δ 183.55 (q, *J* = 1.3 Hz), 136.84 (q, *J* = 2.8 Hz), 134.95, 134.02, 129.53, 127.80, 127.54 (q, *J* = 311.1 Hz), 119.62.

**<sup>19</sup>F NMR** (376 MHz, Chloroform-d): δ -40.51.

**Physical State:** yellowish oil.

**HRMS (APPI/LTQ-Orbitrap)** m/z: [M + H]<sup>+</sup> Calcd for C<sub>8</sub>H<sub>5</sub>BrF<sub>3</sub>OS<sup>+</sup> 284.9191; Found 284.9193.

### **S-(trifluoromethyl) 2-iodobenzothioate (3m)**

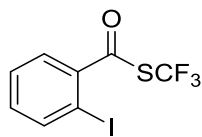

Following the General Procedure with the corresponding carboxylic acid (0.3 mmol). The crude product purified by flash column chromatography, using *n*-pentane/diethyl ether = 30/1 (v/v) as an eluent, to yield the title compound **3m** (71 mg) in 71%.

**<sup>1</sup>H NMR** (400 MHz, Chloroform-*d*): δ 8.01 (d, *J* = 8.0 Hz, 1H), 7.59 (dd, *J* = 7.9, 1.6 Hz, 1H), 7.51 – 7.41 (m, 1H), 7.27 – 7.23 (m, 1H).

**<sup>13</sup>C NMR** (101 MHz, Chloroform-*d*): δ 184.66, 141.86, 139.85 (q, *J* = 2.7 Hz), 134.00, 129.22, 128.48, 127.55 (q, *J* = 311.0 Hz), 91.58.

**<sup>19</sup>F NMR** (376 MHz, Chloroform-*d*): δ -40.46.

**Physical State:** yellowish oil.

**HRMS (APPI/LTQ-Orbitrap)** *m/z*: [M + H]<sup>+</sup> Calcd for C<sub>8</sub>H<sub>5</sub>F<sub>3</sub>IOS<sup>+</sup> 332.9052; Found 332.9059.

### **S-(trifluoromethyl) 4-(trifluoromethyl)benzothioate (3n)**

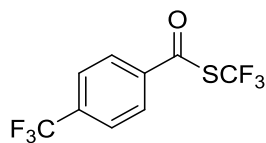

Following the General Procedure with the corresponding carboxylic acid (0.3 mmol). The crude product purified by flash column chromatography, using hexanes/EA = 30/1 (v/v) as an eluent, to yield the title compound **3n** (53 mg) in 65%.

**<sup>1</sup>H NMR** (400 MHz, Chloroform-*d*): δ 8.12 – 7.92 (m, 2H), 7.92 – 7.73 (m, 2H).

**<sup>13</sup>C NMR** (101 MHz, Chloroform-*d*): δ 182.77, 137.95, 136.42 (q, *J* = 33.2 Hz), 128.16, 127.79 (q, *J* = 310.2 Hz), 126.50 (q, *J* = 3.7 Hz), 123.29 (q, *J* = 273.1 Hz).

**<sup>19</sup>F NMR** (376 MHz, Chloroform-*d*): δ -39.60, -63.42.

**Physical State:** white solid.

**HRMS (EI)** *m/z*: [M - F]<sup>+</sup> Calcd for 254.9903; Found: 254.9904.

The spectra were consistent with the spectrum reported in the literature.<sup>3</sup>

#### 4-((trifluoromethylthio)carbonyl)benzoate (**3o**)

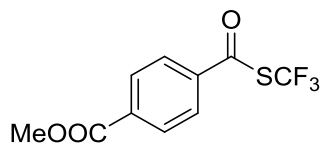

Following the General Procedure with the corresponding carboxylic acid (0.3 mmol). The crude product purified by flash column chromatography, using hexanes/EA = 20/1 (v/v) as an eluent, to yield the title compound **3o** (54 mg) in 68%.

**<sup>1</sup>H NMR** (400 MHz, Chloroform-d):  $\delta$  8.23 – 8.07 (m, 2H), 7.99 – 7.84 (m, 2H), 3.96 (s, 3H).

**<sup>13</sup>C NMR** (101 MHz, Chloroform-d):  $\delta$  183.06, 165.69, 138.32 (q,  $J = 2.7$  Hz), 135.83, 130.47, 127.89 (d,  $J = 310.1$  Hz), 127.70, 52.85.

**<sup>19</sup>F NMR** (376 MHz, Chloroform-d):  $\delta$  -39.65.

**Physical State:** off-white solid.

**HRMS (APPI/LTQ-Orbitrap)** m/z:  $[M + H]^+$  Calcd for  $C_{10}H_8F_3O_3S^+$  265.0141; Found 265.0140.

The spectra were consistent with the spectrum reported in the literature.<sup>2</sup>

#### S-(trifluoromethyl) 4-((tert-butoxycarbonyl)amino)benzothioate (**3p**)

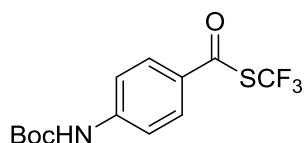

Following the General Procedure with the corresponding carboxylic acid (0.3 mmol). The crude product purified by flash column chromatography, using hexanes/EA = 30/1 (v/v) as an eluent, to yield the title compound **3p** (60 mg) in 62%.

**<sup>1</sup>H NMR** (400 MHz, Chloroform-d):  $\delta$  7.86 – 7.76 (m, 2H), 7.58 – 7.49 (m, 2H), 6.88 (s, 1H), 1.55 (s, 9H).

**<sup>13</sup>C NMR** (101 MHz, Chloroform-d):  $\delta$  151.88, 144.83, 129.31, 128.16 (q,  $J = 309.3$  Hz), 117.71, 81.82, 28.21.

**<sup>19</sup>F NMR** (376 MHz, Chloroform-d):  $\delta$  -39.43.

**Physical State:** pale grey solid.

**HRMS (APPI/LTQ-Orbitrap)** m/z:  $[M + H]^+$  Calcd for  $C_{13}H_{15}F_3NO_3S^+$  322.0719; Found 322.0710.

**S-(trifluoromethyl) 4-(methylthio)benzothioate (3q)**

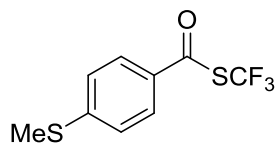

Following the General Procedure with the corresponding carboxylic acid (0.3 mmol). The crude product purified by flash column chromatography, using hexanes/EA = 30/1 (v/v) as an eluent, to yield the title compound **3q** (54 mg) in 72%.

**<sup>1</sup>H NMR** (400 MHz, Chloroform-d):  $\delta$  7.88 – 7.69 (m, 2H), 7.40 – 7.24 (m, 2H), 2.55 (s, 3H).

**<sup>13</sup>C NMR** (101 MHz, Chloroform-d):  $\delta$  182.14, 149.30, 131.17 (q,  $J$  = 2.9 Hz), 128.24 (q,  $J$  = 309.5 Hz), 128.05, 125.25, 14.73.

**<sup>19</sup>F NMR** (376 MHz, Chloroform-d):  $\delta$  -39.43.

**Physical State:** white solid.

**HRMS (APPI/LTQ-Orbitrap)** m/z: [M + H]<sup>+</sup> Calcd for C<sub>9</sub>H<sub>8</sub>F<sub>3</sub>OS<sub>2</sub><sup>+</sup> 252.9963; Found 252.9958.

**S-(trifluoromethyl) 4-(4,4,5,5-tetramethyl-1,3,2-dioxaborolan-2-yl)benzothioate (3r)**

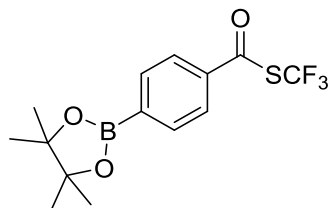

Following the General Procedure with the corresponding carboxylic acid (0.2 mmol). The crude product purified by flash column chromatography, using *n*-pentane/diethyl ether = 30/1 (v/v) as an eluent, to yield the title compound **3r** (40 mg) in 60%.

**<sup>1</sup>H NMR** (400 MHz, Chloroform-d):  $\delta$  8.04 – 7.90 (m, 2H), 7.90 – 7.79 (m, 2H), 1.38 (s, 12H).

**<sup>13</sup>C NMR** (101 MHz, Chloroform-d):  $\delta$  183.69, 137.06 (q,  $J$  = 2.6 Hz), 135.52, 128.16 (q,  $J$  = 309.6 Hz), 126.69, 84.65, 25.03.

**<sup>19</sup>F NMR** (376 MHz, Chloroform-d):  $\delta$  -39.68.

**Physical State:** yellow oil.

**HRMS (APPI/LTQ-Orbitrap)** m/z: [M + H]<sup>+</sup> Calcd for C<sub>14</sub>H<sub>17</sub>BF<sub>3</sub>O<sub>3</sub>S<sup>+</sup> 333.0938; Found 333.0939.

### **S-(trifluoromethyl) 4-(allyloxy)benzothioate (3s)**

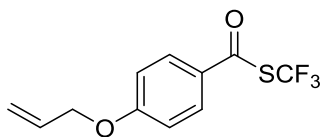

Following the General Procedure with the corresponding carboxylic acid (0.3 mmol). The crude product purified by flash column chromatography, using hexanes/EA = 30/1 (v/v) as an eluent, to yield the title compound **3s** (59 mg) in 75%.

**<sup>1</sup>H NMR** (400 MHz, Chloroform-d):  $\delta$  7.91 – 7.71 (m, 2H), 7.04 – 6.91 (m, 2H), 6.14 – 5.92 (m, 1H), 5.47 – 5.27 (m, 2H), 4.62 (dt,  $J$  = 5.3, 1.6 Hz, 2H).

**<sup>13</sup>C NMR** (101 MHz, Chloroform-d):  $\delta$  181.57, 164.20, 132.12, 130.19, 128.34 (q,  $J$  = 309.2 Hz), 128.01 (q,  $J$  = 2.9 Hz), 118.69, 115.23, 69.27.

**<sup>19</sup>F NMR** (376 MHz, Chloroform-d):  $\delta$  -39.43.

**Physical State:** white solid.

**HRMS (APPI/LTQ-Orbitrap)**  $m/z$ :  $[M + H]^+$  Calcd for  $C_{11}H_{10}F_3O_2S^+$  263.0348; Found 263.0347.

### **S-(trifluoromethyl) 4-(prop-1-yn-1-yloxy)benzothioate (3t)**

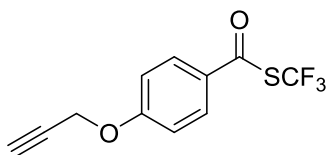

Following the General Procedure with the corresponding carboxylic acid (0.3 mmol). The crude product purified by flash column chromatography, using hexanes/EA = 30/1 (v/v) as an eluent, to yield the title compound **3t** (53 mg) in 68%.

**<sup>1</sup>H NMR** (400 MHz, Chloroform-d):  $\delta$  7.89 – 7.80 (m, 2H), 7.10 – 7.01 (m, 2H), 4.78 (d,  $J$  = 2.4 Hz, 2H), 2.57 (t,  $J$  = 2.4 Hz, 1H).

**<sup>13</sup>C NMR** (101 MHz, Chloroform-d):  $\delta$  181.69, 162.94, 130.66, 130.13, 128.71 (q,  $J$  = 2.8 Hz), 128.27 (q,  $J$  = 309.3 Hz), 115.44, 56.20.

**<sup>19</sup>F NMR** (376 MHz, Chloroform-d):  $\delta$  -39.44.

**Physical State:** white solid.

**HRMS (APPI/LTQ-Orbitrap)**  $m/z$ :  $[M + H]^+$  Calcd for  $C_{11}H_8F_3O_2S^+$  261.0192; Found 261.0190.

### **S-(trifluoromethyl) benzo[1,3]dioxole-5-carbothioate (3u)**

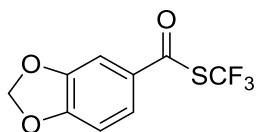

Following the General Procedure with the corresponding carboxylic acid (0.3 mmol). The crude product purified by flash column chromatography, using *n*-pentane/diethyl ether = 20/1 (v/v) as an eluent, to yield the title compound **3u** (61 mg) in 81%.

**<sup>1</sup>H NMR** (400 MHz, Chloroform-*d*): δ 7.46 (ddd, *J* = 8.2, 1.9, 0.7 Hz, 1H), 7.28 (dd, *J* = 12.7, 1.2 Hz, 1H), 6.88 (d, *J* = 8.2 Hz, 1H), 6.09 (s, 2H).

**<sup>13</sup>C NMR** (101 MHz, Chloroform-*d*): δ 181.40, 153.66, 148.81, 129.64 (q, *J* = 2.8 Hz), 128.20 (q, *J* = 309.3 Hz), 124.60, 108.58, 107.39, 102.61.

**<sup>19</sup>F NMR** (376 MHz, Chloroform-*d*): δ -39.58.

**Physical State:** off-white solid.

**HRMS (APPI/LTQ-Orbitrap)** *m/z*: [M + H]<sup>+</sup> Calcd for C<sub>9</sub>H<sub>6</sub>F<sub>3</sub>O<sub>3</sub>S<sup>+</sup> 250.9984; Found 250.9983.

### **S-(trifluoromethyl) naphthalene-2-carbothioate (3v)**

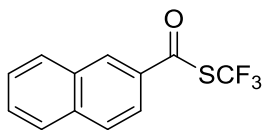

Following the General Procedure with the corresponding carboxylic acid (0.3 mmol). The crude product purified by flash column chromatography, using *n*-pentane/diethyl ether = 20/1 (v/v) as an eluent, to yield the title compound **3v** (68 mg) in 89%.

**<sup>1</sup>H NMR** (400 MHz, Chloroform-*d*): δ 8.39 (s, 1H), 8.05 – 7.76 (m, 4H), 7.64 (m, 2H).

**<sup>13</sup>C NMR** (101 MHz, Chloroform-*d*): δ 183.14, 136.37, 132.40 (q, *J* = 2.8 Hz), 132.25, 129.86, 129.72, 129.59, 129.28, 128.13 (q, *J* = 309.6 Hz), 127.97, 127.56, 122.57.

**<sup>19</sup>F NMR** (376 MHz, Chloroform-*d*): δ -39.50.

**Physical State:** white solid.

**HRMS (APPI/LTQ-Orbitrap)** *m/z*: [M + H]<sup>+</sup> Calcd for C<sub>12</sub>H<sub>8</sub>F<sub>3</sub>OS<sup>+</sup> 257.0243; Found 257.0244.

The spectra were consistent with the spectrum reported in the literature.<sup>2</sup>

### ***S*-(trifluoromethyl) quinoline-8-carbothioate (3w)**

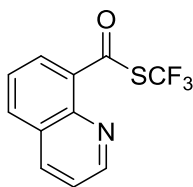

Following the General Procedure with the corresponding carboxylic acid (0.3 mmol). The crude product purified by flash column chromatography, using hexanes/EA = 20/1 (v/v) as an eluent, to yield the title compound **3w** (51 mg) in 66%.

**<sup>1</sup>H NMR** (400 MHz, Chloroform-*d*): δ 9.01 (dd, *J* = 4.2, 1.8 Hz, 1H), 8.44 (dd, *J* = 7.4, 1.5 Hz, 1H), 8.28 (dd, *J* = 8.3, 1.8 Hz, 1H), 8.10 (dd, *J* = 8.2, 1.5 Hz, 1H), 7.68 (t, *J* = 7.7 Hz, 1H), 7.56 (dd, *J* = 8.4, 4.2 Hz, 1H).

**<sup>13</sup>C NMR** (101 MHz, Chloroform-*d*): δ 149.95, 145.01, 136.90, 134.32, 132.10 (q, *J* = 9.9 Hz), 131.92, 128.52 (q, *J* = 12.3 Hz), 128.29 (q, *J* = 313.1 Hz), 128.06, 126.34, 122.14.

**<sup>19</sup>F NMR** (376 MHz, Chloroform-*d*): δ -43.85.

**Physical State:** off-white solid.

**HRMS (APPI/LTQ-Orbitrap)** *m/z*: [M + H]<sup>+</sup> Calcd for C<sub>11</sub>H<sub>7</sub>F<sub>3</sub>NOS<sup>+</sup> 258.0195; Found 258.019.

### ***S*-(trifluoromethyl) benzothiophene-5-carbothioate (3x)**

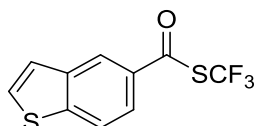

Following the General Procedure with the corresponding carboxylic acid (0.3 mmol). The crude product purified by flash column chromatography, using hexanes/EA = 20/1 (v/v) as an eluent, to yield the title compound **3x** (56 mg) in 71%.

**<sup>1</sup>H NMR** (400 MHz, Chloroform-*d*): δ 8.33 (d, *J* = 1.8 Hz, 1H), 7.97 (dd, *J* = 8.4, 0.9 Hz, 1H), 7.79 (dd, *J* = 8.5, 1.8 Hz, 1H), 7.60 (d, *J* = 5.5 Hz, 1H), 7.46 (dd, *J* = 5.5, 0.8 Hz, 1H).

**<sup>13</sup>C NMR** (101 MHz, Chloroform-*d*): δ 183.07, 146.08, 139.44, 131.61 (q, *J* = 2.8 Hz), 129.03, 128.11 (q, *J* = 309.5 Hz), 124.52, 123.71, 123.28, 122.25.

**<sup>19</sup>F NMR** (376 MHz, Chloroform-*d*): δ -39.51.

**Physical State:** yellowish solid.

**HRMS (APPI/LTQ-Orbitrap)** *m/z*: [M + H]<sup>+</sup> Calcd for C<sub>10</sub>H<sub>6</sub>F<sub>3</sub>OS<sub>2</sub><sup>+</sup> 262.9807; Found 262.9806.

**S-(trifluoromethyl) 2-(4-methoxyphenyl)ethanethioate (4a)**

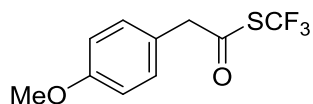

Following the General Procedure with the corresponding carboxylic acid (0.3 mmol). The crude product purified by flash column chromatography, using hexanes/EA = 30/1 (v/v) as an eluent, to yield the title compound **4a** (51 mg) in 68%.

**<sup>1</sup>H NMR** (400 MHz, Chloroform-*d*):  $\delta$  7.23 – 7.16 (m, 2H), 6.97 – 6.85 (m, 2H), 3.82 (s, 3H), 3.81 (s, 2H).

**<sup>13</sup>C NMR** (101 MHz, Chloroform-*d*):  $\delta$  190.03, 159.99, 131.52, 127.93 (q,  $J = 310.2$  Hz), 122.62, 114.68, 55.43, 50.12 (q,  $J = 2.8$  Hz).

**<sup>19</sup>F NMR** (376 MHz, Chloroform-*d*):  $\delta$  -40.69.

**Physical State:** colorless oil.

**HRMS (nanochip-ESI/LTQ-Orbitrap)**  $m/z$ :  $[M]^+$  Calcd for C<sub>10</sub>H<sub>9</sub>F<sub>3</sub>O<sub>2</sub>S<sup>+</sup> 250.0270; Found 250.0267.

**S-(trifluoromethyl) (1*R*,2*R*)-2-phenylcyclopropane-1-carbothioate (4b)**

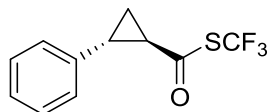

Following the General Procedure with the corresponding carboxylic acid (0.3 mmol). The crude product purified by flash column chromatography, using *n*-pentane/diethyl ether = 30/1 (v/v) as an eluent, to yield the title compound **4b** (48 mg) in 65%.

**<sup>1</sup>H NMR** (400 MHz, Chloroform-*d*):  $\delta$  7.41 – 7.23 (m, 3H), 7.21 – 7.09 (m, 2H), 2.86 (ddd,  $J = 9.5, 7.1, 4.0$  Hz, 1H), 2.17 (dt,  $J = 8.6, 4.6$  Hz, 1H), 1.94 (dt,  $J = 9.6, 5.0$  Hz, 1H), 1.65 (td,  $J = 7.6, 4.8$  Hz, 1H).

**<sup>13</sup>C NMR** (101 MHz, Chloroform-*d*):  $\delta$  188.73, 138.41, 128.86, 127.72 (q,  $J = 310.0$  Hz), 127.41, 126.42, 33.92 (q,  $J = 3.7$  Hz), 30.30, 19.79.

**<sup>19</sup>F NMR** (376 MHz, Chloroform-*d*):  $\delta$  -40.02.

**Physical State:** pale yellow oil.

**HRMS (APPI/LTQ-Orbitrap)**  $m/z$ :  $[M]^+$  Calcd for C<sub>11</sub>H<sub>9</sub>F<sub>3</sub>OS<sup>+</sup> 246.0321; Found 246.0317.



### ***S*-(trifluoromethyl) 1-(4-methylphenyl)cyclopropane-1-carbothioate (4c)**

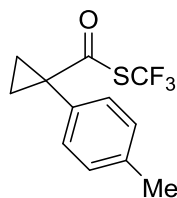

Following the General Procedure with the corresponding carboxylic acid (0.3 mmol). The crude product purified by flash column chromatography, using *n*-pentane/diethyl ether =30/1 (v/v) as an eluent, to yield the title compound **4c** (53 mg) in 68%.

**<sup>1</sup>H NMR** (400 MHz, Chloroform-*d*): δ 7.34 (d, *J* = 7.7 Hz, 2H), 7.21 (d, *J* = 7.7 Hz, 2H), 2.40 (s, 3H), 1.83 (q, *J* = 3.6 Hz, 2H), 1.37 (q, *J* = 4.1 Hz, 2H).

**<sup>13</sup>C NMR** (101 MHz, Chloroform-*d*): δ 193.73, 139.75, 132.97, 132.42, 129.68, 128.07 (q, *J* = 310.1 Hz), 38.23 (q, *J* = 3.2 Hz), 21.45, 20.48.

**<sup>19</sup>F NMR** (376 MHz, Chloroform-*d*): δ -41.84.

**Physical State:** yellowish oil.

**HRMS (APPI/LTQ-Orbitrap)** *m/z*: [M]<sup>+</sup> Calcd for C<sub>12</sub>H<sub>11</sub>F<sub>3</sub>OS<sup>+</sup> 260.0477; Found 260.0478.

### ***S*-(trifluoromethyl) 1-(4-chlorophenyl)cyclopropane-1-carbothioate (4d)**

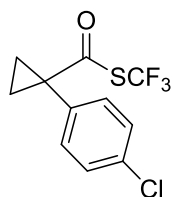

Following the General Procedure with the corresponding carboxylic acid (0.3 mmol). The crude product purified by flash column chromatography, using *n*-pentane/diethyl ether =30/1 (v/v) as an eluent, to yield the title compound **4d** (58 mg) in 69%.

**<sup>1</sup>H NMR** (400 MHz, Chloroform-*d*): δ 7.38 (d, *J* = 2.4 Hz, 4H), 1.85 (q, *J* = 4.1 Hz, 2H), 1.36 (q, *J* = 4.1 Hz, 2H).

**<sup>13</sup>C NMR** (101 MHz, Chloroform-*d*): δ 192.73, 135.79, 134.53, 133.80, 129.27, 127.86 (q, *J* = 310.2 Hz), 38.02 (q, *J* = 3.3 Hz), 20.48.

**<sup>19</sup>F NMR** (376 MHz, Chloroform-*d*): δ -41.61.

**Physical State:** yellowish oil.

**HRMS (APPI/LTQ-Orbitrap)** *m/z*: [M]<sup>+</sup> Calcd for C<sub>11</sub>H<sub>8</sub>ClF<sub>3</sub>OS<sup>+</sup> 279.9931; Found 279.9932.

***S*-(trifluoromethyl) 1-(4-methoxyphenyl)cyclopropane-1-carbothioate (4e)**

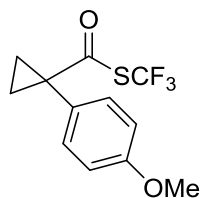

Following the General Procedure with the corresponding carboxylic acid (0.3 mmol). The crude product purified by flash column chromatography, using *n*-pentane/diethyl ether =30/1 (v/v) as an eluent, to yield the title compound **4e** (62 mg) in 75%.

**<sup>1</sup>H NMR** (400 MHz, Chloroform-*d*): δ 7.36 (d, *J* = 8.4 Hz, 2H), 6.91 (d, *J* = 8.4 Hz, 2H), 3.84 (s, 3H), 1.81 (q, *J* = 3.9 Hz, 2H), 1.35 (q, *J* = 4.0 Hz, 2H).

**<sup>13</sup>C NMR** (101 MHz, Chloroform-*d*): δ 194.05, 160.60, 133.82, 128.10 (q, *J* = 310.1 Hz), 127.80, 114.30, 55.46, 37.80 (q, *J* = 3.3 Hz), 20.64.

**<sup>19</sup>F NMR** (376 MHz, Chloroform-*d*): δ -41.95.

**Physical State:** reddish oil.

**HRMS (APPI/LTQ-Orbitrap)** *m/z*: [M]<sup>+</sup> Calcd for C<sub>12</sub>H<sub>11</sub>F<sub>3</sub>O<sub>2</sub>S<sup>+</sup> 276.0426; Found 276.0429.

***S*-(trifluoromethyl) (*E*)-3-phenylprop-2-enethioate (5a)**

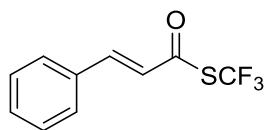

Following the General Procedure with the corresponding carboxylic acid (0.3 mmol). The crude product purified by flash column chromatography, using *n*-pentane/diethyl ether =30/1 (v/v) as an eluent, to yield the title compound **5a** (57 mg) in 82%.

**<sup>1</sup>H NMR** (400 MHz, Chloroform-*d*): δ 7.65 (d, *J* = 15.8 Hz, 1H), 7.60 – 7.53 (m, 2H), 7.51 – 7.38 (m, 3H), 6.61 (d, *J* = 15.8 Hz, 1H).

**<sup>13</sup>C NMR** (101 MHz, Chloroform-*d*): δ 180.95, 145.18, 133.14, 131.95, 129.36, 129.01, 128.07 (q, *J* = 309.5 Hz), 122.86 (q, *J* = 3.1 Hz).

**<sup>19</sup>F NMR** (376 MHz, Chloroform-*d*): δ -39.52.

**Physical State:** colorless oil.

**HRMS (APPI/LTQ-Orbitrap)** *m/z*: [M + H]<sup>+</sup> Calcd for C<sub>10</sub>H<sub>8</sub>F<sub>3</sub>OS<sup>+</sup> 233.0242; Found 233.0241.

***S*-(trifluoromethyl) (*E*)-3-(4-fluorophenyl)prop-2-enethioate (**5b**)**

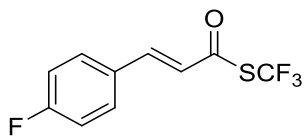

Following the General Procedure with the corresponding carboxylic acid (0.3 mmol). The crude product purified by flash column chromatography, using *n*-pentane/diethyl ether =30/1 (v/v) as an eluent, to yield the title compound **5b** (53 mg) in 70%.

**<sup>1</sup>H NMR** (400 MHz, Chloroform-*d*): δ 7.71 – 7.44 (m, 3H), 7.12 (t, *J* = 8.4 Hz, 2H), 6.53 (d, *J* = 15.8 Hz, 1H).

**<sup>13</sup>C NMR** (101 MHz, Chloroform-*d*): δ 180.77, 164.90 (d, *J* = 254.3 Hz), 143.75, 131.08 (d, *J* = 8.8 Hz), 129.42 (d, *J* = 3.4 Hz), 128.02 (q, *J* = 309.5 Hz), 122.86 – 122.11 (m), 116.64 (d, *J* = 22.2 Hz).

**<sup>19</sup>F NMR** (376 MHz, Chloroform-*d*): δ -39.53, -106.55.

**Physical State:** yellowish solid.

**HRMS (APPI/LTQ-Orbitrap)** *m/z*: [M + H]<sup>+</sup> Calcd for C<sub>10</sub>H<sub>7</sub>F<sub>4</sub>OS<sup>+</sup> 251.0148; Found 251.0149.

***S*-(trifluoromethyl) (*E*)-3-(4-chlorophenyl)prop-2-enethioate (**5c**)**

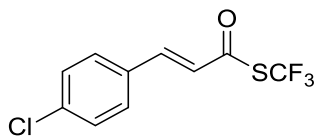

Following the General Procedure with the corresponding carboxylic acid (0.3 mmol). The crude product purified by flash column chromatography, using *n*-pentane/diethyl ether =30/1 (v/v) as an eluent, to yield the title compound **5c** (57 mg) in 71%.

**<sup>1</sup>H NMR** (400 MHz, Chloroform-*d*): δ 7.59 (d, *J* = 15.8 Hz, 1H), 7.52 – 7.46 (m, 2H), 7.44 – 7.37 (m, 2H), 6.57 (d, *J* = 15.8 Hz, 1H).

**<sup>13</sup>C NMR** (101 MHz, Chloroform-*d*): δ 180.77 (q, *J* = 1.6 Hz), 143.55, 138.04, 131.60, 130.11, 129.68, 127.97 (q, *J* = 309.6 Hz), 123.19 (q, *J* = 3.1 Hz).

**<sup>19</sup>F NMR** (376 MHz, Chloroform-*d*): δ -39.52.

**Physical State:** white solid.

**HRMS (APPI/LTQ-Orbitrap)** *m/z*: [M + H]<sup>+</sup> Calcd for C<sub>10</sub>H<sub>7</sub>ClF<sub>3</sub>OS<sup>+</sup> 266.9853; Found 266.9853.

***S*-(trifluoromethyl) (*E*)-3-(4-bromophenyl)prop-2-enethioate (**5d**)**

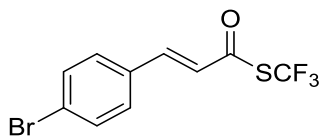

Following the General Procedure with the corresponding carboxylic acid (0.2 mmol). The crude product purified by flash column chromatography, using hexanes/EA = 30/1 (v/v) as an eluent, to yield the title compound **5d** (51 mg) in 82%.

**<sup>1</sup>H NMR** (400 MHz, Chloroform-*d*): δ 7.64 – 7.53 (m, 3H), 7.42 (d, *J* = 8.5 Hz, 2H), 6.59 (d, *J* = 15.8 Hz, 1H).

**<sup>13</sup>C NMR** (101 MHz, Chloroform-*d*): δ 180.80, 143.64, 132.68, 132.04, 130.26, 127.95 (q, *J* = 309.7 Hz), 126.51, 123.30 (q, *J* = 3.2 Hz).

**<sup>19</sup>F NMR** (376 MHz, Chloroform-*d*): δ -39.52.

**Physical State:** white solid.

**HRMS (APPI/LTQ-Orbitrap)** *m/z*: [M + H]<sup>+</sup> Calcd for C<sub>10</sub>H<sub>7</sub>BrF<sub>3</sub>OS<sup>+</sup> 310.9348; Found 310.9350.

***S*-(trifluoromethyl) (*E*)-3-(2-(trifluoromethyl)phenyl)prop-2-enethioate (**5e**)**

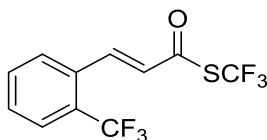

Following the General Procedure with the corresponding carboxylic acid (0.3 mmol). The crude product purified by flash column chromatography, using *n*-pentane/diethyl ether = 30/1 (v/v) as an eluent, to yield the title compound **5e** (63 mg) in 70%.

**<sup>1</sup>H NMR** (400 MHz, Chloroform-*d*): δ 8.03 (dd, *J* = 15.7, 2.1 Hz, 1H), 7.73 (dd, *J* = 14.3, 7.7 Hz, 2H), 7.59 (dt, *J* = 22.1, 7.5 Hz, 2H), 6.58 (d, *J* = 15.6 Hz, 1H).

**<sup>13</sup>C NMR** (101 MHz, Chloroform-*d*): δ 180.67, 140.32 (q, *J* = 2.2 Hz), 132.33 (q, *J* = 1.1 Hz), 131.78 (q, *J* = 1.6 Hz), 130.91, 129.64 (q, *J* = 30.6 Hz), 128.00, 127.73 (q, *J* = 309.8 Hz), 126.82 – 126.32 (m), 123.70 (q, *J* = 274.1 Hz).

**<sup>19</sup>F NMR** (376 MHz, Chloroform-*d*): δ -39.62, -58.73.

**Physical State:** yellowish oil.

**HRMS (APPI/LTQ-Orbitrap)** *m/z*: [M + H]<sup>+</sup> Calcd for C<sub>11</sub>H<sub>7</sub>F<sub>6</sub>OS<sup>+</sup> 301.0116; Found 301.0116.

***S*-(trifluoromethyl) (*E*)-3-(4-methoxyphenyl)prop-2-enethioate (**5f**)**

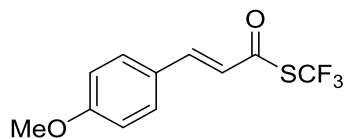

Following the General Procedure with the corresponding carboxylic acid (0.3 mmol). The crude product purified by flash column chromatography, using *n*-pentane/diethyl ether =20/1 (v/v) as an eluent, to yield the title compound **5f** (72 mg) in 91%.

**<sup>1</sup>H NMR** (400 MHz, Chloroform-*d*): δ 7.60 (d, *J* = 15.7 Hz, 1H), 7.55 – 7.48 (m, 2H), 6.96 – 6.88 (m, 2H), 6.46 (d, *J* = 15.7 Hz, 1H), 3.86 (s, 3H).

**<sup>13</sup>C NMR** (101 MHz, Chloroform-*d*): δ 180.68, 162.84, 145.00, 130.99, 128.22 (q, *J* = 309.2 Hz), 125.81, 120.31 (q, *J* = 3.1 Hz), 114.84, 55.62.

**<sup>19</sup>F NMR** (376 MHz, Chloroform-*d*): δ -39.45.

**Physical State:** off-white solid.

**HRMS (APPI/LTQ-Orbitrap)** *m/z*: [M + H]<sup>+</sup> Calcd for C<sub>11</sub>H<sub>10</sub>F<sub>3</sub>O<sub>2</sub>S<sup>+</sup> 263.0348; Found 263.0352.

***S*-(trifluoromethyl) (*E*)-3-(4-(dimethylamino)phenyl)prop-2-enethioate (**5g**)**

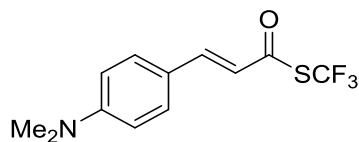

Following the General Procedure with the corresponding carboxylic acid (0.3 mmol). The crude product purified by flash column chromatography, using *n*-pentane/diethyl ether =20/1 (v/v) as an eluent, to yield the title compound **5g** (49 mg) in 59%.

**<sup>1</sup>H NMR** (400 MHz, Chloroform-*d*): δ 7.58 (d, *J* = 15.4 Hz, 1H), 7.51 – 7.39 (m, 2H), 6.73 – 6.62 (m, 2H), 6.36 (d, *J* = 15.4 Hz, 1H), 3.06 (s, 6H).

**<sup>13</sup>C NMR** (101 MHz, Chloroform-*d*): δ 180.20, 152.91, 146.10, 131.27, 128.52 (q, *J* = 308.8 Hz), 120.69, 116.90 (q, *J* = 3.3 Hz), 111.92, 40.21.

**<sup>19</sup>F NMR** (376 MHz, Chloroform-*d*): δ -39.29.

**Physical State:** yellowish solid.

**HRMS (APPI/LTQ-Orbitrap)** *m/z*: [M + H]<sup>+</sup> Calcd for C<sub>12</sub>H<sub>13</sub>F<sub>3</sub>NOS<sup>+</sup> 276.0664; Found 276.0665.

***S*-(trifluoromethyl) (E)-3-(4-(trifluoromethoxy)phenyl)prop-2-enethioate (5h)**

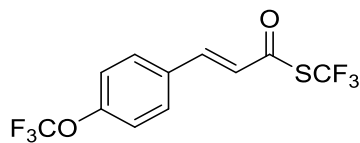

Following the General Procedure with the corresponding carboxylic acid (0.3 mmol). The crude product purified by flash column chromatography, using *n*-pentane/diethyl ether =20/1 (v/v) as an eluent, to yield the title compound **5h** (71 mg) in 75%.

**<sup>1</sup>H NMR** (400 MHz, Chloroform-*d*): δ 7.64 (d, *J* = 15.8 Hz, 1H), 7.55 – 7.45 (m, 2H), 7.42 (s, 1H), 7.38 – 7.30 (m, 1H), 6.64 (d, *J* = 15.8 Hz, 1H).

**<sup>13</sup>C NMR** (101 MHz, Chloroform-*d*): δ 180.61, 149.80 (d, *J* = 2.1 Hz), 142.94, 135.05, 130.69, 127.75 (q, *J* = 309.8 Hz), 127.16, 124.20 (q, *J* = 3.1 Hz), 123.82, 120.71, 120.37 (q, *J* = 258.2 Hz).

**<sup>19</sup>F NMR** (376 MHz, Chloroform-*d*): δ -39.60, -57.89.

**Physical State:** colorless oil.

**HRMS (APPI/LTQ-Orbitrap)** *m/z*: [M + H]<sup>+</sup> Calcd for C<sub>11</sub>H<sub>7</sub>F<sub>6</sub>O<sub>2</sub>S<sup>+</sup> 317.0066; Found 317.0069.

***S*-(trifluoromethyl) 6-(3-(adamantan-1-yl)-4-methoxyphenyl)naphthalene-2-carbothioate (6a)**

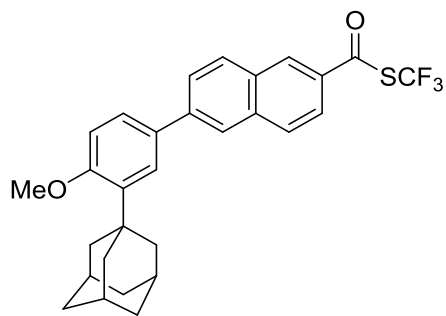

Following the General Procedure with the corresponding carboxylic acid (0.2 mmol). The crude product purified by flash column chromatography, using hexanes/EA = 30/1 (v/v) as an eluent, to yield the title compound **6a** (90 mg) in 91%.

**<sup>1</sup>H NMR** (400 MHz, Chloroform-*d*): δ 8.41 (s, 1H), 8.07 – 7.99 (m, 2H), 7.97 (d, *J* = 8.7 Hz, 1H), 7.87 (ddd, *J* = 8.6, 4.5, 1.8 Hz, 2H), 7.61 (d, *J* = 2.4 Hz, 1H), 7.56 (dd, *J* = 8.4, 2.3 Hz, 1H), 7.01 (d, *J* = 8.5 Hz, 1H), 2.23 – 2.07 (m, 9H), 1.81 (d, *J* = 3.0 Hz, 6H).

<sup>13</sup>C NMR (101 MHz, Chloroform-*d*): 182.97, 159.23, 142.80, 139.17, 136.89, 132.00, 131.90 (q, *J* = 2.6 Hz), 130.96, 130.10, 129.72, 129.28, 128.18 (q, *J* = 310.6 Hz), 127.34, 126.01, 125.83, 124.77, 122.97, 112.16, 55.19, 40.61, 37.25, 37.12, 29.11.

<sup>19</sup>F NMR (376 MHz, Chloroform-*d*): δ -39.46.

**Physical State:** white solid.

**HRMS (APPI/LTQ-Orbitrap)** [M]<sup>+</sup> Calcd for C<sub>29</sub>H<sub>27</sub>F<sub>3</sub>O<sub>2</sub>S<sup>+</sup> 496.1678; Found 496.1672.

### **S-(trifluoromethyl) 4-(*N,N*-dipropylsulfamoyl)benzothioate (6b)**

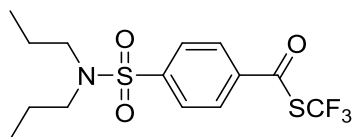

Following the General Procedure with the corresponding carboxylic acid (0.3 mmol). The crude product purified by flash column chromatography, using hexanes/EA = 20/1 (v/v) as an eluent, to yield the title compound **6b** (51 mg) in 46%.

<sup>1</sup>H NMR (400 MHz, Methylene Chloride-*d*<sub>2</sub>): δ 8.12 – 7.91 (m, 4H), 3.19 – 3.05 (t, *J* = 7.4 Hz, 4H), 1.57 (h, *J* = 7.4 Hz, 4H), 0.90 (t, *J* = 7.4 Hz, 6H).

<sup>13</sup>C NMR (101 MHz, Methylene Chloride-*d*<sub>2</sub>): δ 146.29, 137.51 (q, *J* = 2.7 Hz), 132.15 (q, *J* = 10.8 Hz), 128.48 (q, *J* = 12.5 Hz), 128.28, 127.83 (q, *J* = 309.9 Hz), 127.73, 49.90, 21.88, 10.86.

<sup>19</sup>F NMR (376 MHz, Methylene Chloride-*d*<sub>2</sub>): δ -40.18.

**Physical State:** white solid.

**HRMS (APPI/LTQ-Orbitrap)** m/z: [M + H]<sup>+</sup> Calcd for C<sub>14</sub>H<sub>19</sub>F<sub>3</sub>NO<sub>3</sub>S<sub>2</sub><sup>+</sup> 370.0753; Found 370.0752.

### **(10*S*,13*R*,14*R*,17*R*)-4,4,10,13,14-pentamethyl-17-((*R*)-6-methylhept-5-en-2-yl)-2,3,4,5,6,7,10,11,12,13,14,15,16,17-tetradecahydro-1*H*-cyclopenta[*a*]phenanthren-3-yl (((trifluoromethyl)thio)carbonyl)benzoate (6c)**

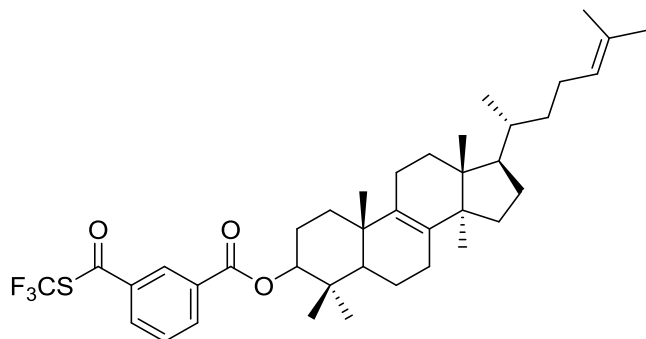

Following the General Procedure with the corresponding carboxylic acid (0.2 mmol). The crude product purified by flash column chromatography, using hexanes/EA = 20/1 (v/v) as an eluent, to yield the title compound **6c** (116 mg) in 88% (mixture of 2 diastereoisomers).

**<sup>1</sup>H NMR** (400 MHz, Chloroform-*d*): δ 146.29, 137.51 (q, *J* = 2.7 Hz), 132.15 (q, *J* = 10.8 Hz), 128.48 (q, *J* = 12.5 Hz), 128.28, 127.83 (q, *J* = 309.9 Hz), 127.73, 49.90, 21.88, 10.86.

**<sup>13</sup>C NMR** (101 MHz, Chloroform-*d*): δ 182.74, 164.57, 135.62, 134.68, 134.66, 134.13, 132.31, 131.25, 130.90, 129.47, 128.67, 125.25, 82.66, 50.59, 50.52, 50.41, 49.84, 44.51, 44.49, 39.54, 38.24, 36.96, 36.50, 36.37, 36.28, 35.28, 30.99, 30.85, 29.72, 28.23, 28.22, 28.14, 28.02, 26.39, 25.74, 24.94, 24.31, 24.29, 24.25, 24.13, 22.85, 22.56, 21.07, 19.22, 18.74, 18.66, 18.17, 17.65, 16.86, 15.78.

**<sup>19</sup>F NMR** (376 MHz, Chloroform-*d*): δ -39.55.

**Physical State:** white solid.

**HRMS (APPI/LTQ-Orbitrap)** *m/z*: [M]<sup>+</sup> Calcd for C<sub>39</sub>H<sub>53</sub>F<sub>3</sub>O<sub>3</sub>S<sup>+</sup> 658.3662; Found 658.3661.

***S*-(trifluoromethyl) 4-(((1*R*,2*S*,5*R*)-2-isopropyl-5-methylcyclohexyl)oxy)benzothioate (**6d**)**

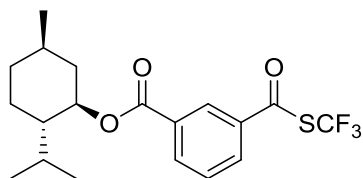

Following the General Procedure with the corresponding carboxylic acid (0.2 mmol). The crude product purified by flash column chromatography, using hexanes/EA = 30/1 (v/v) as an eluent, to yield the title compound **6d** (67 mg) in 86%.

**<sup>1</sup>H NMR** (400 MHz, Chloroform-*d*): δ 8.49 (t, *J* = 1.8 Hz, 1H), 8.33 (dt, *J* = 7.8, 1.4 Hz, 1H), 8.03 (ddd, *J* = 7.9, 2.0, 1.2 Hz, 1H), 7.61 (t, *J* = 7.8 Hz, 1H), 4.98 (td, *J* = 10.9, 4.4 Hz, 1H), 2.16 – 2.08 (m, 1H), 1.92 (pd, *J* = 7.0, 2.8 Hz, 1H), 1.78 – 1.71 (m, 2H), 1.62 – 1.55 (m, 2H), 1.18 – 1.09 (m, 2H), 0.93 (dd, *J* = 6.8, 5.3 Hz, 6H), 0.80 (d, *J* = 6.9 Hz, 3H).

**<sup>13</sup>C NMR** (101 MHz, Chloroform-*d*): δ 182.98, 164.59, 135.82, 135.52 (q, *J* = 2.8 Hz), 132.32, 131.41, 129.58, 128.80, 127.98 (q, *J* = 309.9 Hz), 76.03, 47.33, 41.03, 34.36, 31.62, 26.76, 23.80, 22.15, 20.87, 16.70.

**<sup>19</sup>F NMR** (376 MHz, Chloroform-*d*): δ -39.58.

**Physical State:** white solid.

**HRMS (APPI/LTQ-Orbitrap)** *m/z*: [M+H]<sup>+</sup> Calcd for C<sub>19</sub>H<sub>24</sub>F<sub>3</sub>O<sub>3</sub>S<sup>+</sup> 389.1393; Found 389.1394.



***S*-(trifluoromethyl) (2*E*,4*E*)-5-(benzo[1,3]dioxol-5-yl)penta-2,4-dienethioate (6e)**

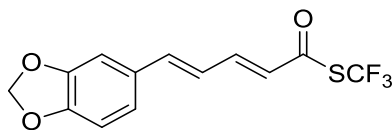

Following the General Procedure with the corresponding carboxylic acid (0.2 mmol). The crude product purified by flash column chromatography, using *n*-pentane/diethyl ether =20/1 (v/v) as an eluent, to yield the title compound **6e** (43 mg) in 71%.

**<sup>1</sup>H NMR** (400 MHz, Chloroform-*d*): δ 7.38 (dd, *J* = 15.0, 11.1 Hz, 1H), 7.02 – 6.94 (m, 3H), 6.81 (d, *J* = 8.0 Hz, 1H), 6.67 (dd, *J* = 15.4, 11.1 Hz, 1H), 6.10 (d, *J* = 15.0 Hz, 1H), 6.01 (s, 2H).

**<sup>13</sup>C NMR** (101 MHz, Chloroform-*d*): δ 180.46, 149.63, 148.62, 145.39, 144.81, 130.06, 128.21 (q, *J* = 309.2 Hz), 124.57 (q, *J* = 3.1 Hz), 124.19, 123.43, 108.83, 106.17, 101.76.

**<sup>19</sup>F NMR** (376 MHz, Chloroform-*d*): δ -39.42.

**Physical State:** yellowish solid.

**HRMS (APPI/LTQ-Orbitrap)** *m/z*: [M + H]<sup>+</sup> Calcd for C<sub>13</sub>H<sub>10</sub>F<sub>3</sub>O<sub>3</sub>S<sup>+</sup> 303.0297; Found 303.0296.

***S*-(trifluoromethyl) (*E*)-3-(2,3-dimethoxyphenyl)prop-2-enethioate (6f)**

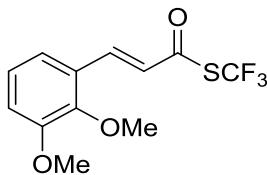

Following the General Procedure with the corresponding carboxylic acid (0.3 mmol). The crude product purified by flash column chromatography, using *n*-pentane/diethyl ether =20/1 (v/v) as an eluent, to yield the title compound **6f** (75 mg) in 86%.

**<sup>1</sup>H NMR** (400 MHz, Chloroform-*d*): δ 7.96 (d, *J* = 16.0 Hz, 1H), 7.14 – 6.98 (m, 3H), 6.67 (d, *J* = 16.0 Hz, 1H), 3.89 (s, 6H).

**<sup>13</sup>C NMR** (101 MHz, Chloroform-*d*): δ 181.31, 153.31, 149.48, 140.29, 128.16 (q, *J* = 309.4 Hz), 127.19, 124.49, 124.07 (q, *J* = 3.1 Hz), 119.78, 115.59, 61.56, 56.04.

**<sup>19</sup>F NMR** (376 MHz, Chloroform-*d*): δ -39.56.

**Physical State:** yellowish oil.

**HRMS (APPI/LTQ-Orbitrap)** *m/z*: [M + H]<sup>+</sup> Calcd for C<sub>12</sub>H<sub>12</sub>F<sub>3</sub>O<sub>3</sub>S<sup>+</sup> 293.0454; Found 293.0447.

**S-(trifluoromethyl) 2-(10-oxo-10,11-dihydrodibenzo[*b,f*]thiepin-2-yl)propanethioate (6g)**

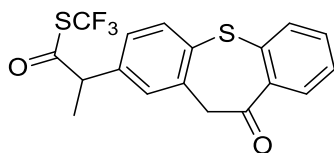

Following the General Procedure with the corresponding carboxylic acid (0.2 mmol). The crude product purified by flash column chromatography, using *n*-pentane/diethyl ether =20/1 (v/v) as an eluent, to yield the title compound **6g** (50 mg) in 66%.

**<sup>1</sup>H NMR** (400 MHz, Chloroform-*d*): δ 8.21 (dd, *J* = 8.0, 1.7 Hz, 1H), 7.66 (d, *J* = 8.0 Hz, 1H), 7.60 (dd, *J* = 7.9, 1.3 Hz, 1H), 7.44 (ddd, *J* = 7.9, 7.2, 1.7 Hz, 1H), 7.39 – 7.30 (m, 2H), 7.13 (dd, *J* = 8.0, 2.0 Hz, 1H), 4.38 (d, *J* = 1.9 Hz, 2H), 3.86 (q, *J* = 7.1 Hz, 1H), 1.55 (d, *J* = 7.1 Hz, 3H).

**<sup>13</sup>C NMR** (101 MHz, Chloroform-*d*) δ 191.83, 191.06, 139.88, 139.38, 138.76, 136.19, 135.11, 132.80, 132.13, 131.70, 131.01, 129.37, 127.70 (q, *J* = 310.5 Hz), 127.14, 127.10, 54.80 (q, *J* = 2.7 Hz), 51.16, 17.91.

**<sup>19</sup>F NMR** (376 MHz, Chloroform-*d*): δ -40.31.

**Physical State:** yellowish oil.

**HRMS (APPI/LTQ-Orbitrap)** *m/z*: [M]<sup>+</sup> Calcd for C<sub>18</sub>H<sub>14</sub>F<sub>3</sub>O<sub>2</sub>S<sub>2</sub><sup>+</sup> 383.0382; Found 383.0380.

**S-(trifluoromethyl) 2-(4-isobutylphenyl)propanethioate (6h)**

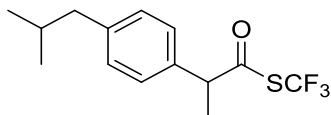

Following the General Procedure with the corresponding carboxylic acid (0.2 mmol). The crude product purified by flash column chromatography, using *n*-pentane/diethyl ether =20/1 (v/v) as an eluent, to yield the title compound **6h** (38 mg) in 66%.

**<sup>1</sup>H NMR** (400 MHz, Chloroform-*d*): δ 7.17 (d, *J* = 2.3 Hz, 4H), 3.84 (q, *J* = 7.1 Hz, 1H), 2.49 (d, *J* = 7.2 Hz, 2H), 1.87 (dp, *J* = 13.6, 7.0 Hz, 1H), 1.57 (d, *J* = 7.1 Hz, 3H), 0.92 (d, *J* = 6.6 Hz, 6H).

**<sup>13</sup>C NMR** (101 MHz, Chloroform-*d*): δ 192.87, 142.32, 134.23, 129.90, 128.24, 127.90 (q, *J* = 310.1 Hz), 54.87 (q, *J* = 2.5 Hz), 45.07, 30.16, 22.35, 17.57.

**<sup>19</sup>F NMR** (376 MHz, Chloroform-*d*): δ -40.59.

**Physical State:** yellowish oil.

**HRMS (APPI/LTQ-Orbitrap)** *m/z*: [M]<sup>+</sup> Calcd for C<sub>14</sub>H<sub>17</sub>F<sub>3</sub>OS<sup>+</sup> 290.0947; Found 290.0942.

***S*-(trifluoromethyl) 2-(3-benzoylphenyl)propanethioate (6i)**

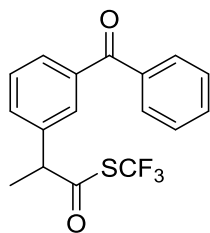

Following the General Procedure with the corresponding carboxylic acid (0.2 mmol). The crude product purified by flash column chromatography, using *n*-pentane/diethyl ether =20/1 (v/v) as an eluent, to yield the title compound **6i** (42 mg) in 62%.

**<sup>1</sup>H NMR** (400 MHz, Chloroform-*d*): δ 7.88 – 7.68 (m, 4H), 7.63 (d, *J* = 7.5 Hz, 1H), 7.57 – 7.45 (m, 4H), 3.95 (q, *J* = 7.1 Hz, 1H), 1.61 (d, *J* = 7.1 Hz, 3H).

**<sup>13</sup>C NMR** (101 MHz, Chloroform-*d*): δ 195.99, 191.93, 138.48, 137.60, 137.17, 132.77, 132.05, 130.21, 130.07, 129.88, 129.22, 128.43, 127.64 (q, *J* = 310.4 Hz), 54.94 (q, *J* = 2.6 Hz), 17.76.

**<sup>19</sup>F NMR** (376 MHz, Chloroform-*d*): δ -40.33.

**Physical State:** yellowish oil.

**HRMS (APPI/LTQ-Orbitrap)** *m/z*: [M + H]<sup>+</sup> Calcd for C<sub>17</sub>H<sub>14</sub>F<sub>3</sub>O<sub>2</sub>S<sup>+</sup> 339.0661; Found 339.0659.

***S*-(trifluoromethyl) (*S*)-2-(6-methoxynaphthalen-2-yl)propanethioate (6j)**

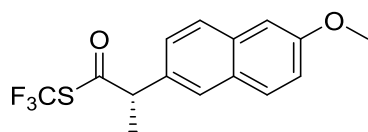

Following the General Procedure with the corresponding carboxylic acid (0.2 mmol). The crude product purified by flash column chromatography, using *n*-pentane/diethyl ether =20/1 (v/v) as an eluent, to yield the title compound **6j** (47 mg) in 75%.

**<sup>1</sup>H NMR** (400 MHz, Chloroform-*d*): δ 7.76 (t, *J* = 9.4 Hz, 2H), 7.68 (d, *J* = 1.9 Hz, 1H), 7.33 (dd, *J* = 8.4, 1.8 Hz, 1H), 7.20 (dd, *J* = 8.9, 2.6 Hz, 1H), 7.15 (d, *J* = 2.5 Hz, 1H), 4.00 (q, *J* = 7.1 Hz, 1H), 3.93 (s, 3H), 1.65 (d, *J* = 7.0 Hz, 3H).

**<sup>13</sup>C NMR** (101 MHz, Chloroform-*d*): δ 192.84, 158.29, 134.43, 132.04, 129.43, 128.89, 127.94, 127.81, 127.62 (q, *J* = 255.3 Hz), 126.19, 119.61, 105.70, 55.38, 55.19 (q, *J* = 2.5 Hz), 17.59.

**<sup>19</sup>F NMR** (376 MHz, Chloroform-*d*): δ -40.55.

**Physical State:** white solide.

**HRMS (APPI/LTQ-Orbitrap)** m/z: [M]<sup>+</sup> Calcd for C<sub>15</sub>H<sub>13</sub>F<sub>3</sub>O<sub>2</sub>S<sup>+</sup> 314.0583; Found 314.0581.

***S*-(trifluoromethyl) 5-(2,5-dimethylphenoxy)-2,2-dimethylpentanethioate (6k)**

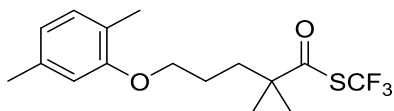

Following the General Procedure with the corresponding carboxylic acid (0.2 mmol). The crude product purified by flash column chromatography, using hexanes/EA = 30/1 (v/v) as an eluent, to yield the title compound **6k** (37 mg) in 56%.

**<sup>1</sup>H NMR** (400 MHz, Chloroform-*d*): δ 7.02 (d, *J* = 7.4 Hz, 1H), 6.68 (d, *J* = 7.0 Hz, 1H), 6.61 (s, 1H), 3.95 (p, *J* = 2.8 Hz, 2H), 2.32 (s, 3H), 2.19 (s, 3H), 1.85 – 1.74 (m, 4H), 1.30 (s, 6H).

**<sup>13</sup>C NMR** (101 MHz, Chloroform-*d*): δ 197.30, 156.89, 136.67, 130.51, 128.43 (q, *J* = 309.4 Hz), 123.68, 121.02, 112.01, 67.46, 51.38 (q, *J* = 2.2 Hz), 37.20, 24.83, 24.72, 21.52, 15.90.

**<sup>19</sup>F NMR** (376 MHz, Chloroform-*d*): δ -40.08.

**Physical State:** white solid.

**HRMS (APPI/LTQ-Orbitrap)** m/z: [M]<sup>+</sup> Calcd for C<sub>16</sub>H<sub>21</sub>F<sub>3</sub>O<sub>2</sub>S<sup>+</sup> 334.1209; Found 334.1209.

***S*-(trifluoromethyl) (1R,4aR,4bR,10aR)-7-isopropyl-1,4a-dimethyl-1,2,3,4,4a,4b,5,6,10,10a-decahydrophenanthrene-1-carbothioate (6l)**

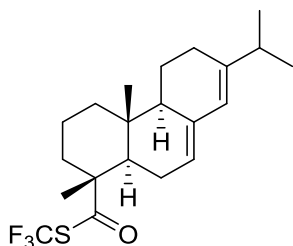

Following the General Procedure with the corresponding carboxylic acid (0.2 mmol). The crude product purified by flash column chromatography, using hexanes/EA = 30/1 (v/v) as an eluent, to yield the title compound **6l** (32 mg) in 42%.

**<sup>1</sup>H NMR** (400 MHz, Chloroform-*d*): δ 5.78 (s, 1H), 5.39 – 5.32 (m, 1H), 2.23 (octet, *J* = 8.0, Hz, 1H), 2.09 – 1.62 (m, 12H), 1.32 (s, 3H), 1.23 – 1.10 (m, 3H), 1.03 (d, *J* = 3.4 Hz, 3H), 1.01 (d, *J* = 3.4 Hz, 3H), 0.84 (s, 3H).

**<sup>13</sup>C NMR** (101 MHz, Chloroform-*d*): δ 198.61, 145.72, 128.50 (q, *J* = 309.5 Hz), 119.78, 55.86, 50.92, 45.81, 38.00, 37.51, 34.91, 27.42, 25.28, 22.53, 21.42, 20.86, 18.00, 16.87, 14.29.

**<sup>19</sup>F NMR** (376 MHz, Chloroform-*d*): δ -40.41.

**Physical State:** colorless oil.

**HRMS (APPI/LTQ-Orbitrap) [M]<sup>+</sup>** Calcd for C<sub>21</sub>H<sub>29</sub>F<sub>3</sub>OS<sup>+</sup> 386.1886; Found 386.1880.

**[1,1'-biphenyl]-4-yl(trifluoromethyl)sulfane (7a)**

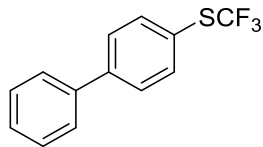

In a nitrogen-filled glovebox, **3a** (1 equiv, 0.1 mmol) was weighed into a 4 mL vial equipped with a 10  $\mu$ m magnetic stir bar. A pre-mixed solution of Pd catalyst and ligand in toluene (0.3 mL) was added. The vial was connected to a reflux condenser, capped with a rubber septum, and this assembly was removed from the glovebox. An argon balloon was placed on top of the condenser and the reaction mixture was stirred at 130 °C. After 20 h, the reaction mixture was cooled to room temperature and diluted with diethyl ether. The resulting solution was filtered through a silica plug and concentrated under reduced pressure. The products were purified via flash column chromatography on silica gel (hexanes/Et<sub>2</sub>O=30/1, v/v).

**<sup>1</sup>H NMR** (400 MHz, Chloroform-*d*):  $\delta$  7.79 (dd,  $J$  = 16.6, 8.4 Hz, 2H), 7.66 (dd,  $J$  = 15.0, 7.9 Hz, 4H), 7.51 (t,  $J$  = 7.6 Hz, 2H), 7.47 – 7.41 (m, 1H).

**<sup>13</sup>C NMR** (101 MHz, Chloroform-*d*):  $\delta$  143.9 (s), 139.7 (s), 136.7 (s), 132.7 (q,  $J$  = 308.1 Hz), 129.0 (s), 128.2 (s), 127.2 (s), 123.1 (q,  $J$  = 1.8 Hz).

**<sup>19</sup>F NMR** (376 MHz, Chloroform-*d*):  $\delta$  -42.68 (s, 3F).

**Physical State:** White solid.

**HRMS (APPI/LTQ-Orbitrap) [M+H]<sup>+</sup>** Calcd for C<sub>13</sub>H<sub>10</sub>F<sub>3</sub>S<sup>+</sup> 255.0450; Found 255.0451.

# Tables

## Table S1. Optimization of trifluoromethylthiolating reagent

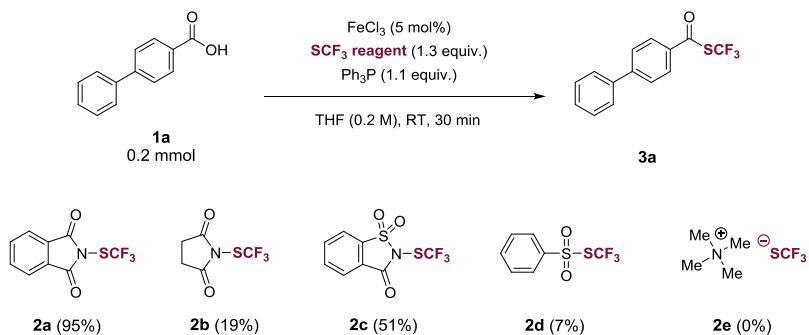

## Table S2. Optimization of solvent

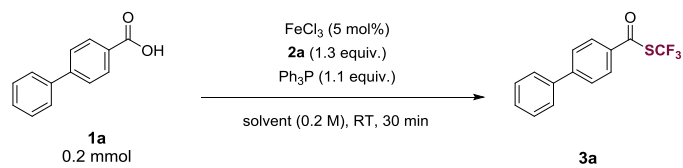

| Entry | Solvent           | GC yield <sup>a</sup> |
|-------|-------------------|-----------------------|
| 1     | THF               | 95%                   |
| 2     | MeCN              | 36%                   |
| 3     | DCM               | 29%                   |
| 4     | DMF               | 18%                   |
| 5     | PhMe              | 70%                   |
| 6     | PhCF <sub>3</sub> | 81%                   |
| 7     | Et <sub>2</sub> O | 55%                   |

**Table S3. Optimization of Lewis acid**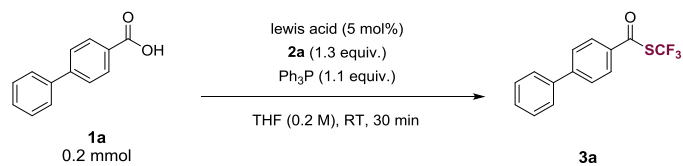

| Entry | Lewis acid                           | GC yield <sup>a</sup> |
|-------|--------------------------------------|-----------------------|
| 1     | none                                 | 40%                   |
| 2     | Sc(OTf) <sub>4</sub>                 | 71%                   |
| 3     | SnCl <sub>4</sub>                    | 69%                   |
| 4     | BF <sub>3</sub> ·OEt (10 mol%)       | 64%                   |
| 5     | AlCl <sub>3</sub>                    | 39%                   |
| 6     | ZnCl <sub>2</sub>                    | 66%                   |
| 7     | CeCl <sub>3</sub>                    | 41%                   |
| 8     | Ce(OTf) <sub>4</sub>                 | 45%                   |
| 9     | Fe(acac) <sub>3</sub>                | 39%                   |
| 10    | FeCl <sub>3</sub> ·6H <sub>2</sub> O | 71%                   |
| 11    | FeCl <sub>3</sub>                    | 95%                   |
| 12    | Fe(OTf) <sub>3</sub>                 | 62%                   |

**Table S4. Optimization of external base**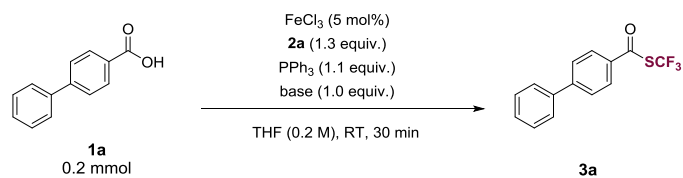

| Entry | Base                             | GC yield <sup>a</sup> |
|-------|----------------------------------|-----------------------|
| 1     | NaHCO <sub>3</sub>               | 69%                   |
| 2     | NaHCO <sub>3</sub> (10 mol%)     | 78%                   |
| 3     | Cs <sub>2</sub> CO <sub>3</sub>  | 40%                   |
| 4     | 2,6-lutidine                     | 68%                   |
| 5     | NaH <sub>2</sub> PO <sub>4</sub> | 42%                   |
| 6     | none                             | 95%                   |

**Table S5. Optimization of R<sub>3</sub>P**

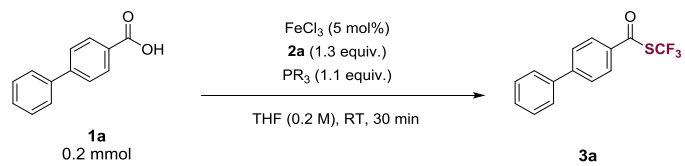

| Entry | R <sub>3</sub> P      | GC yield <sup>a</sup> |
|-------|-----------------------|-----------------------|
| 1     | PPh <sub>3</sub>      | 95%                   |
| 2     | PCy <sub>3</sub>      | 39%                   |
| 3     | P(OEt) <sub>3</sub>   | 12%                   |
| 4     | P(OEt)Ph <sub>2</sub> | 35%                   |
| 5     | none                  | ND                    |



**Table S6.** Optimization of concentration of reagents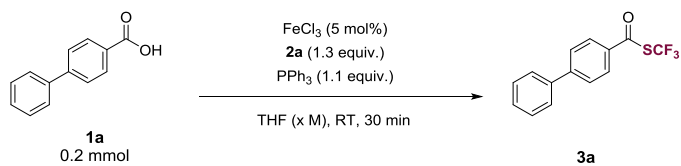

| Entry | x      | GC yield <sup>a</sup> |
|-------|--------|-----------------------|
| 1     | 0.2 M  | 95%                   |
| 2     | 0.1 M  | 81%                   |
| 3     | 0.05 M | 69%                   |
| 4     | 0.4 M  | 89%                   |

**Table S7.** Optimization of  $\text{SCF}_3$  reagent/ $\text{PPh}_3$  ratio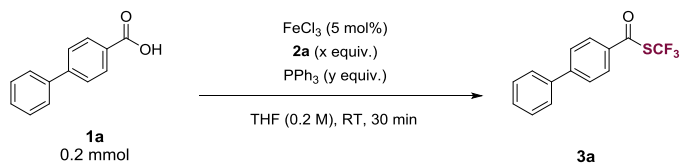

| Entry | x/y ratio | GC yield <sup>a</sup> |
|-------|-----------|-----------------------|
| 1     | 1.3/1.1   | 95%                   |
| 2     | 1.1/1.3   | 76%                   |
| 3     | 1.5/1.3   | 89%                   |
| 4     | 1.8/1.5   | 80%                   |

**Table S8.** Unsuccessful examples

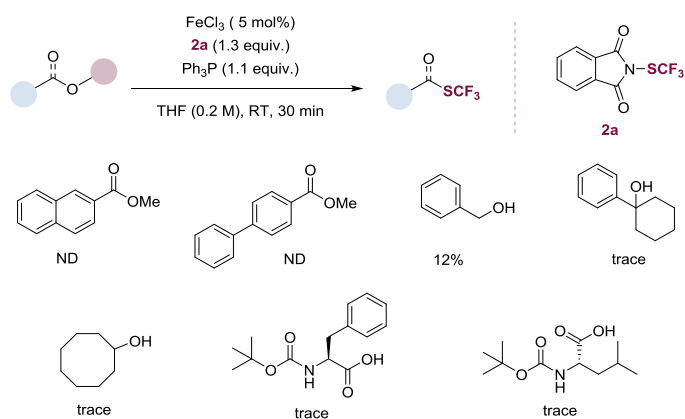

Following the General Procedure with the corresponding substrates (0.2 mmol). Reactions were monitored using GC-MS after 30 minutes, yields mentioned here are GC yields, *n*-dodecane was used as internal standard. ND (not detected).



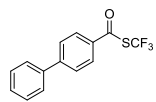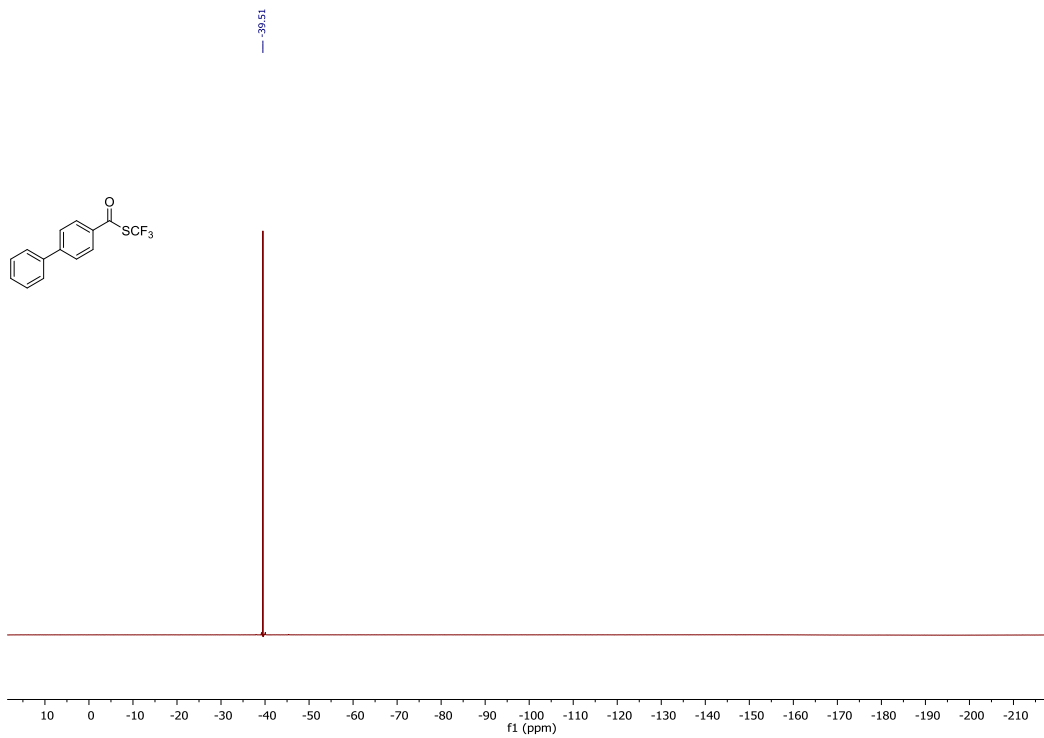

Figure S2. NMR spectra of 3b

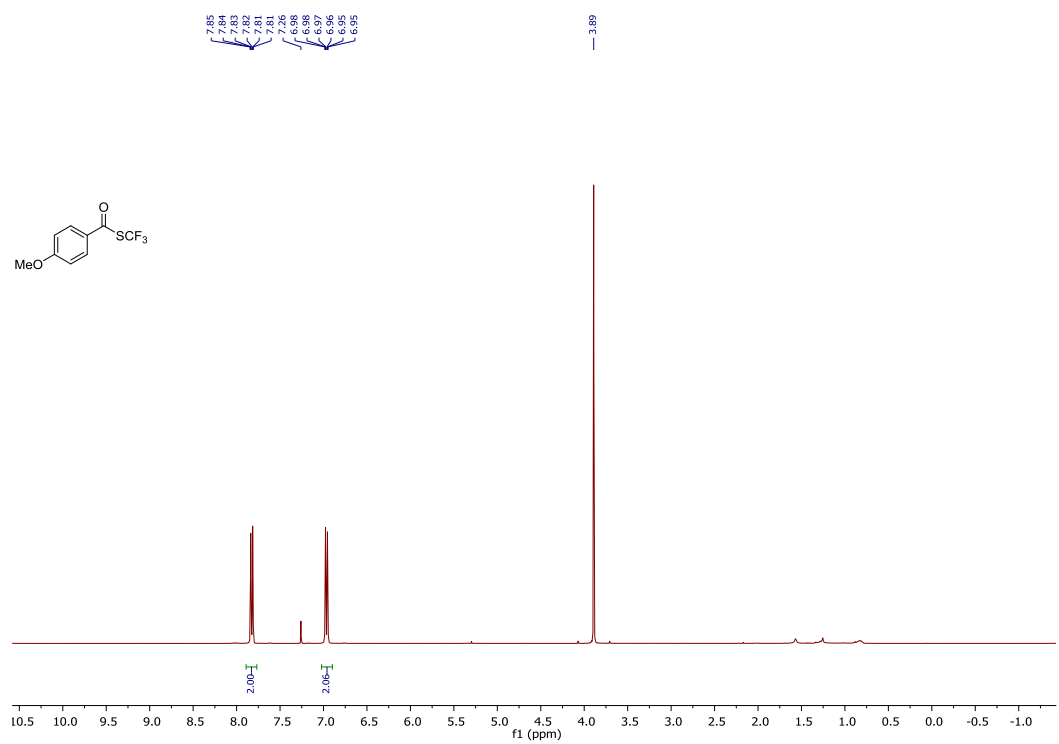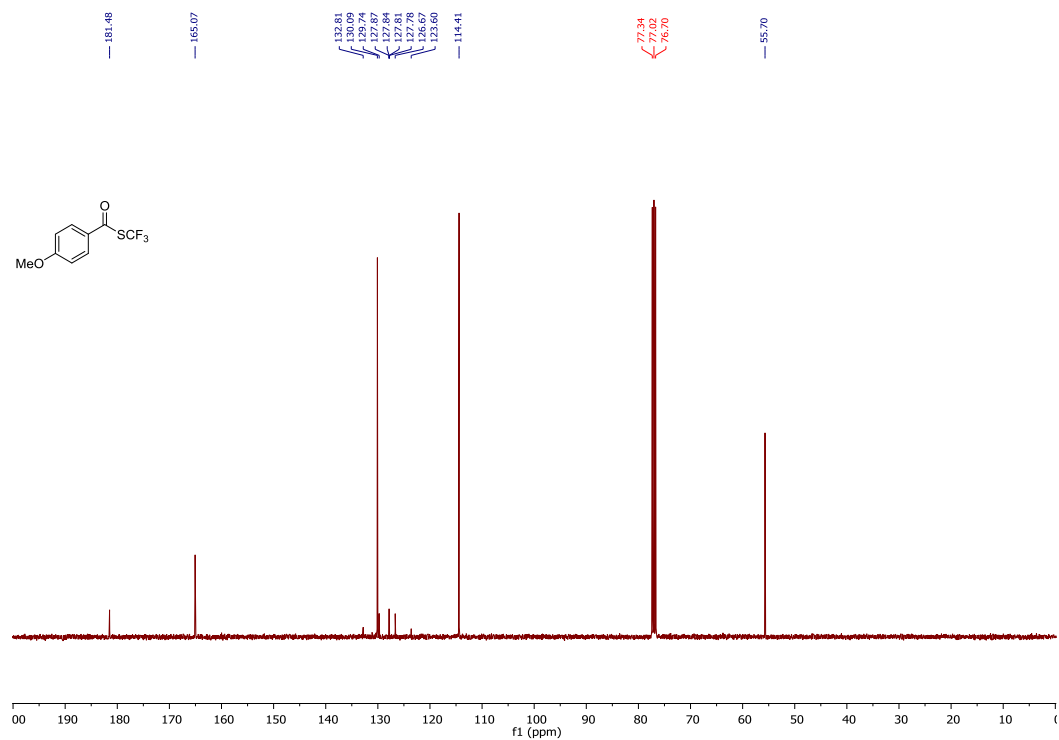

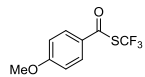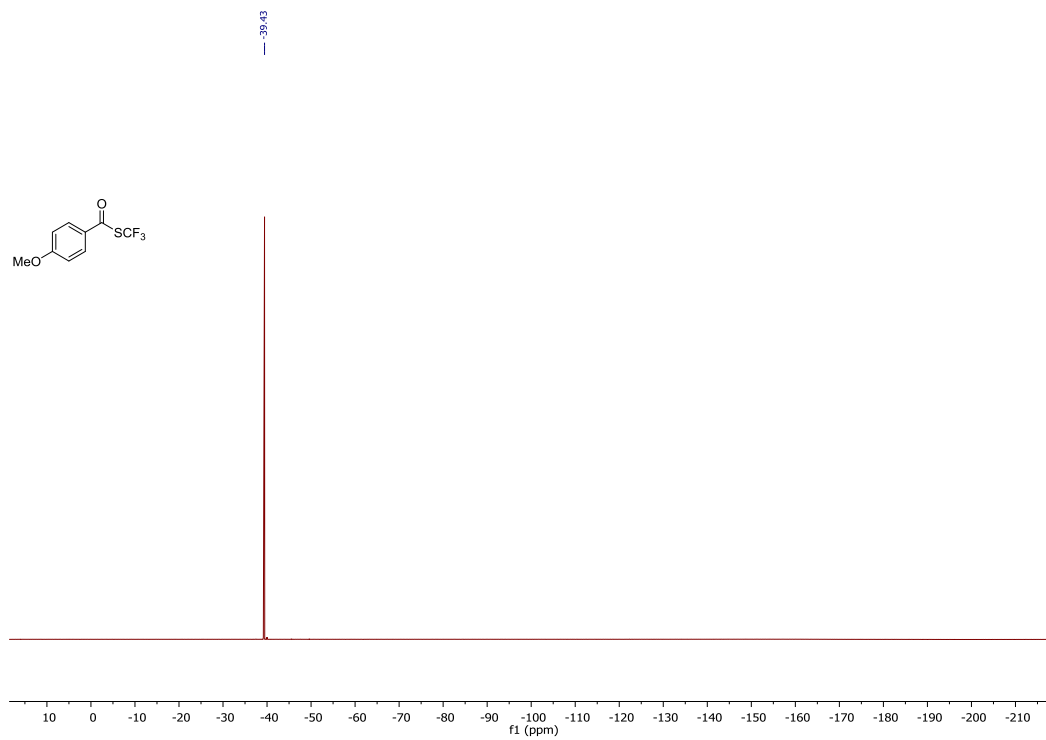

Figure S3. NMR spectra of 3c

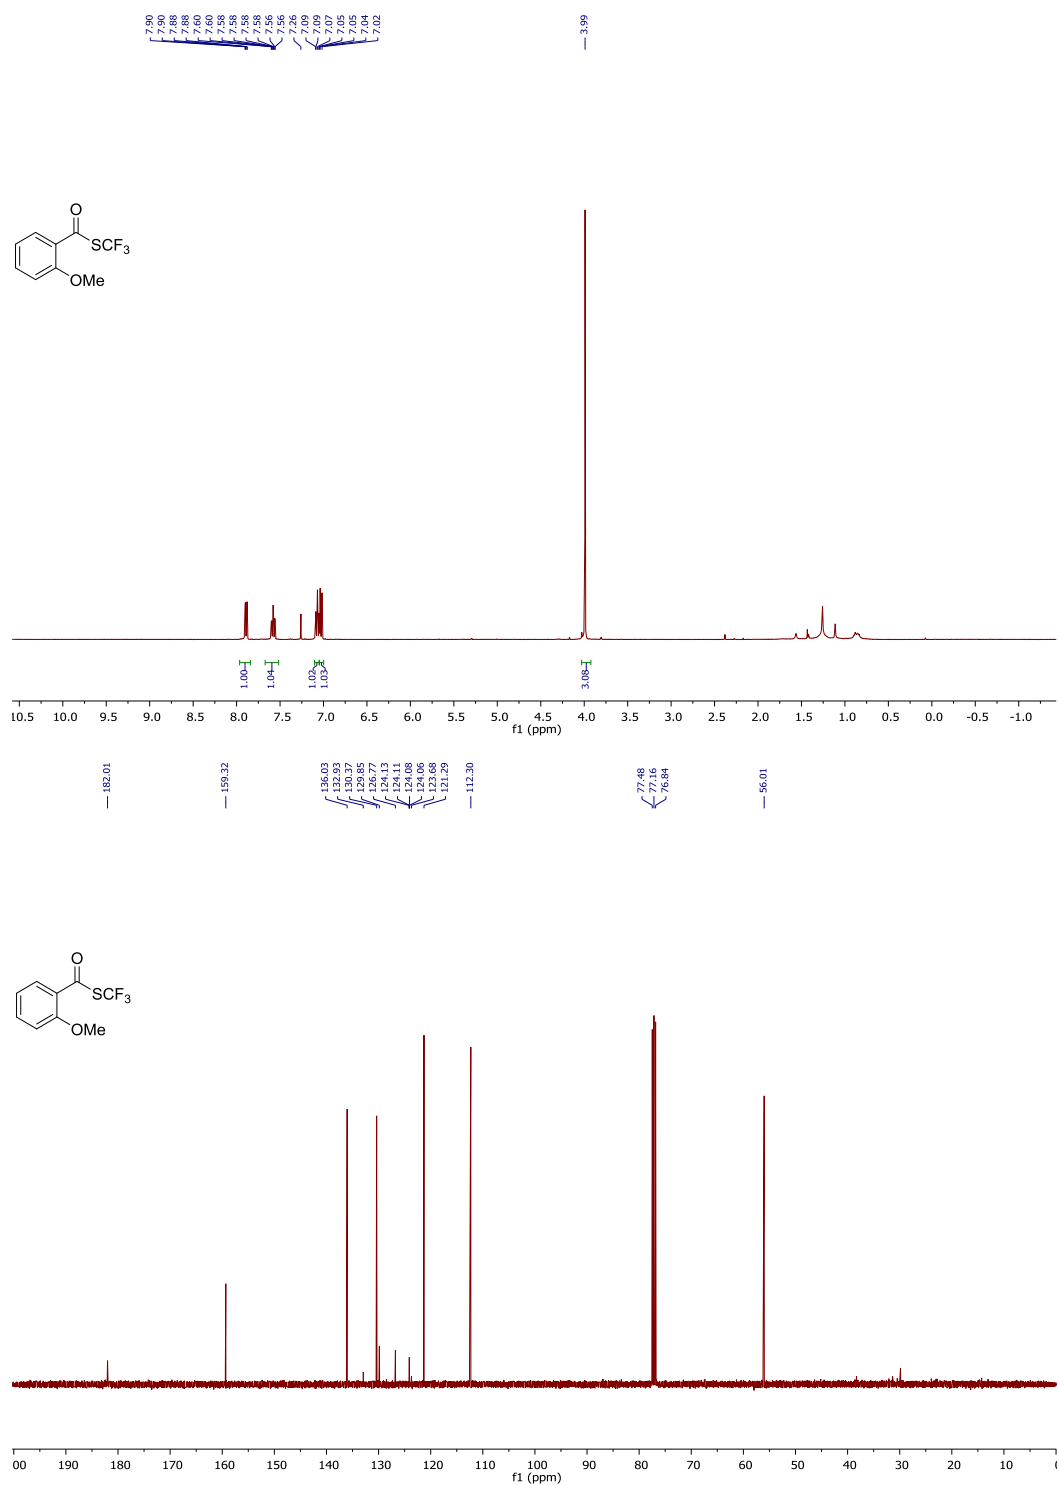

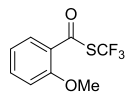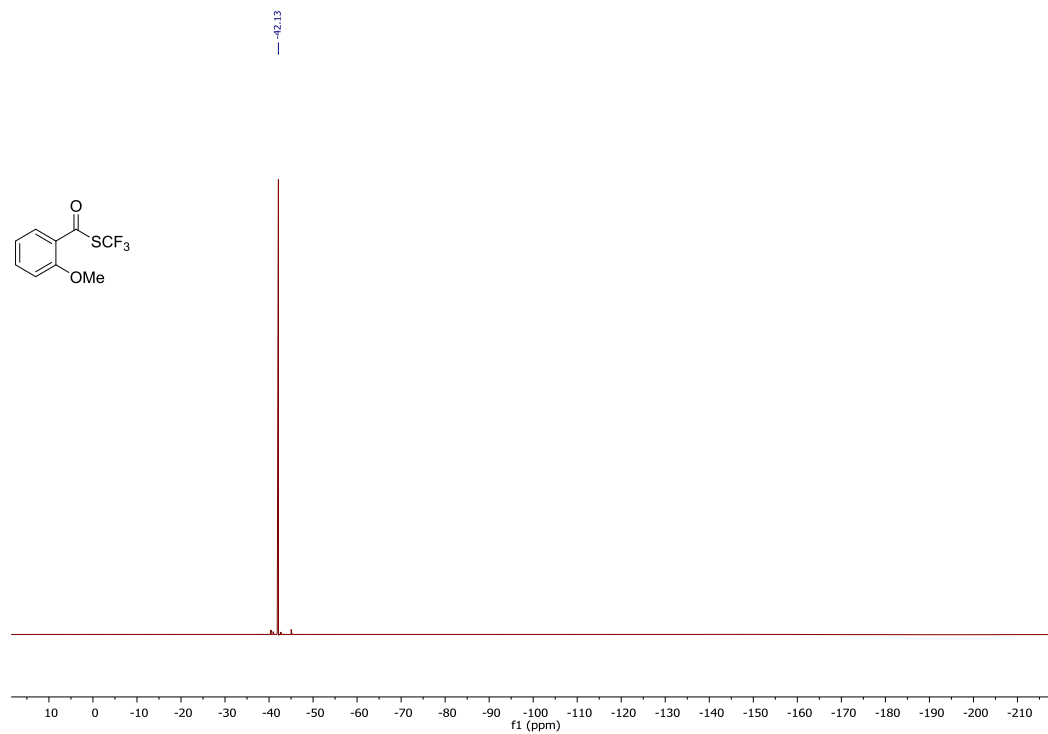



Figure S4. NMR spectra of 3d

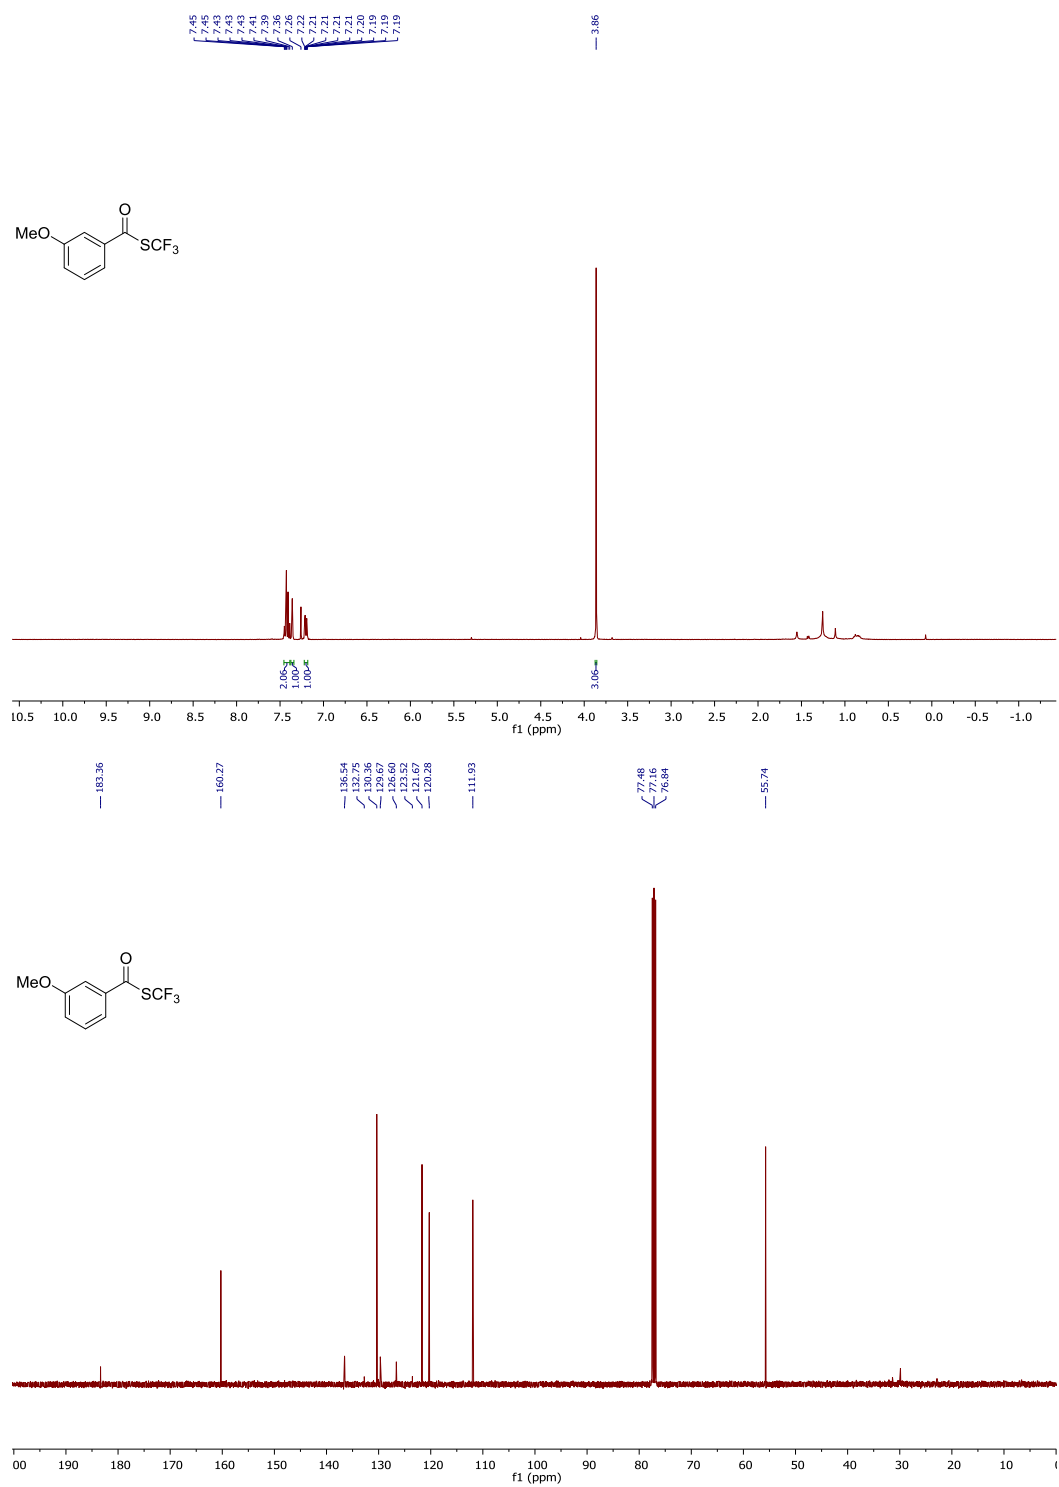

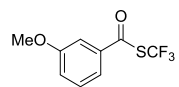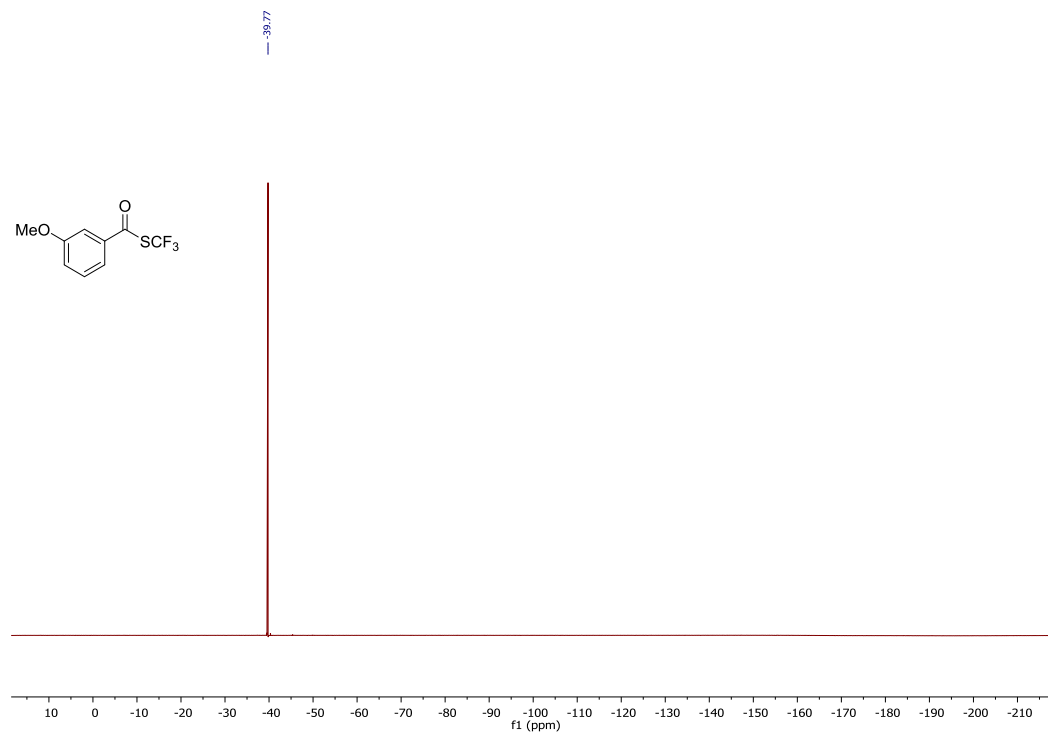

Figure S5. NMR spectra of 3e

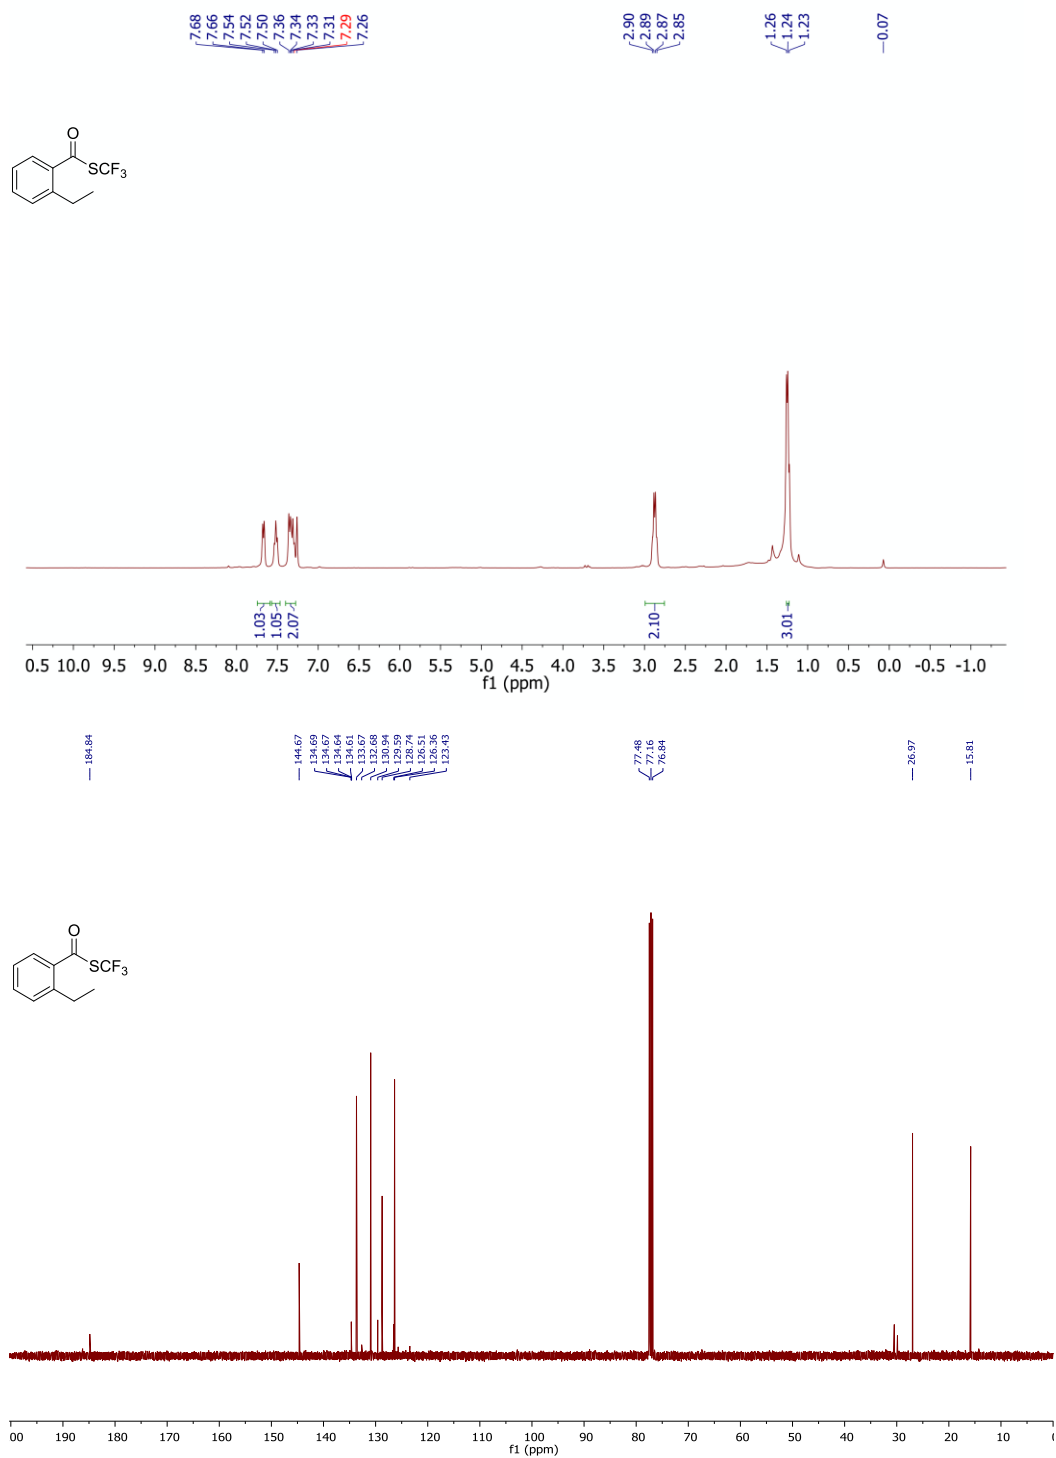

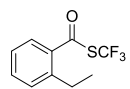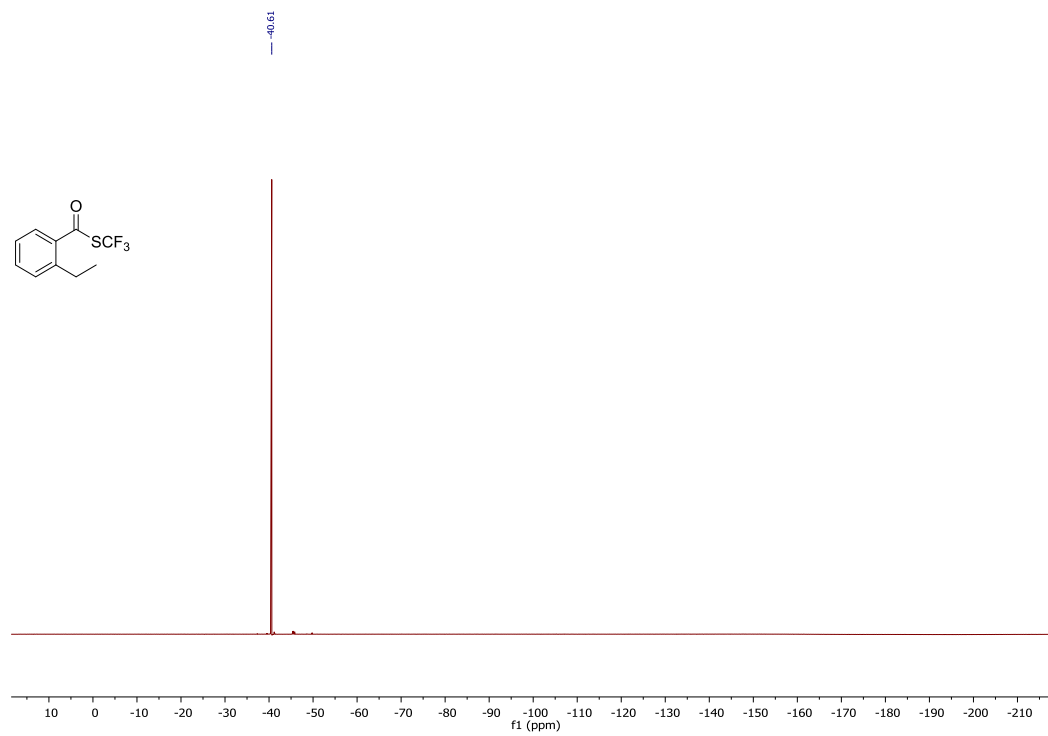

Figure S6. NMR spectra of 3f

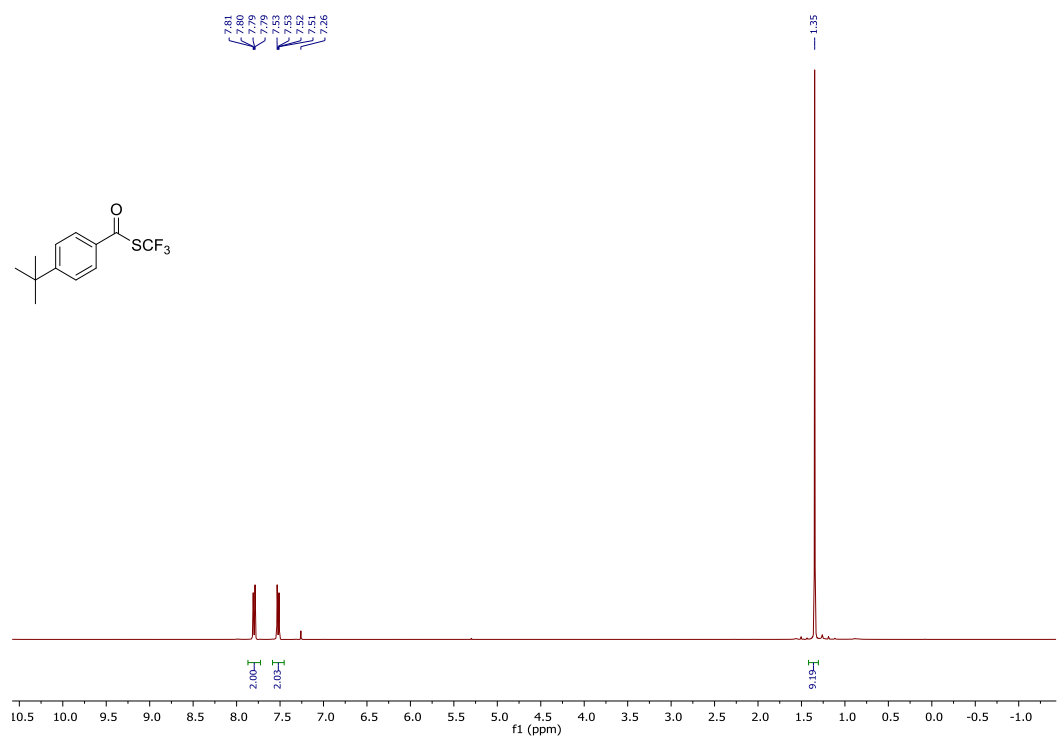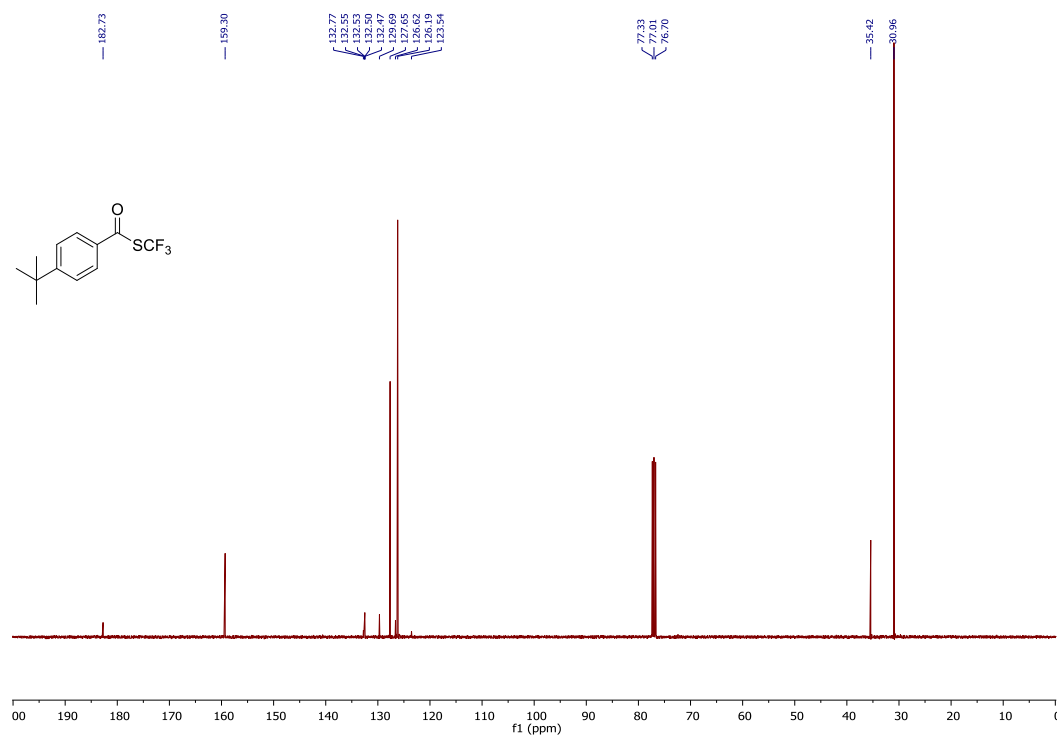

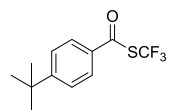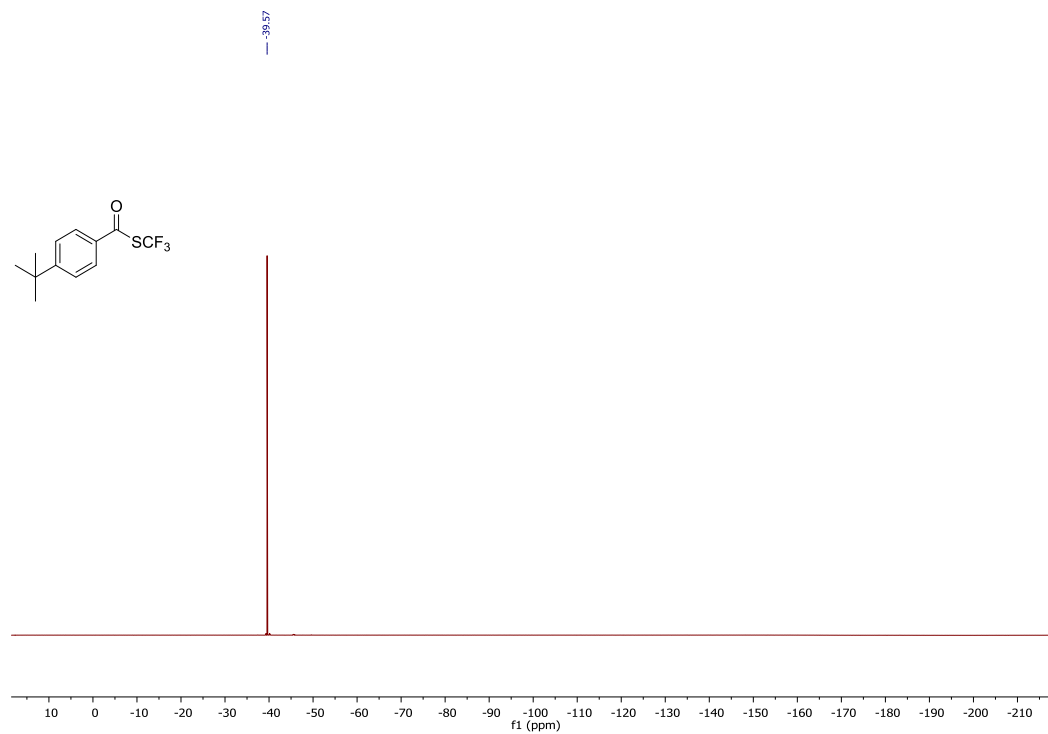

Figure S7. NMR spectra of 3g

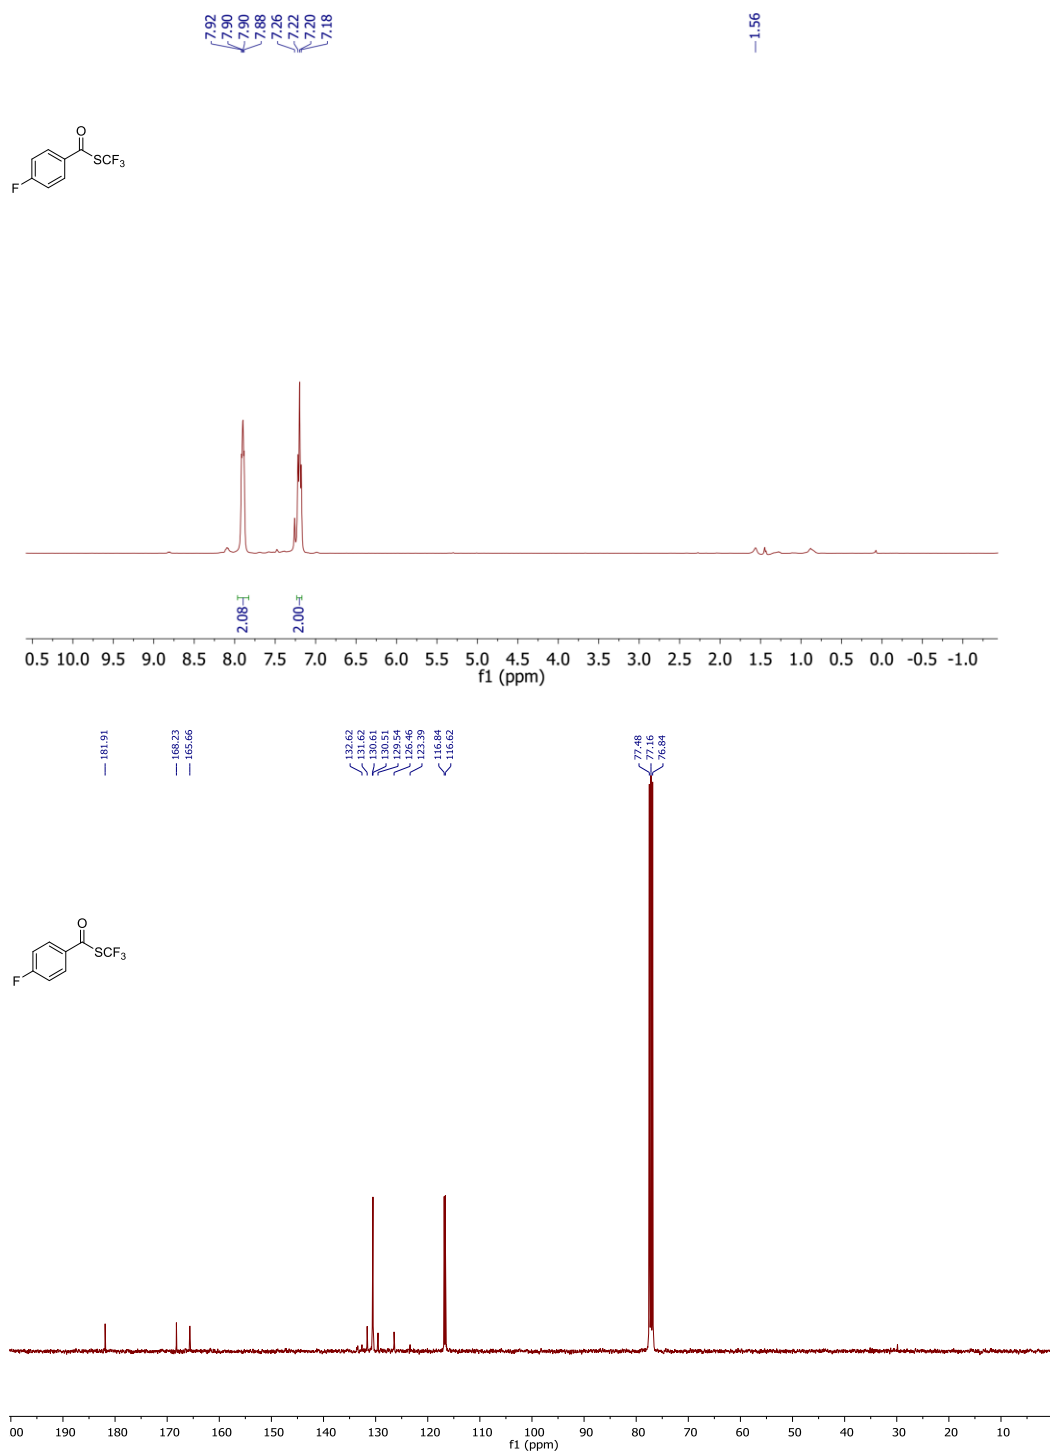

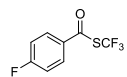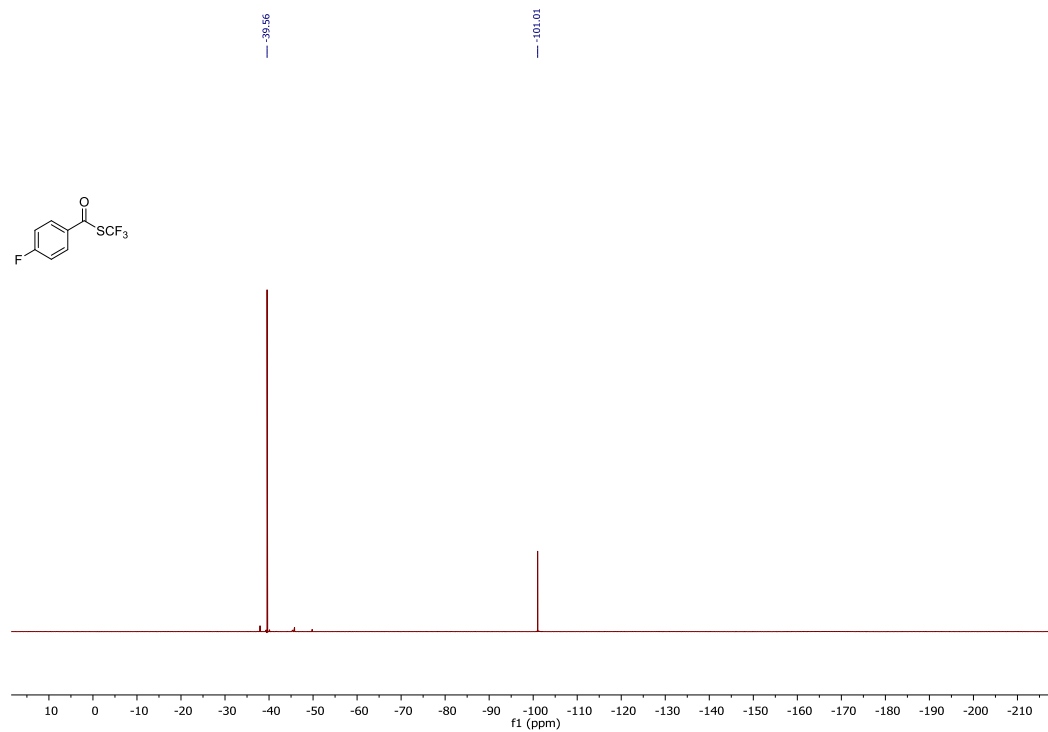



Figure S8. NMR spectra of 3h

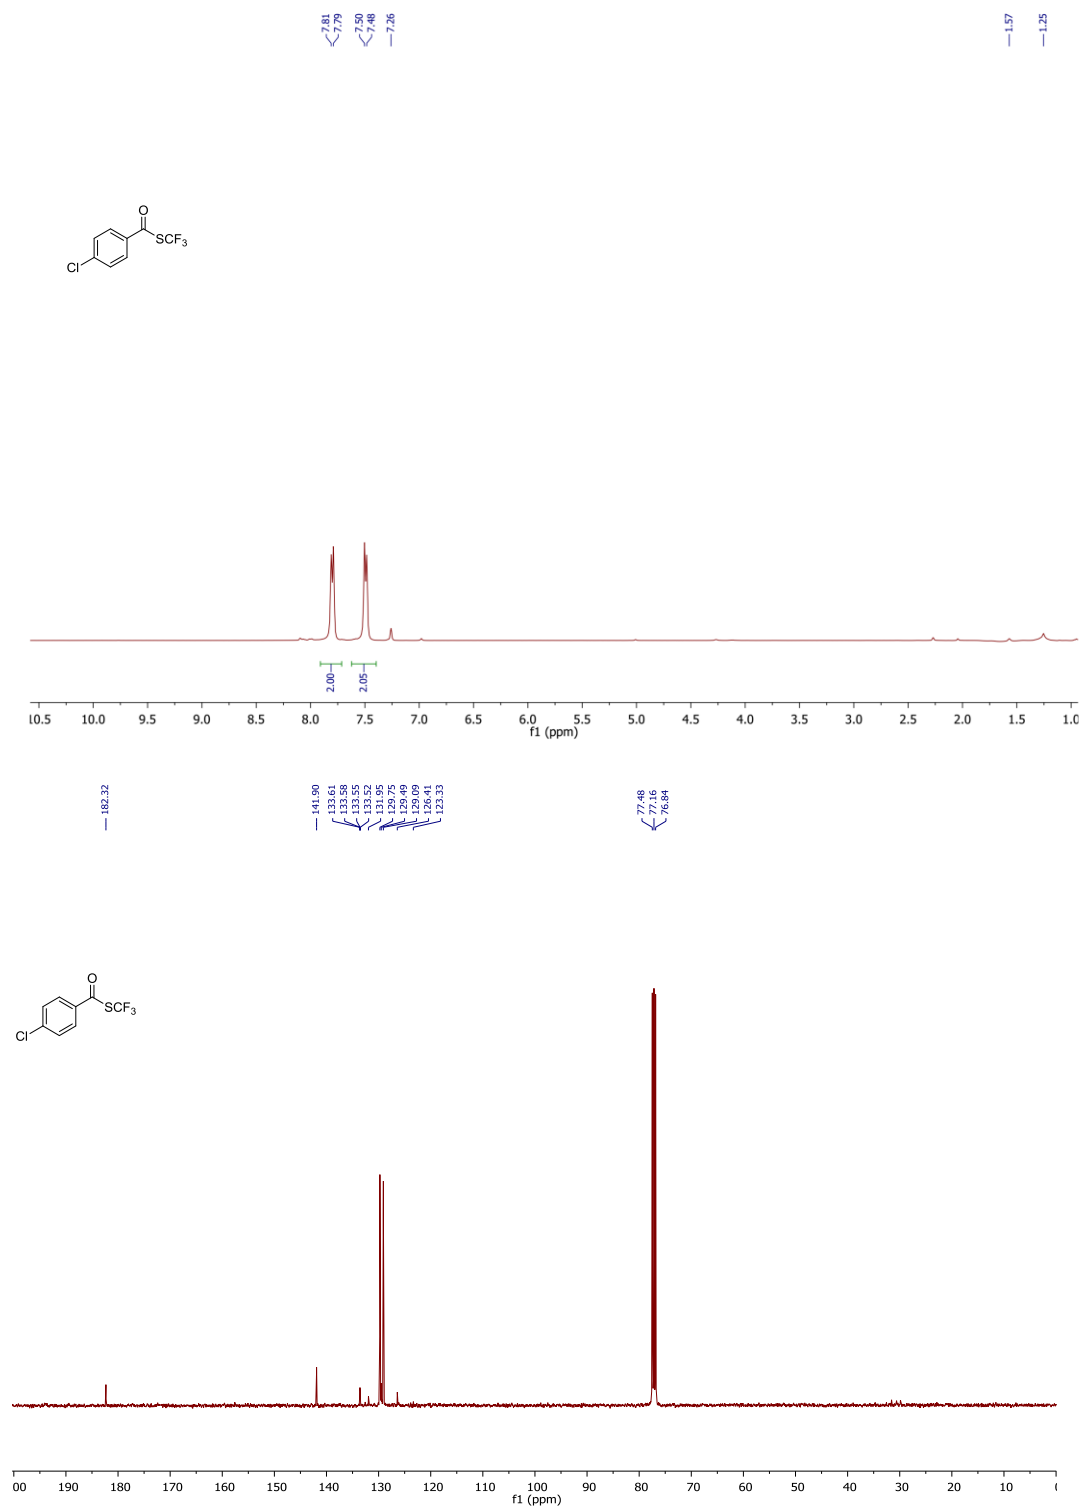

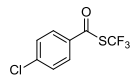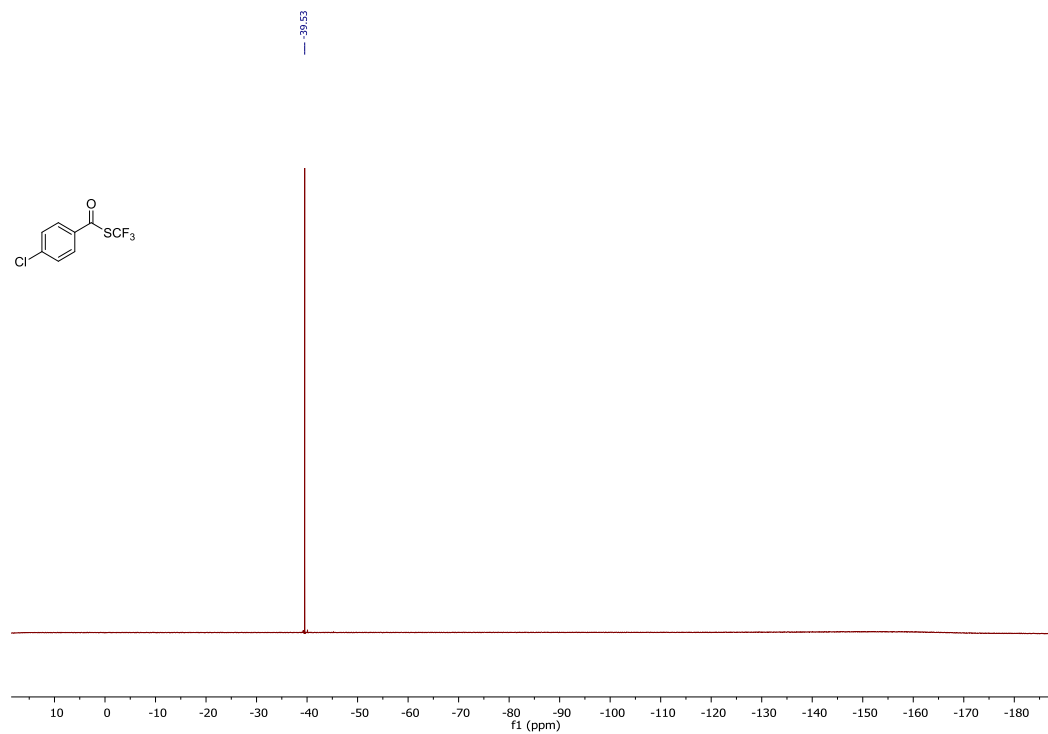

Figure S9. NMR spectra of 3i

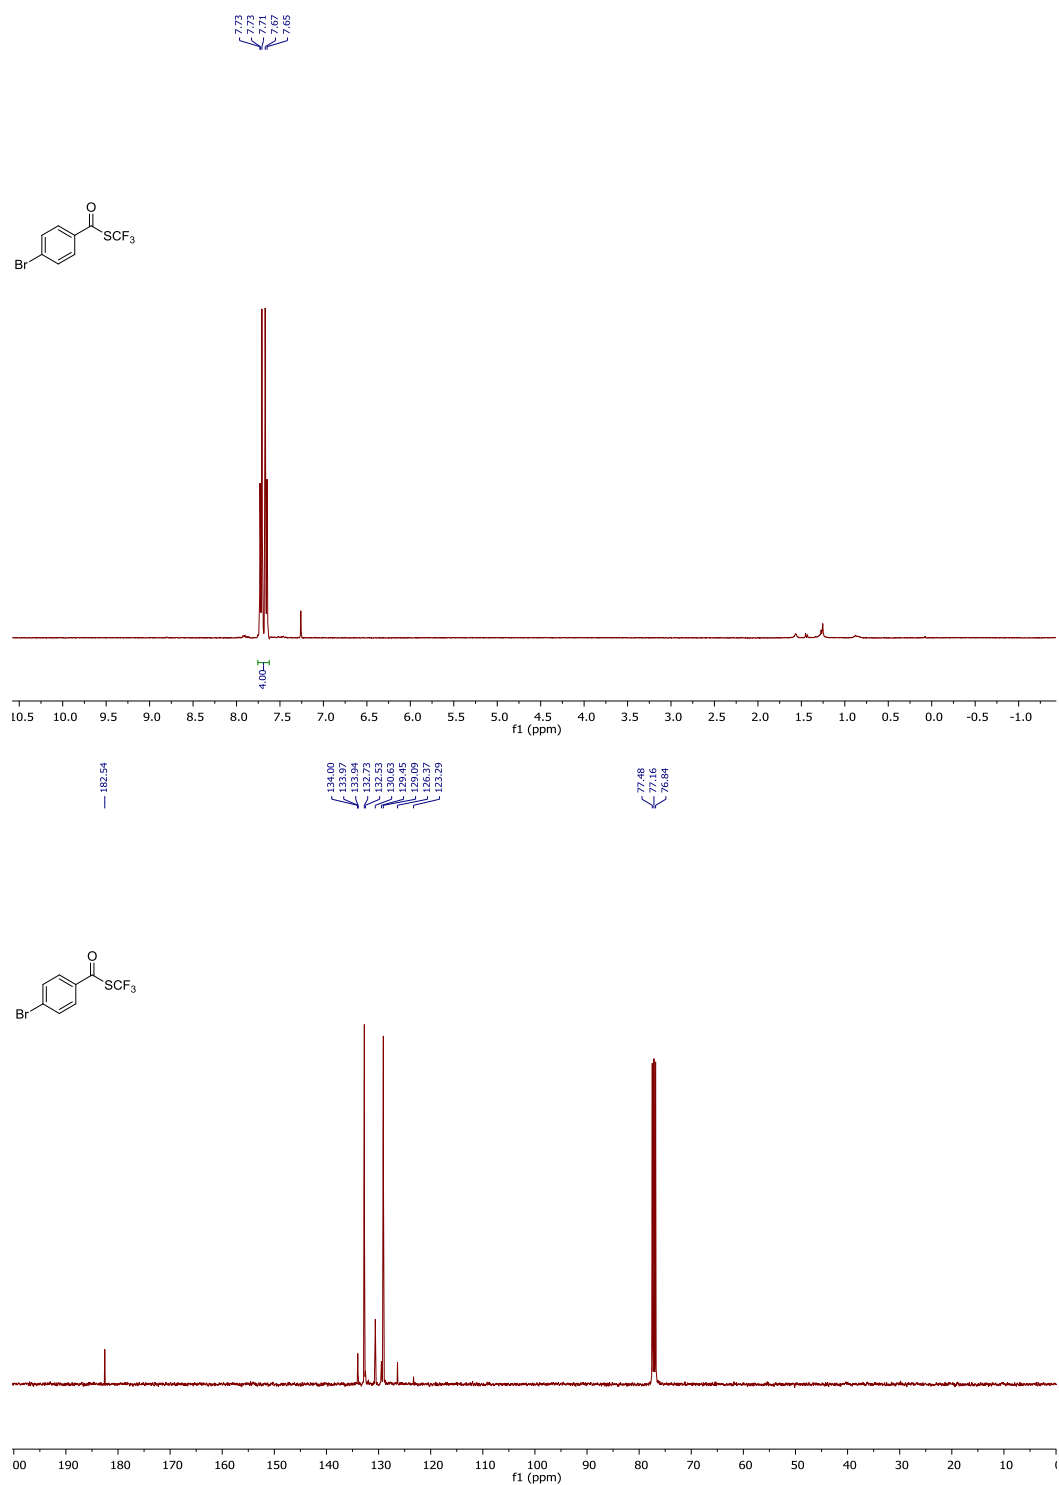

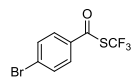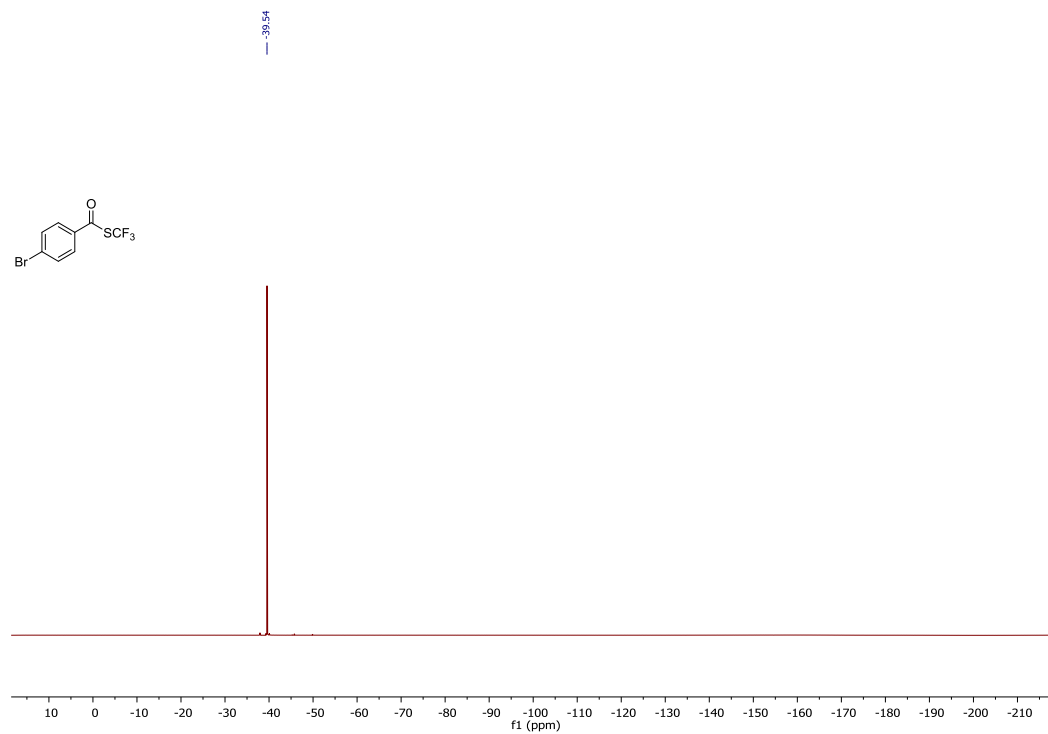

Figure S10. NMR spectra of 3j

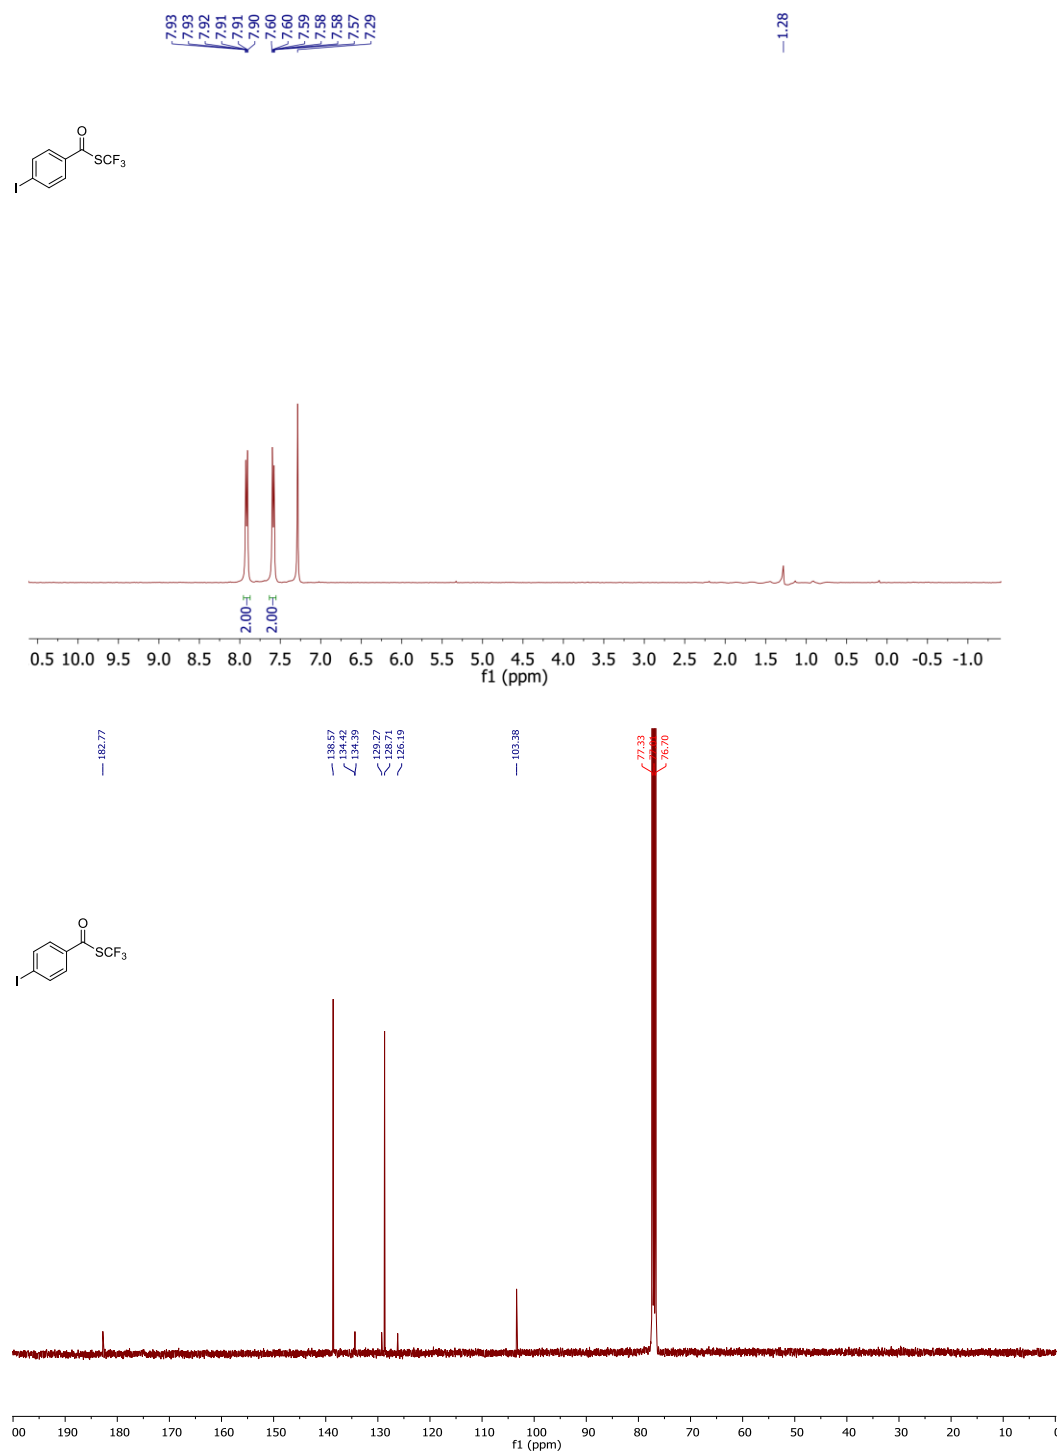

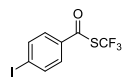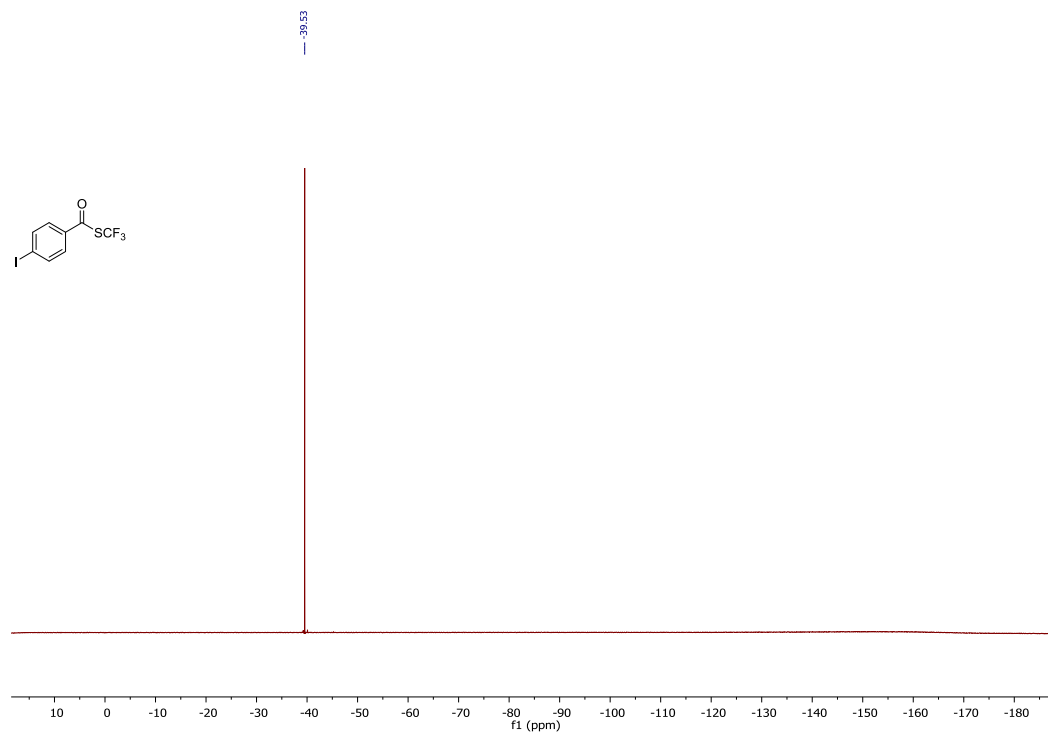

Figure S11. NMR spectra of 3k

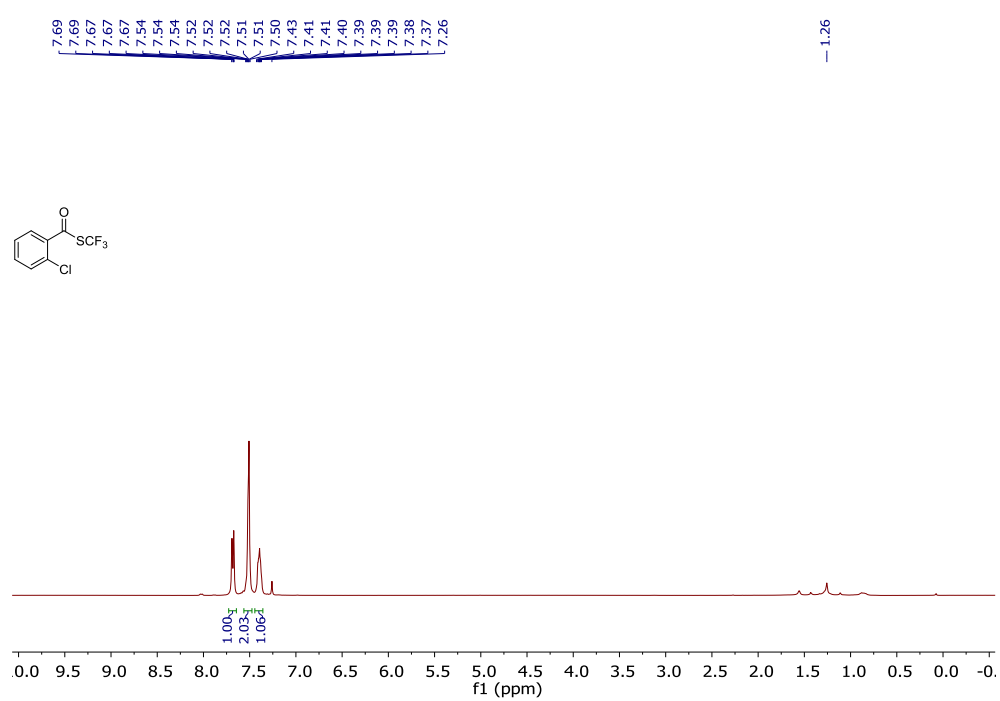

-1.26

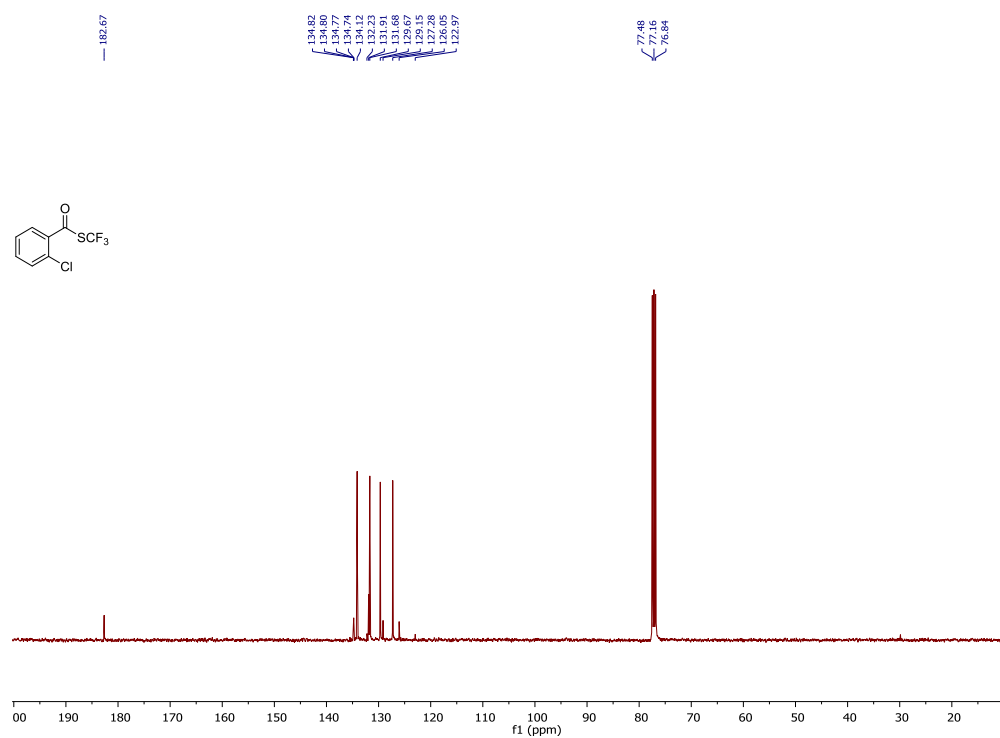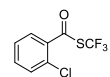

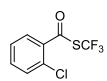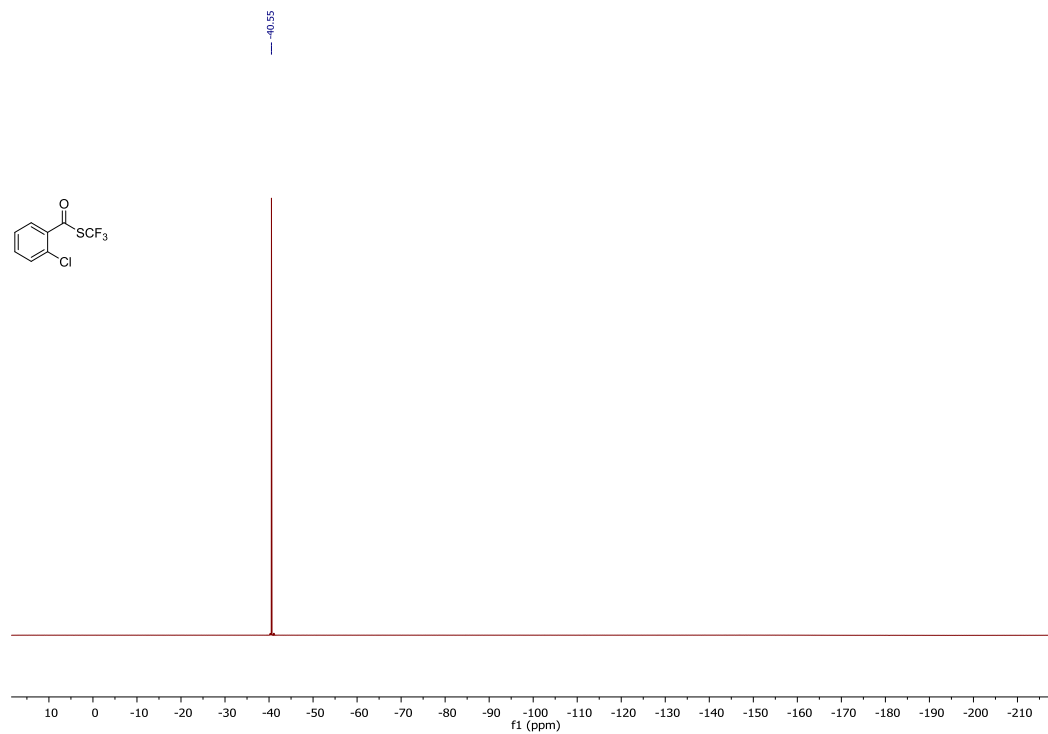



Figure S12. NMR spectra of 3l

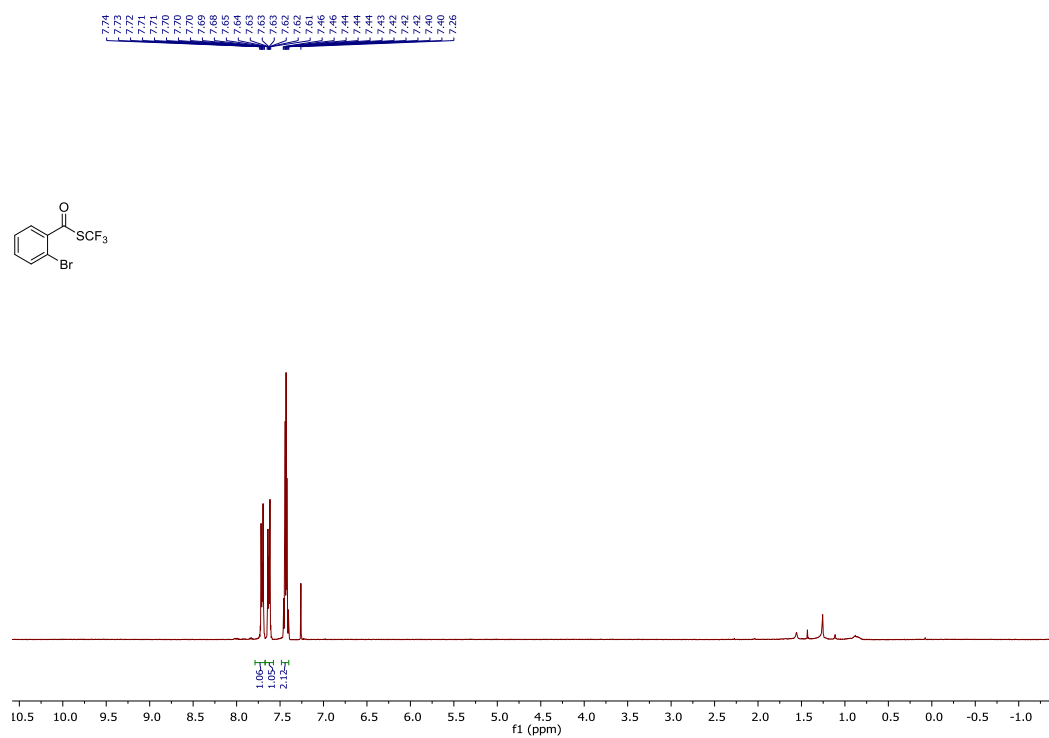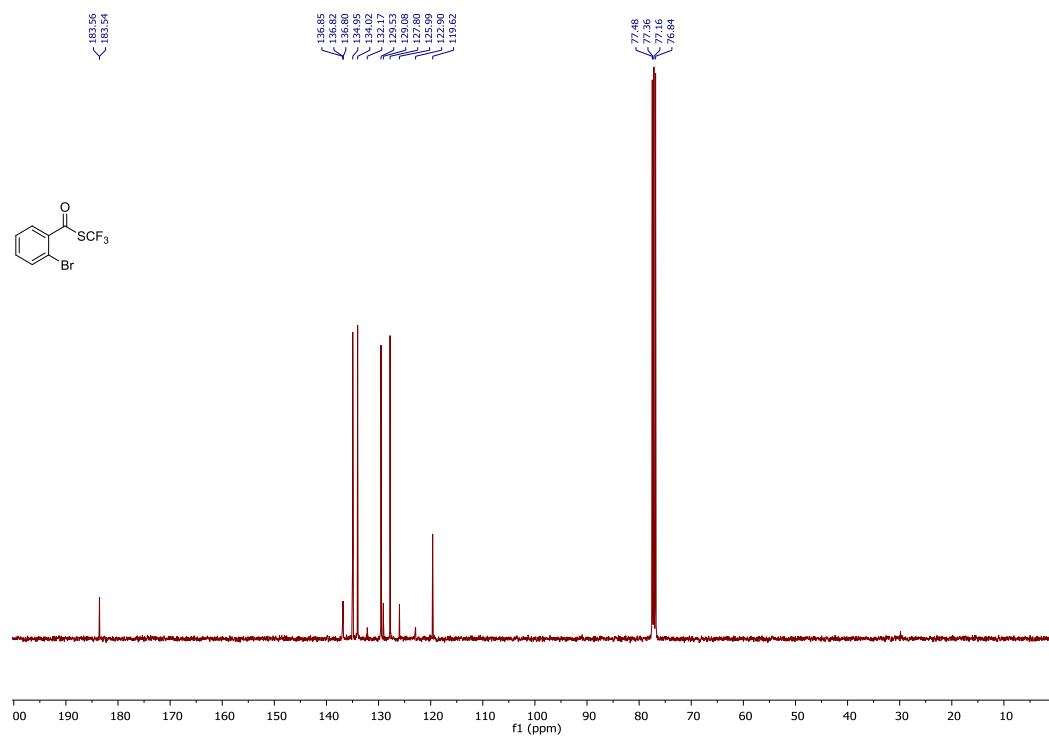

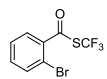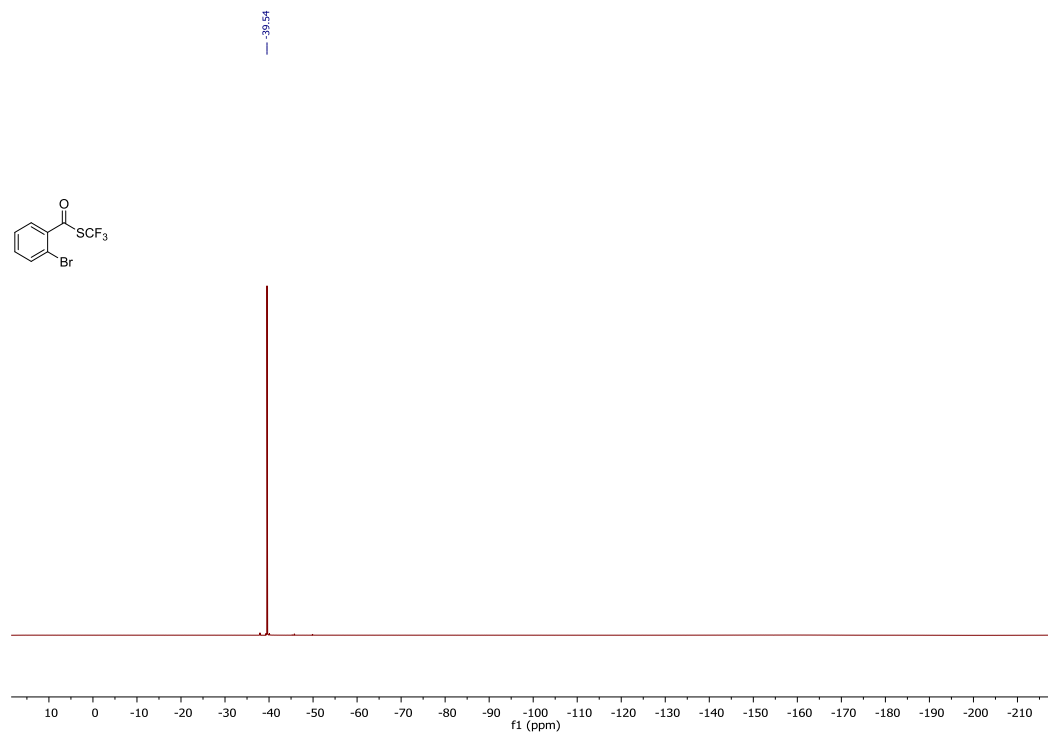

Figure S13. NMR spectra of 3m

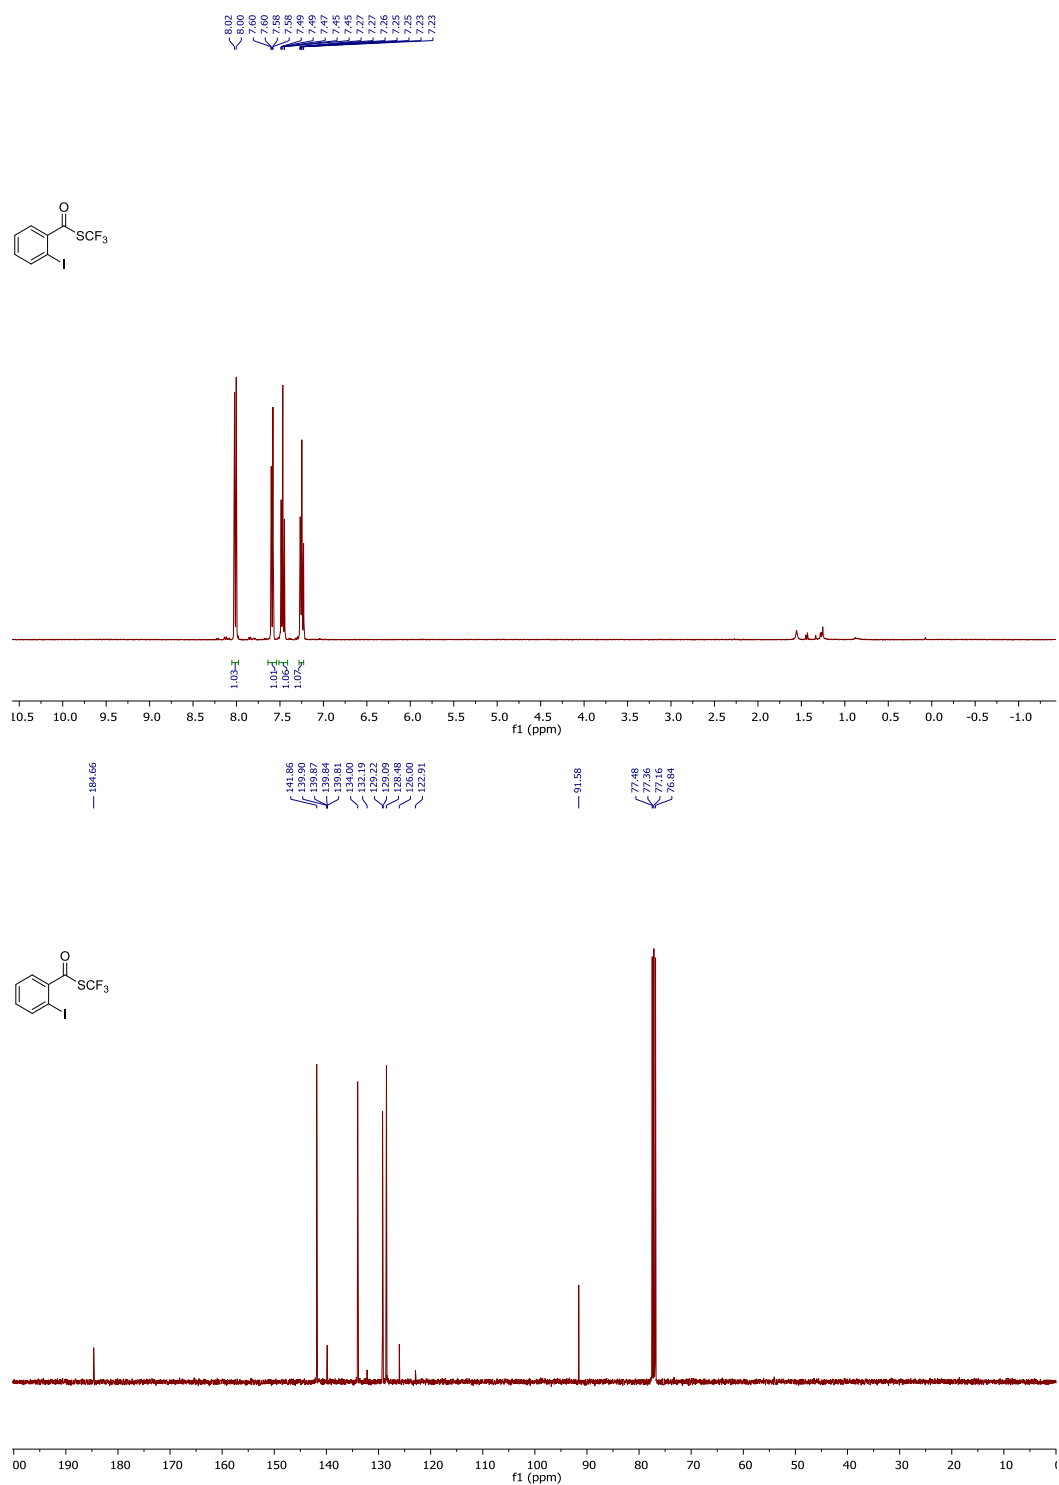

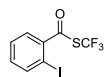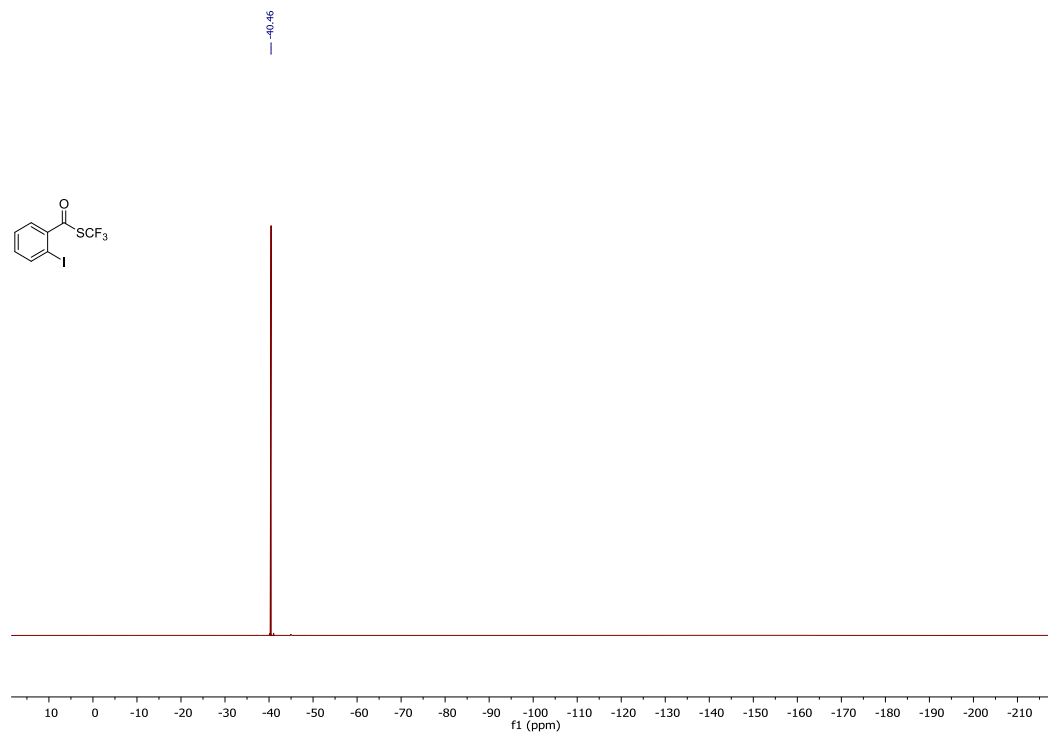

Figure S14. NMR spectra of 3n

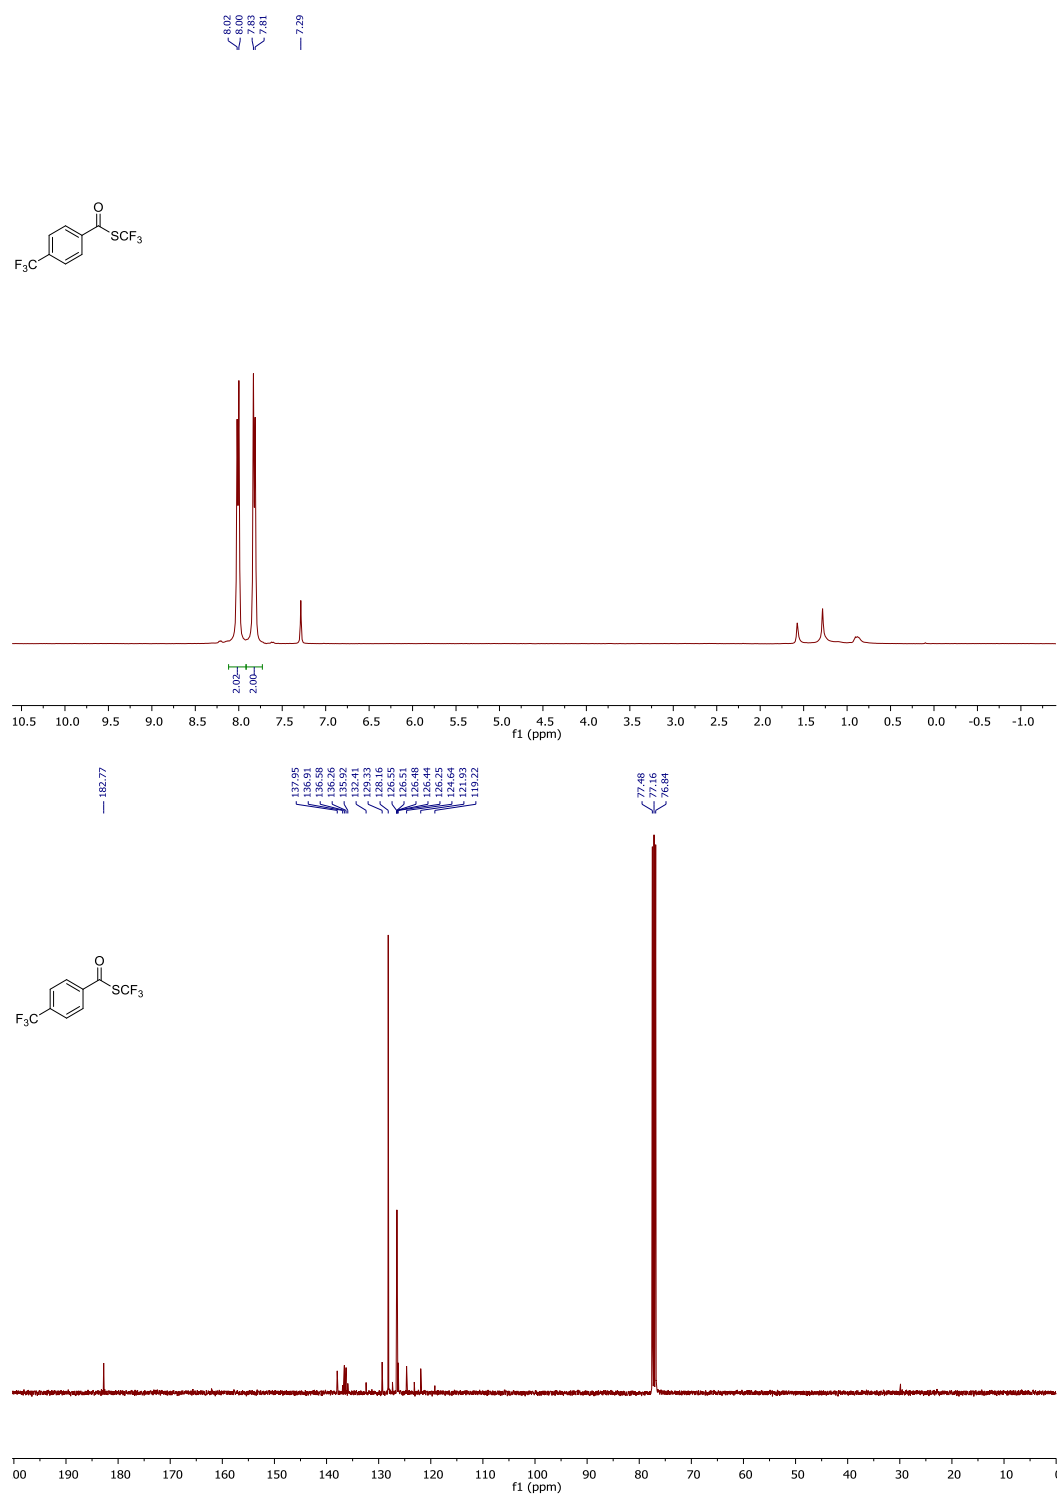

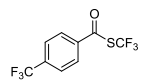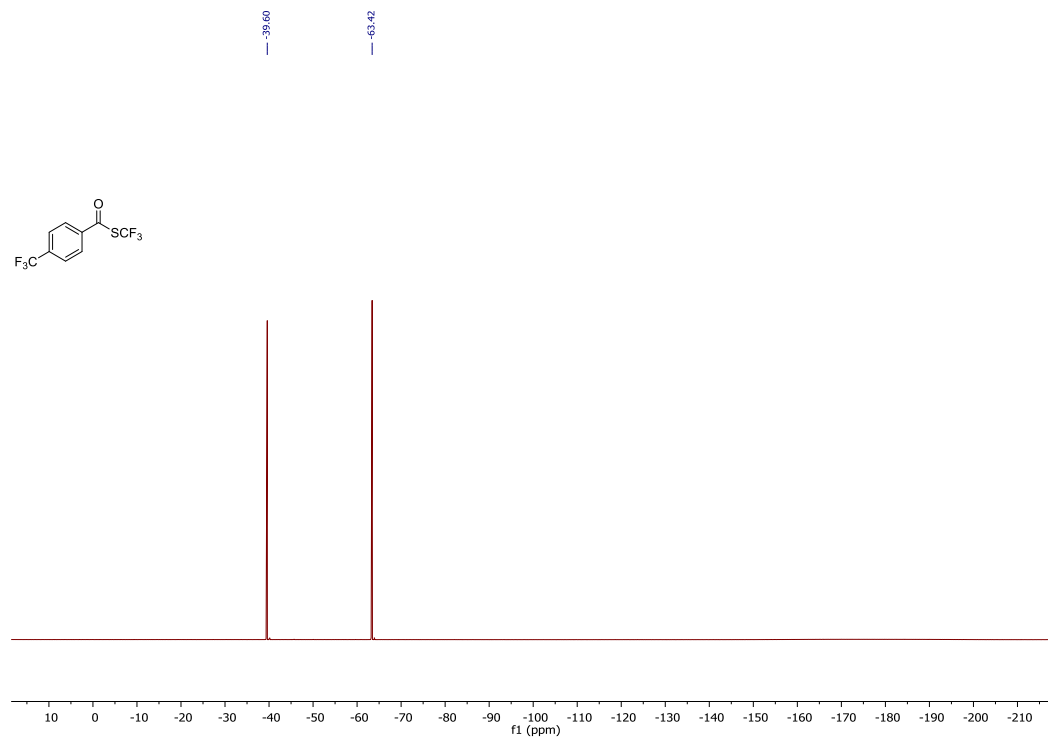

Figure S15. NMR spectra of 3o

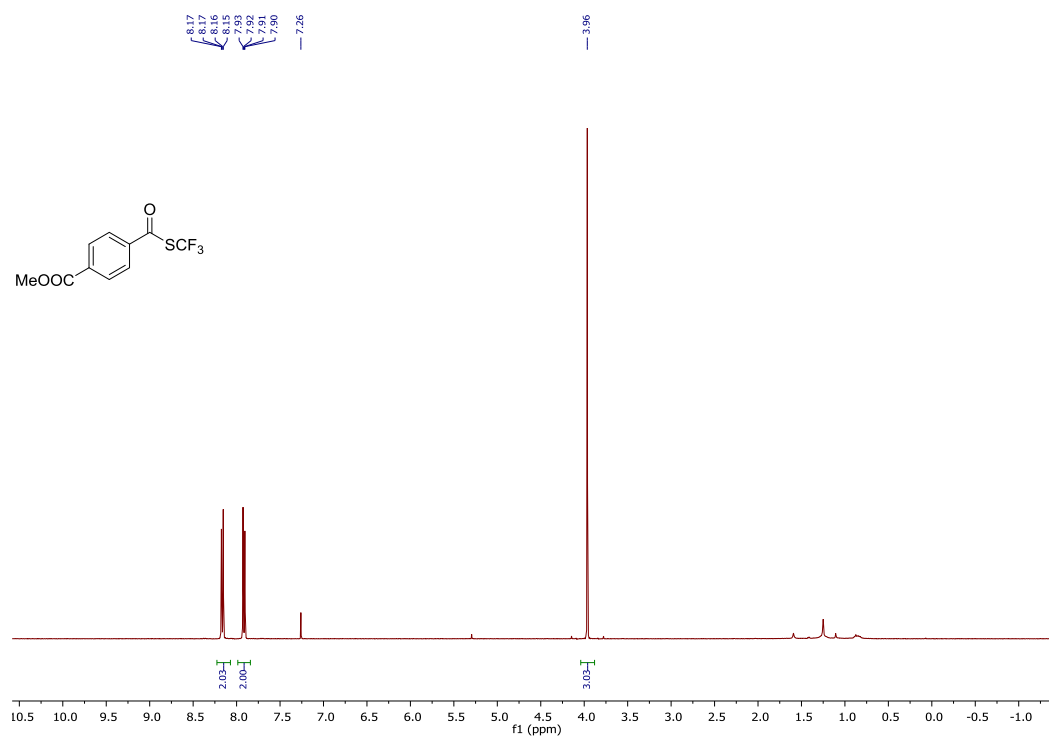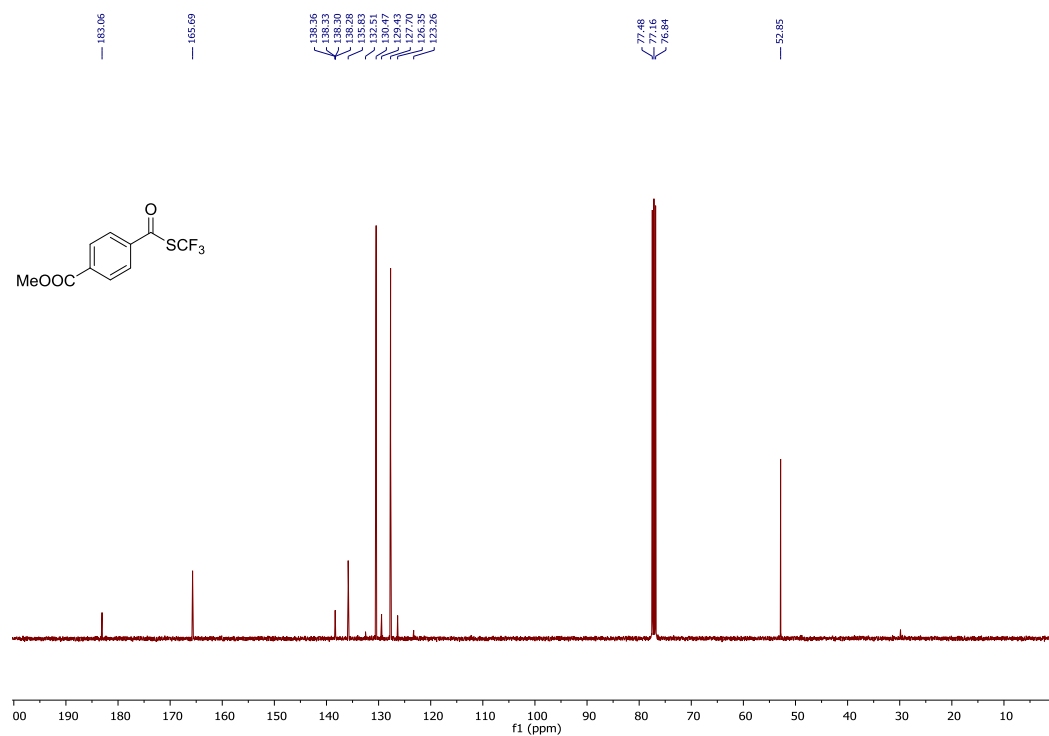

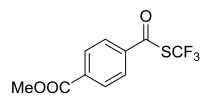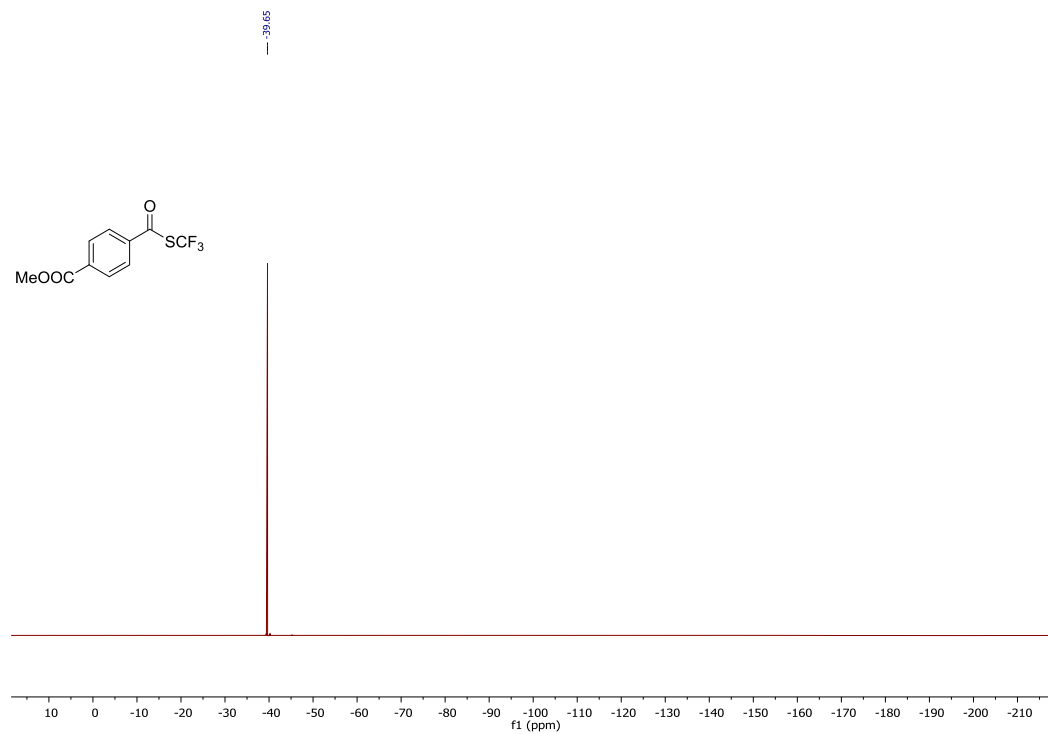



Figure S16. NMR spectra of 3p

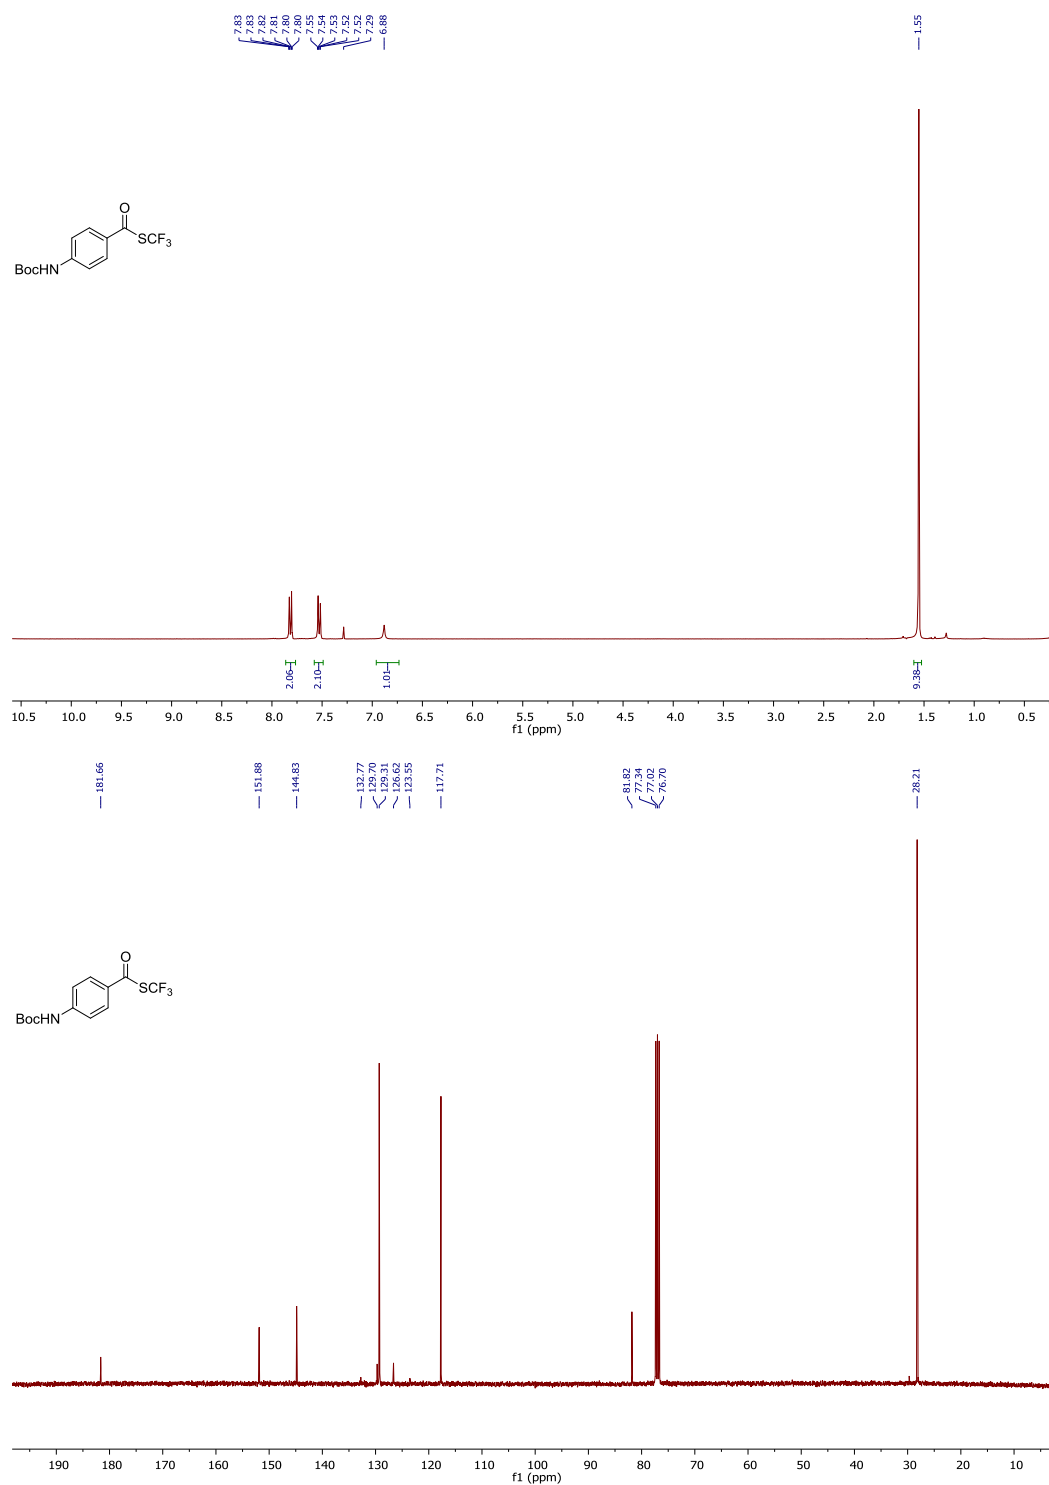

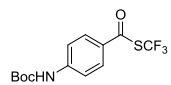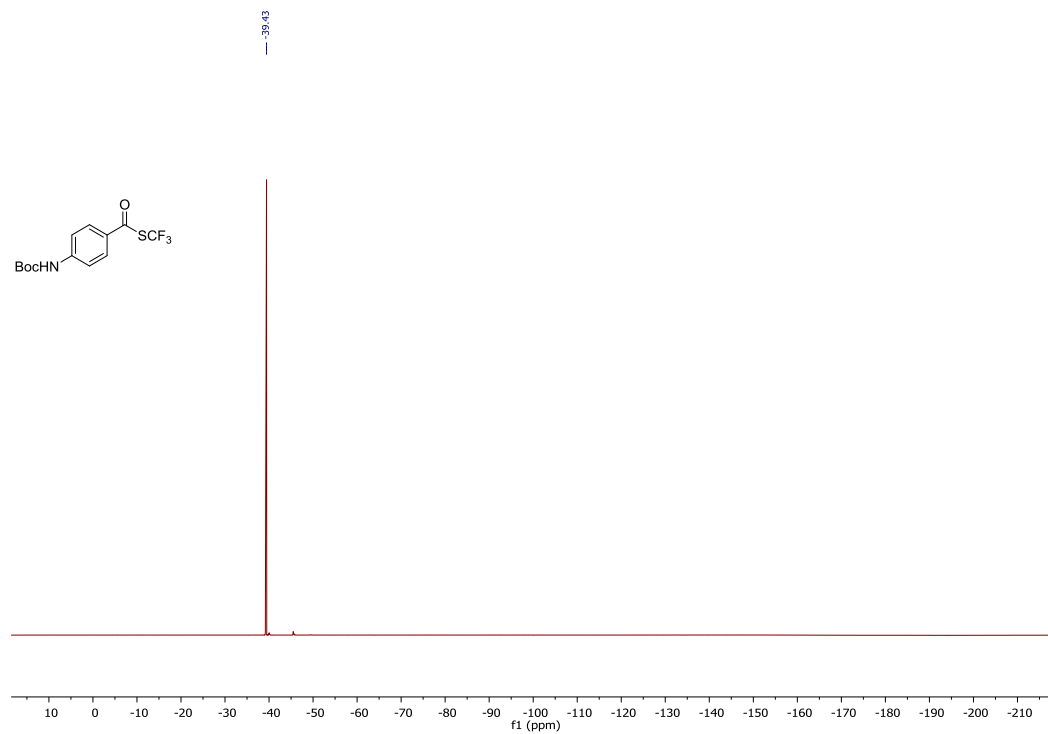

Figure S17. NMR spectra of 3q

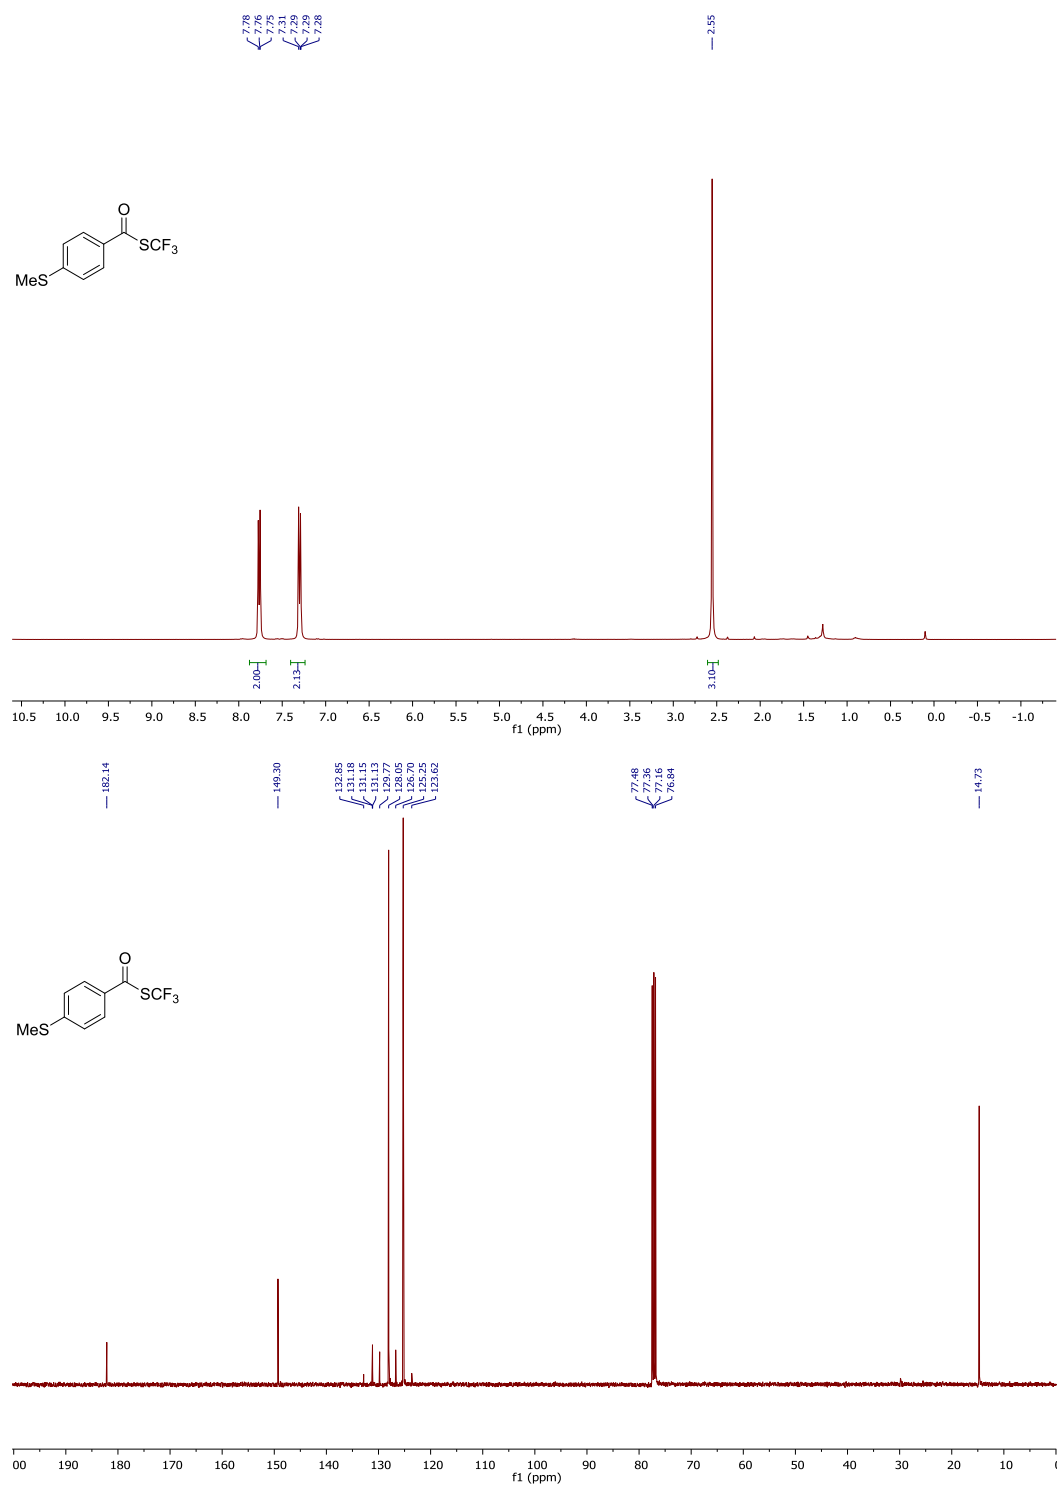

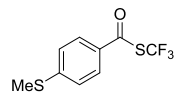

— 39.43

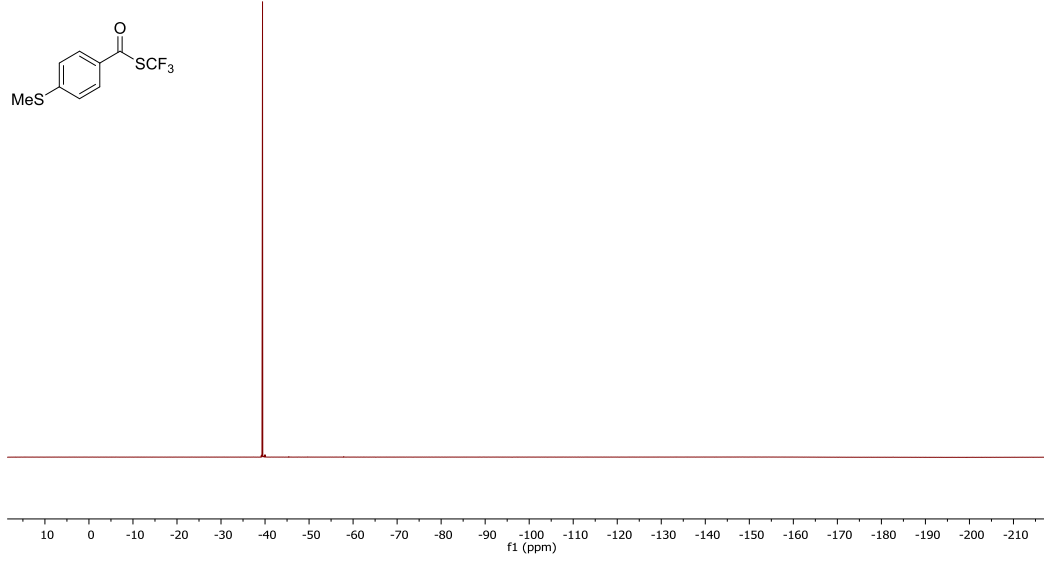

Figure S18. NMR spectra of 3r

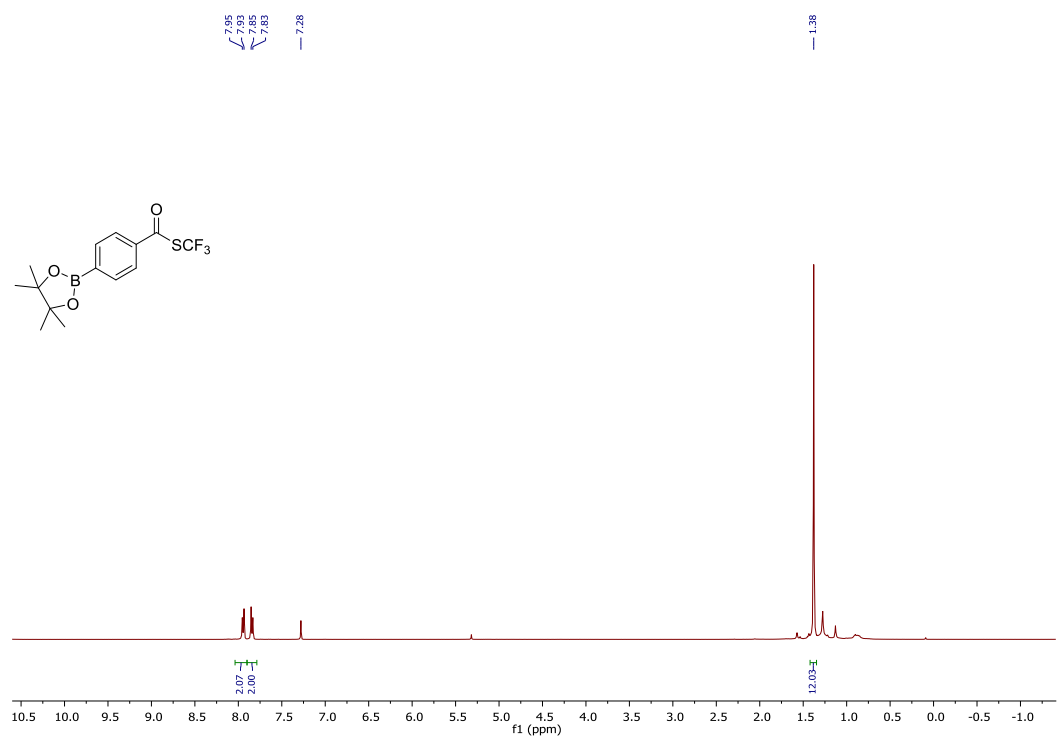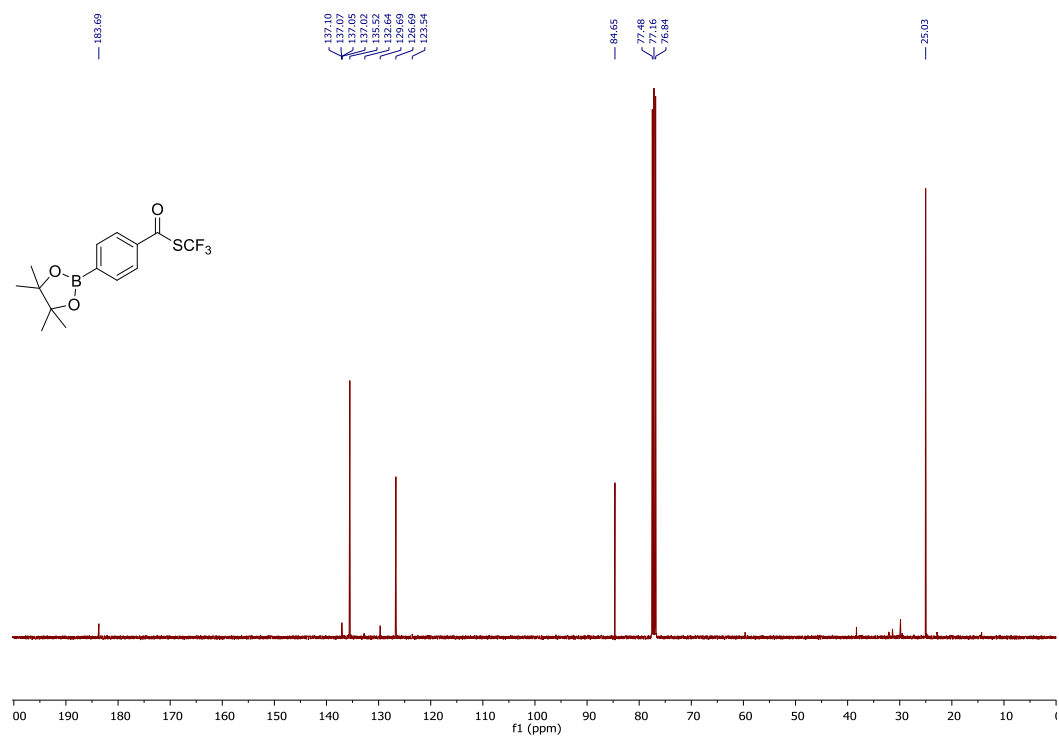

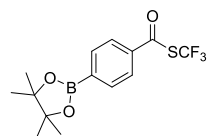

-39.68

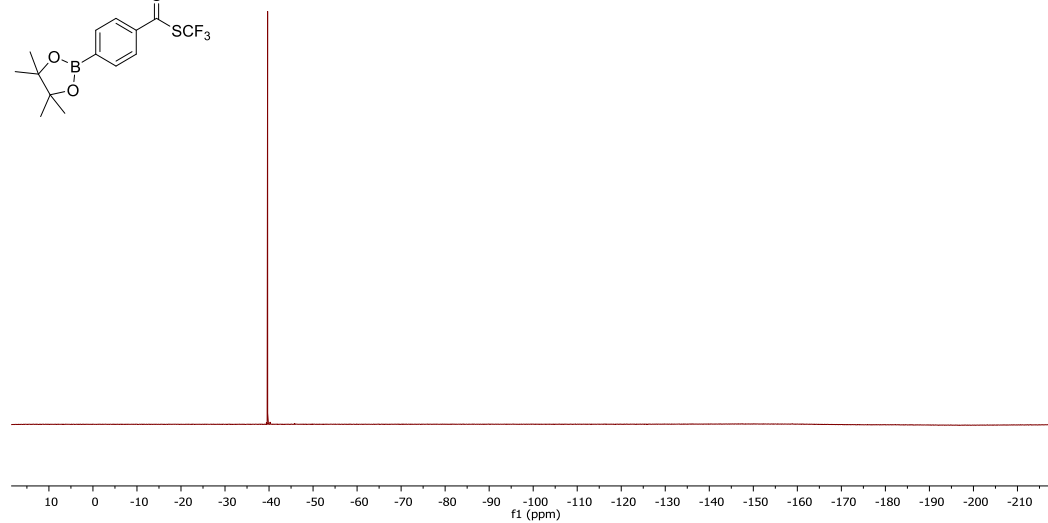



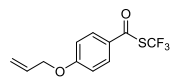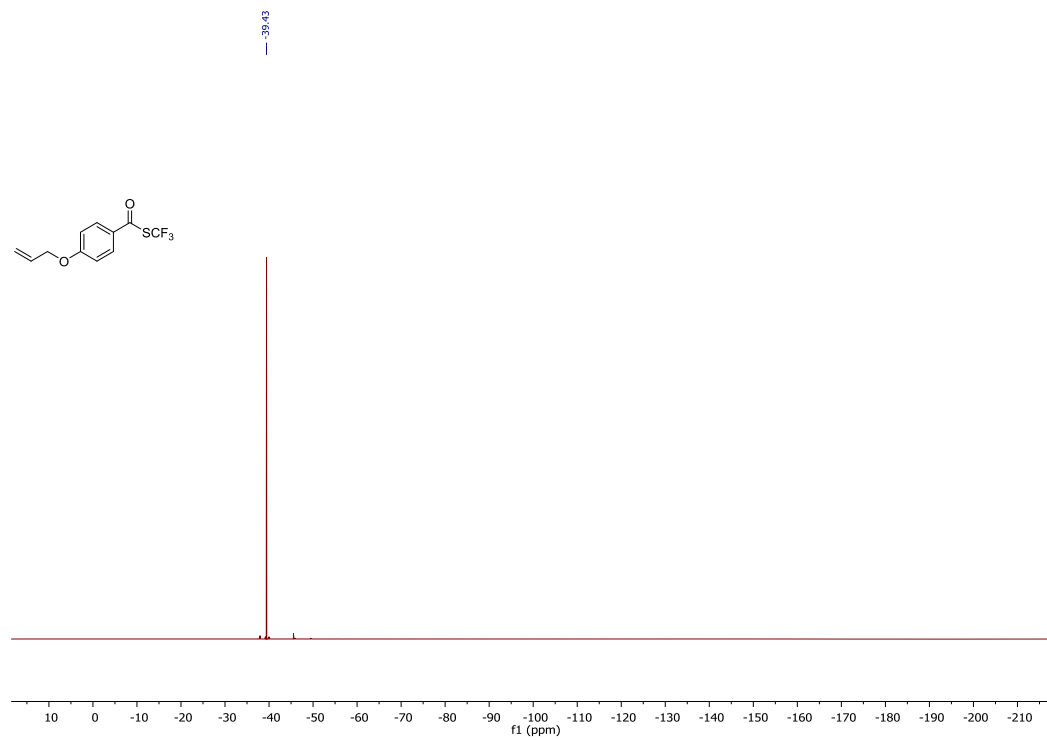



Figure S20. NMR spectra of 3t

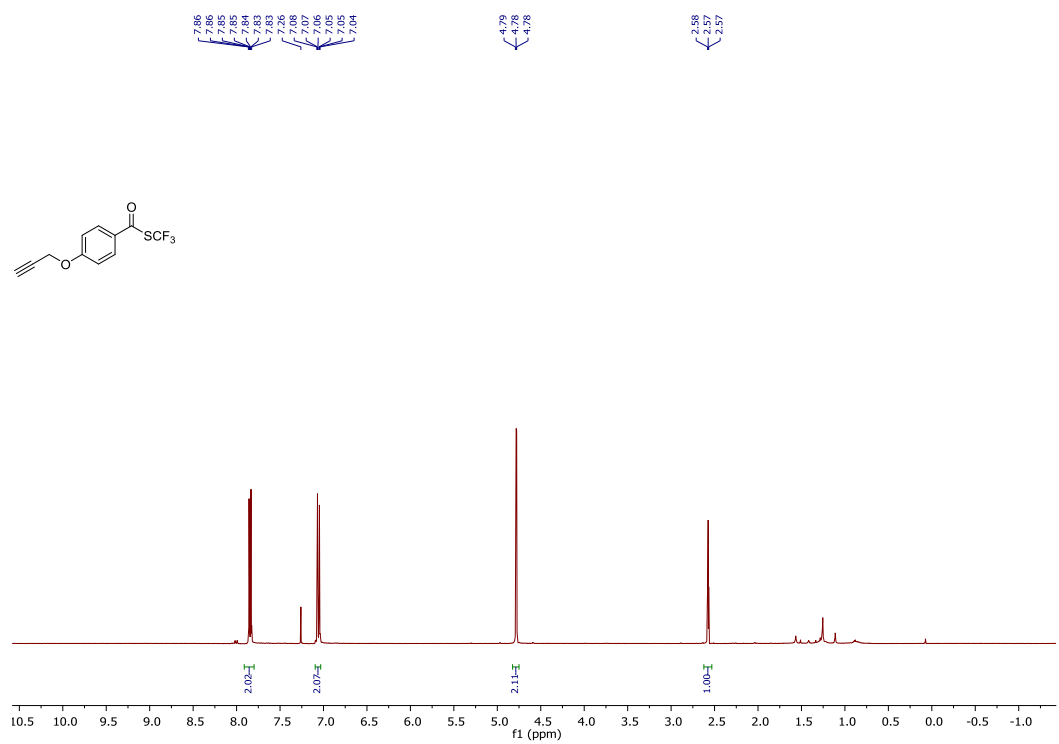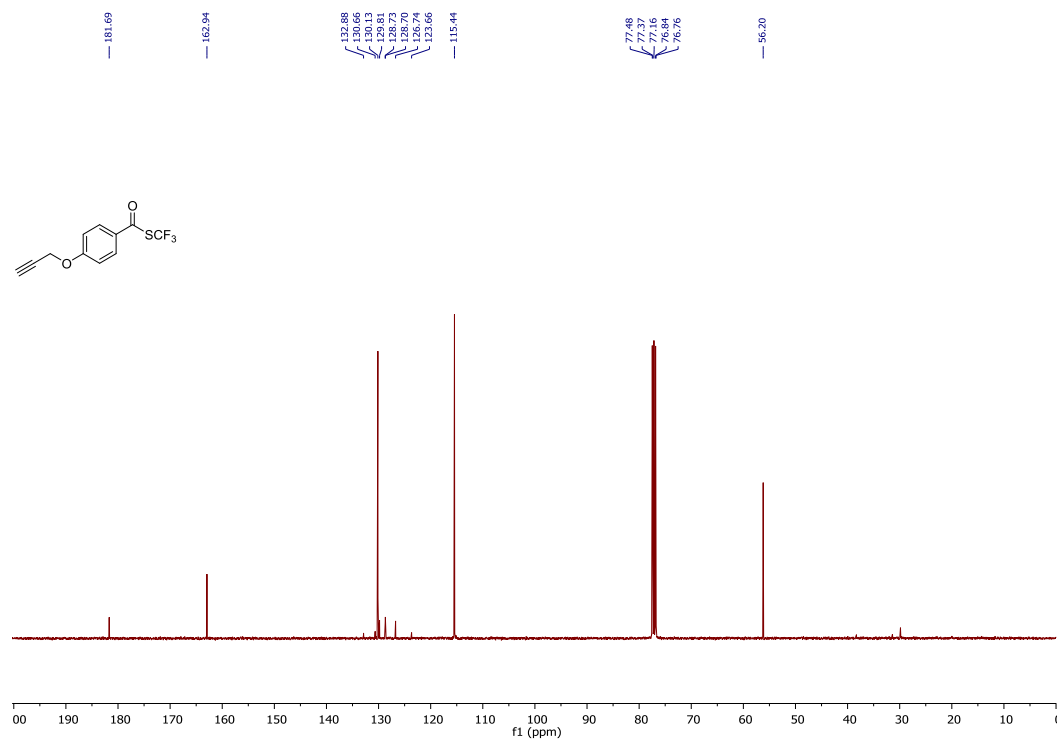

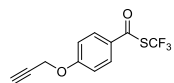

-39.14

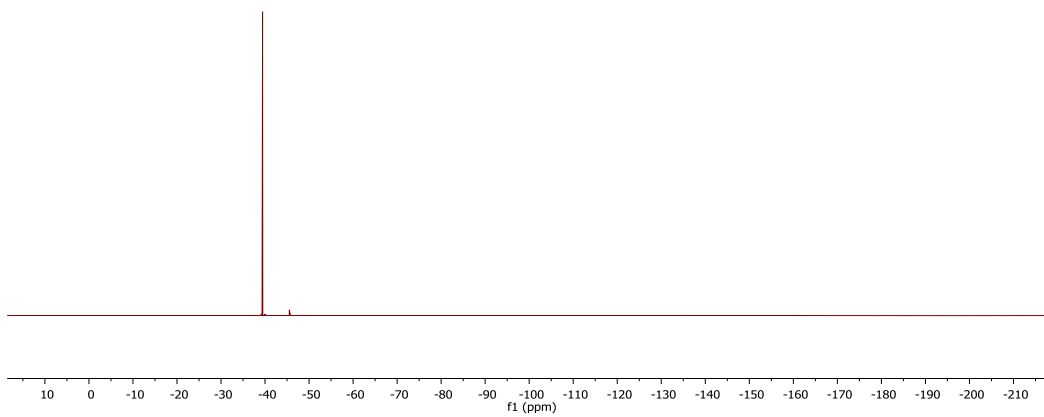

Figure S21. NMR spectra of 3u

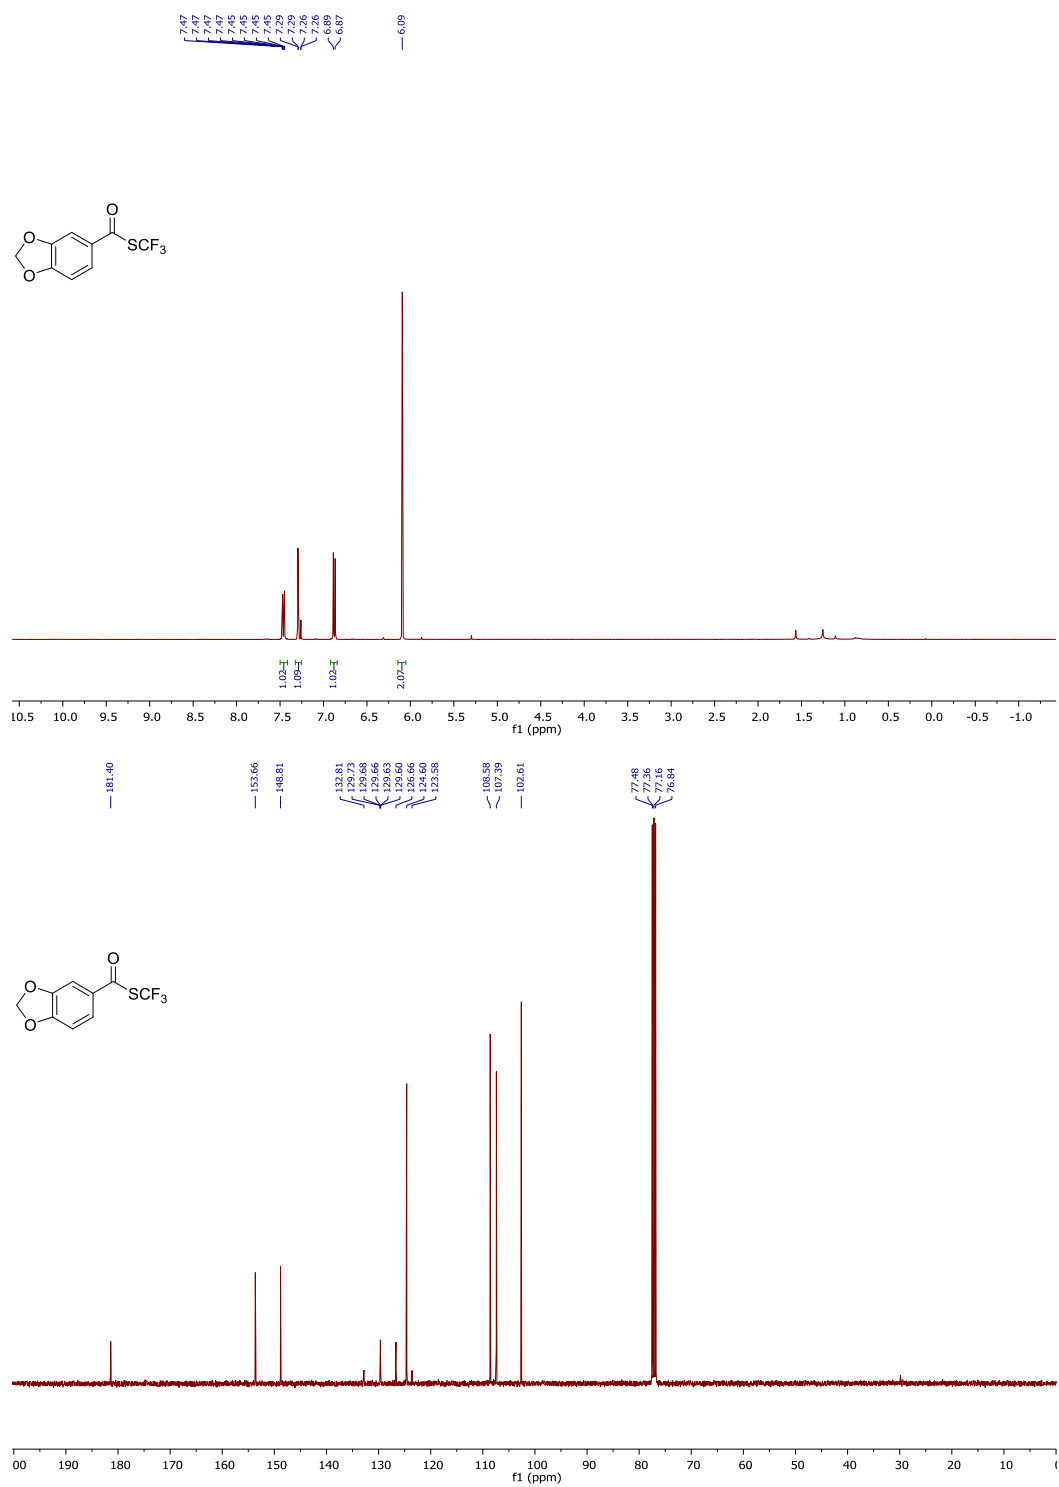

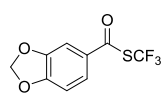

-39.58

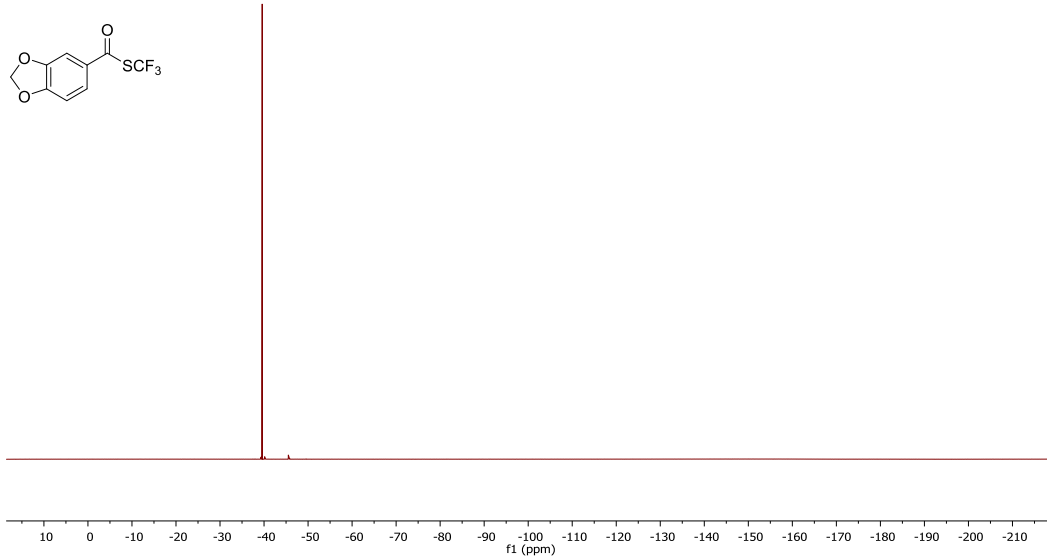

Figure S22. NMR spectra of 3v

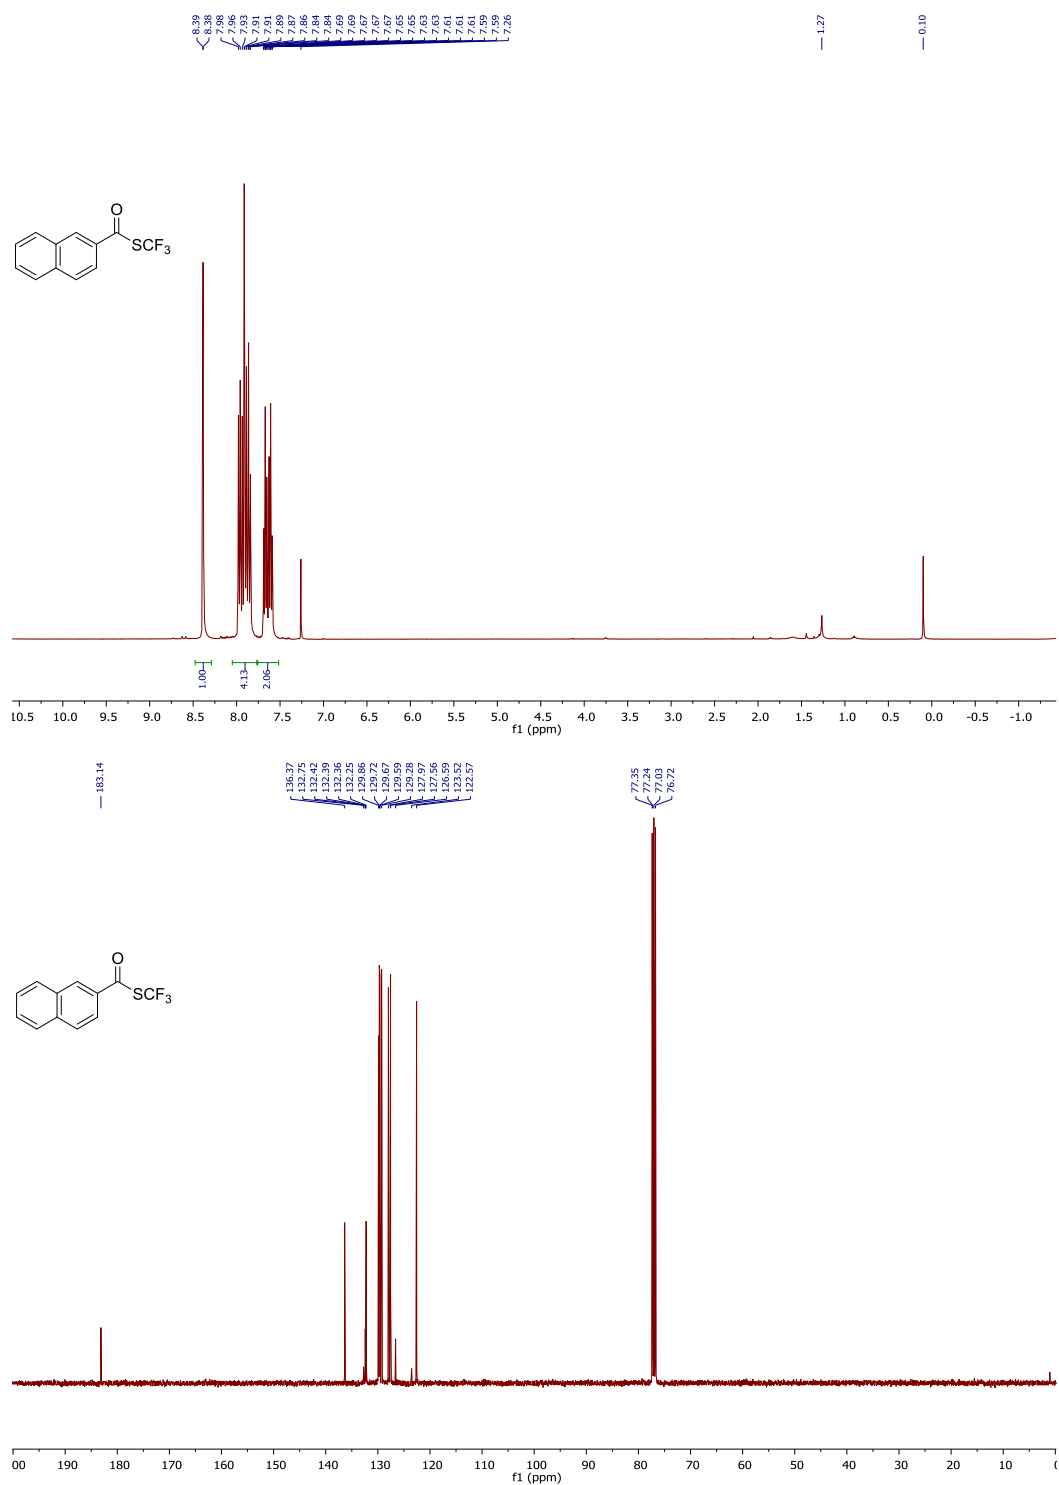

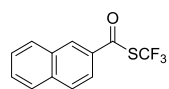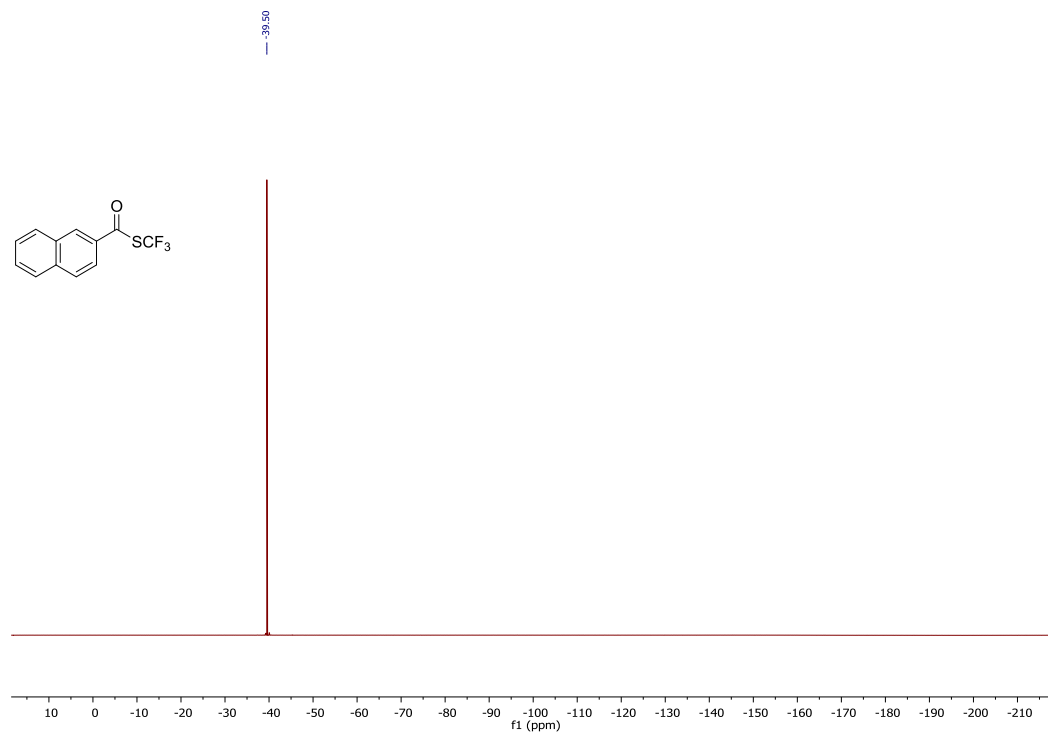

Figure S23. NMR spectra of 3w

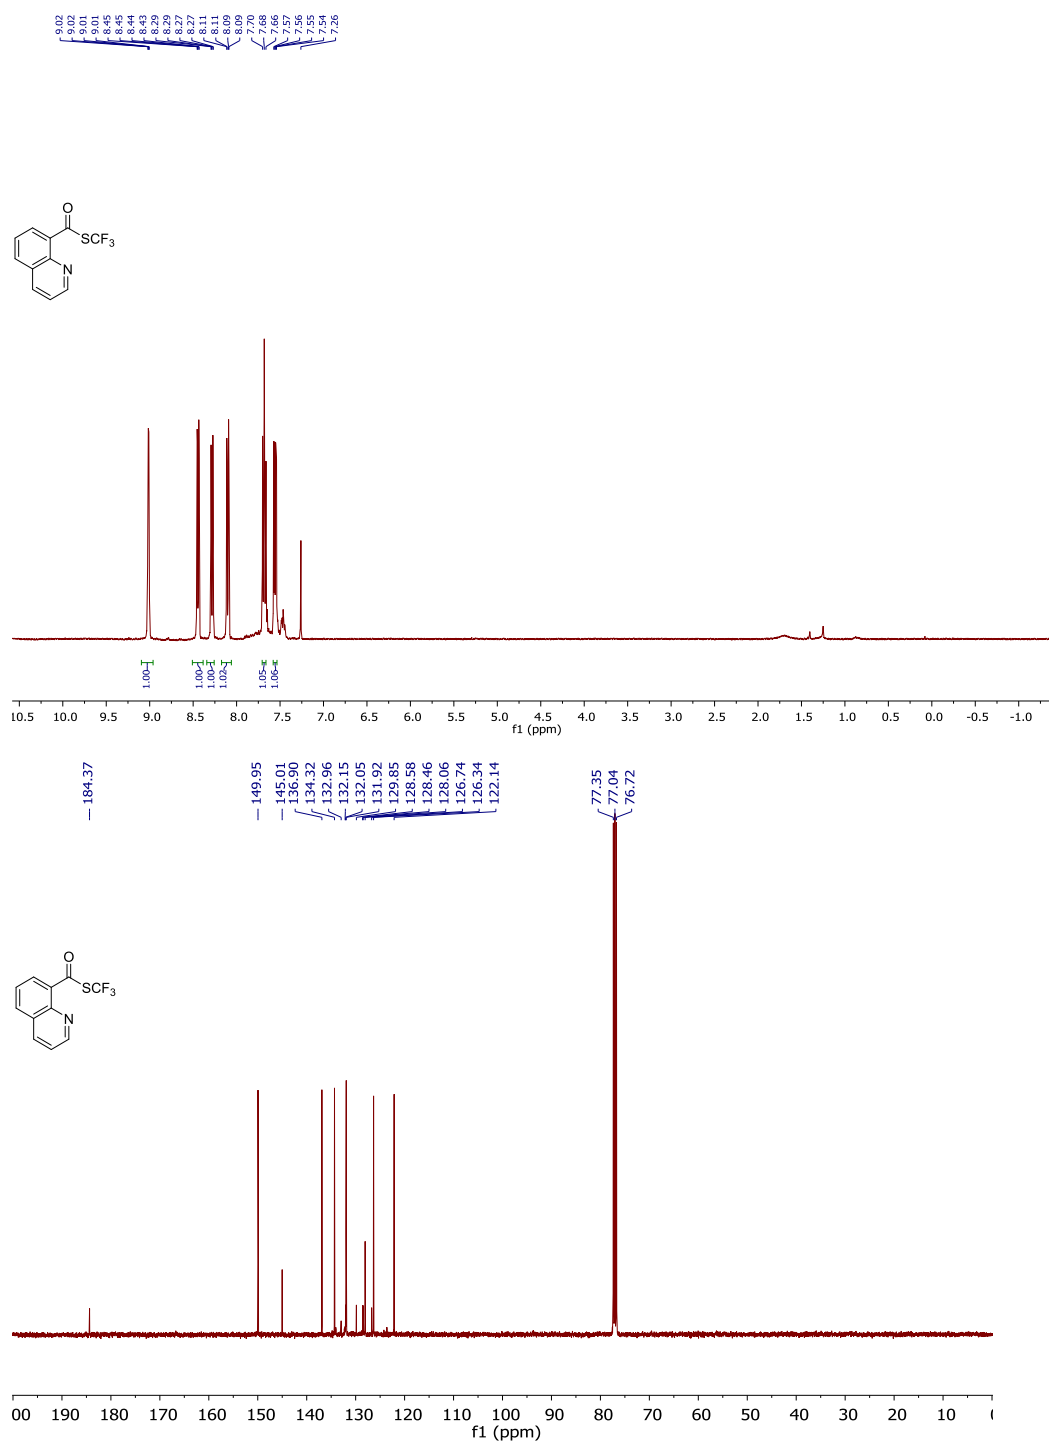

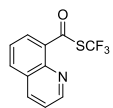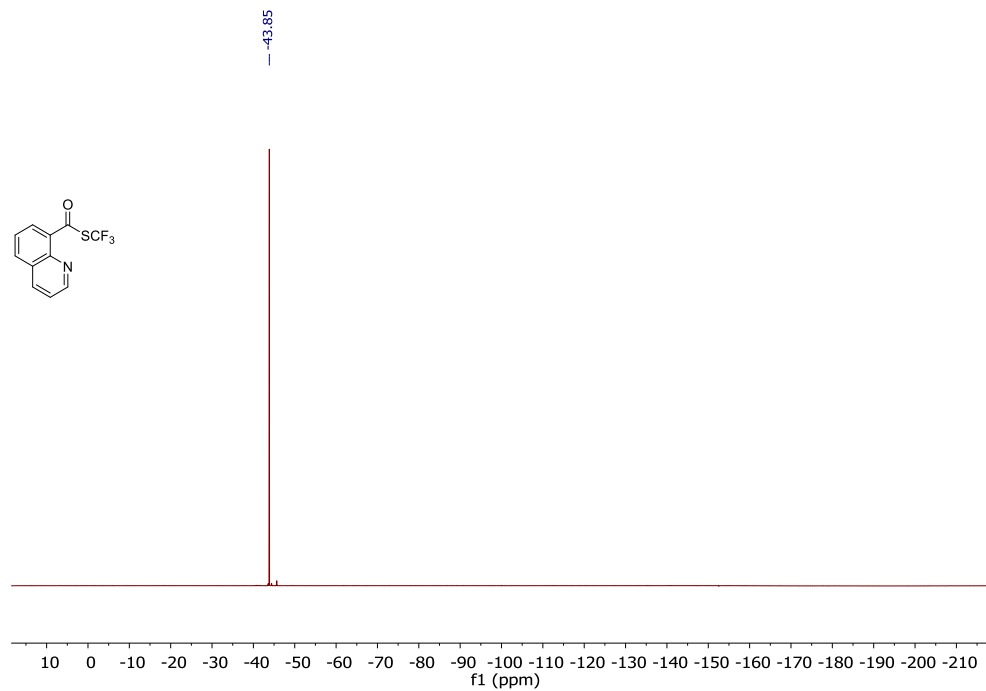



Figure S24. NMR spectra of 3x

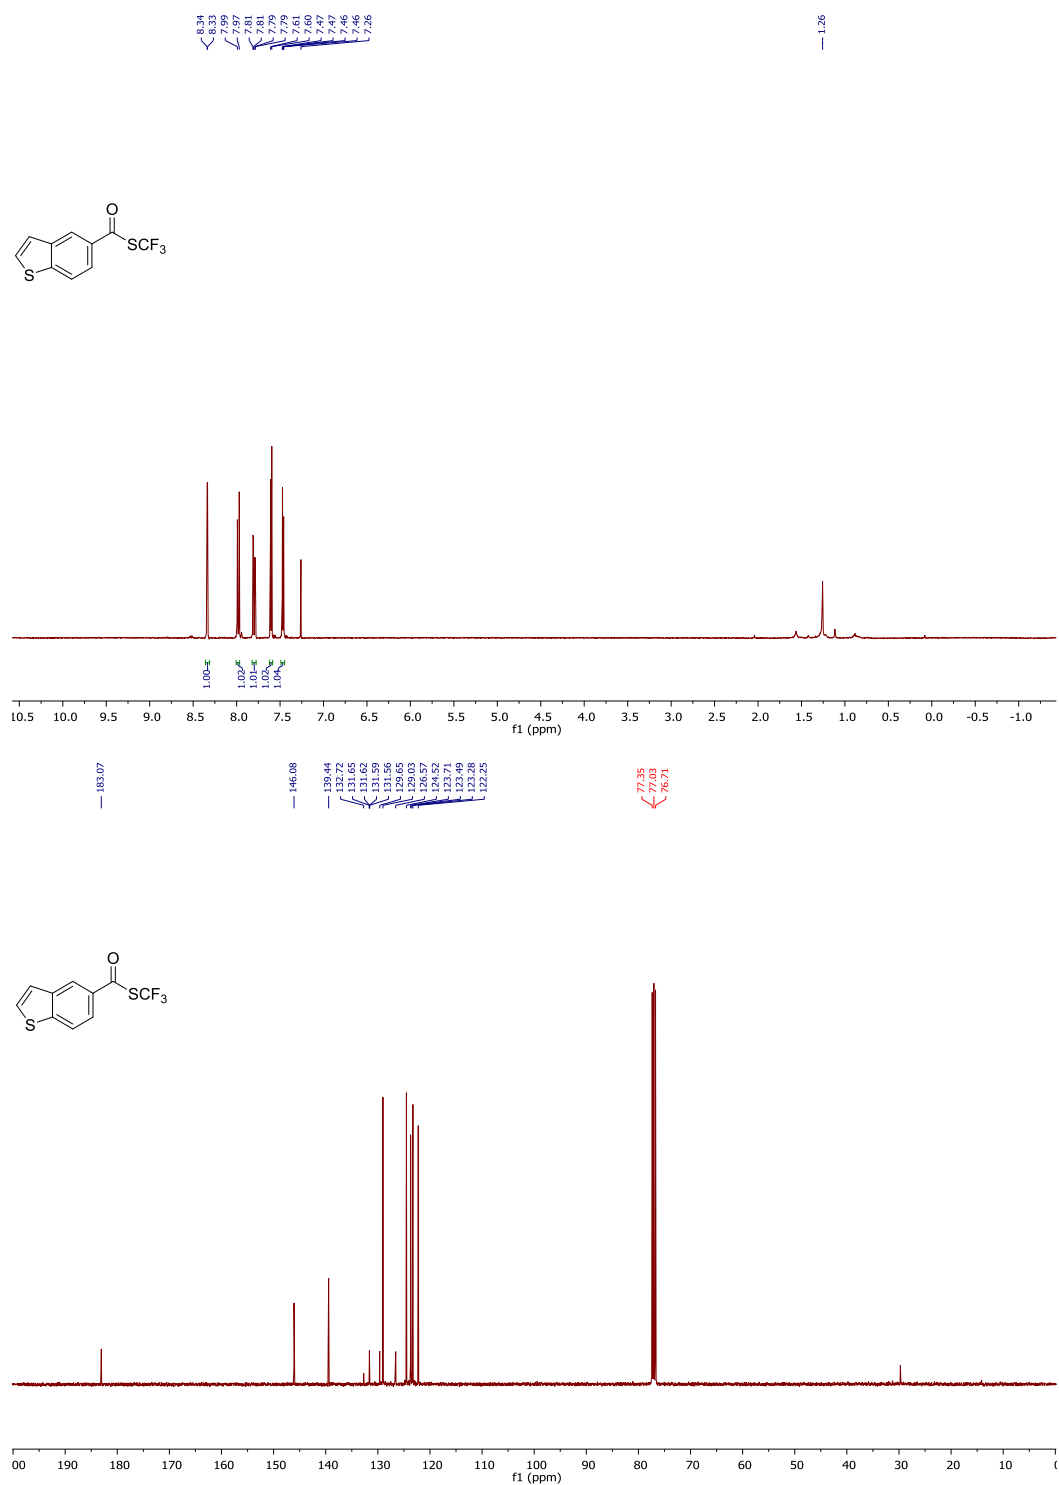

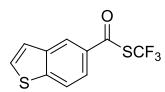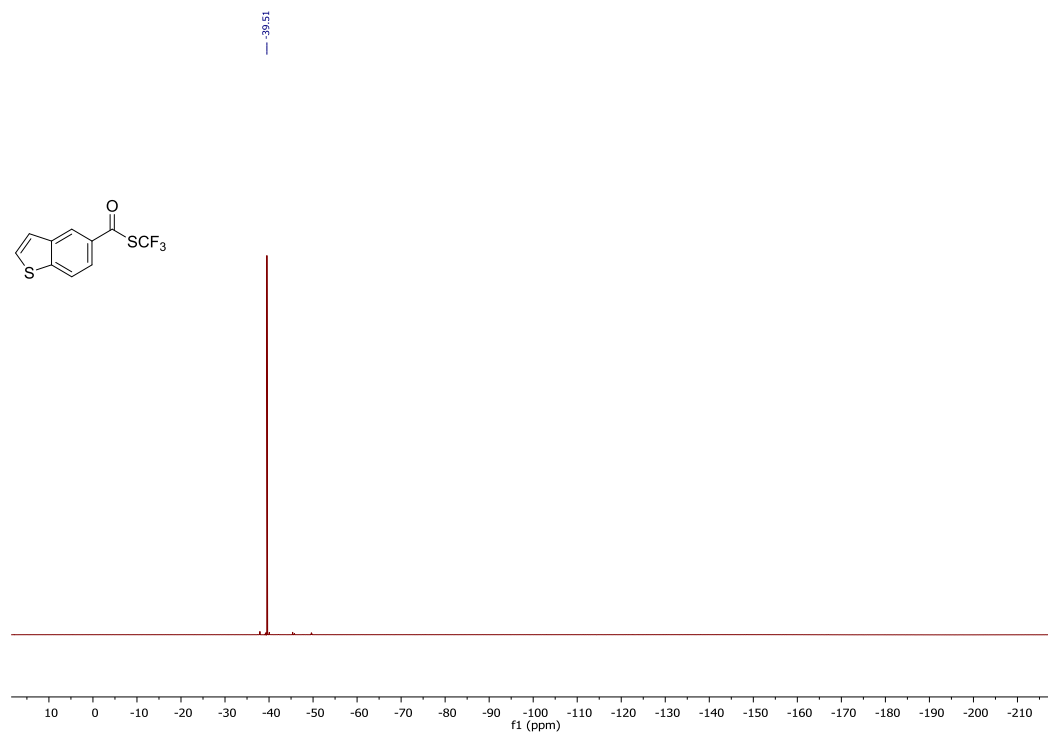

Figure S25. NMR spectra of 4a

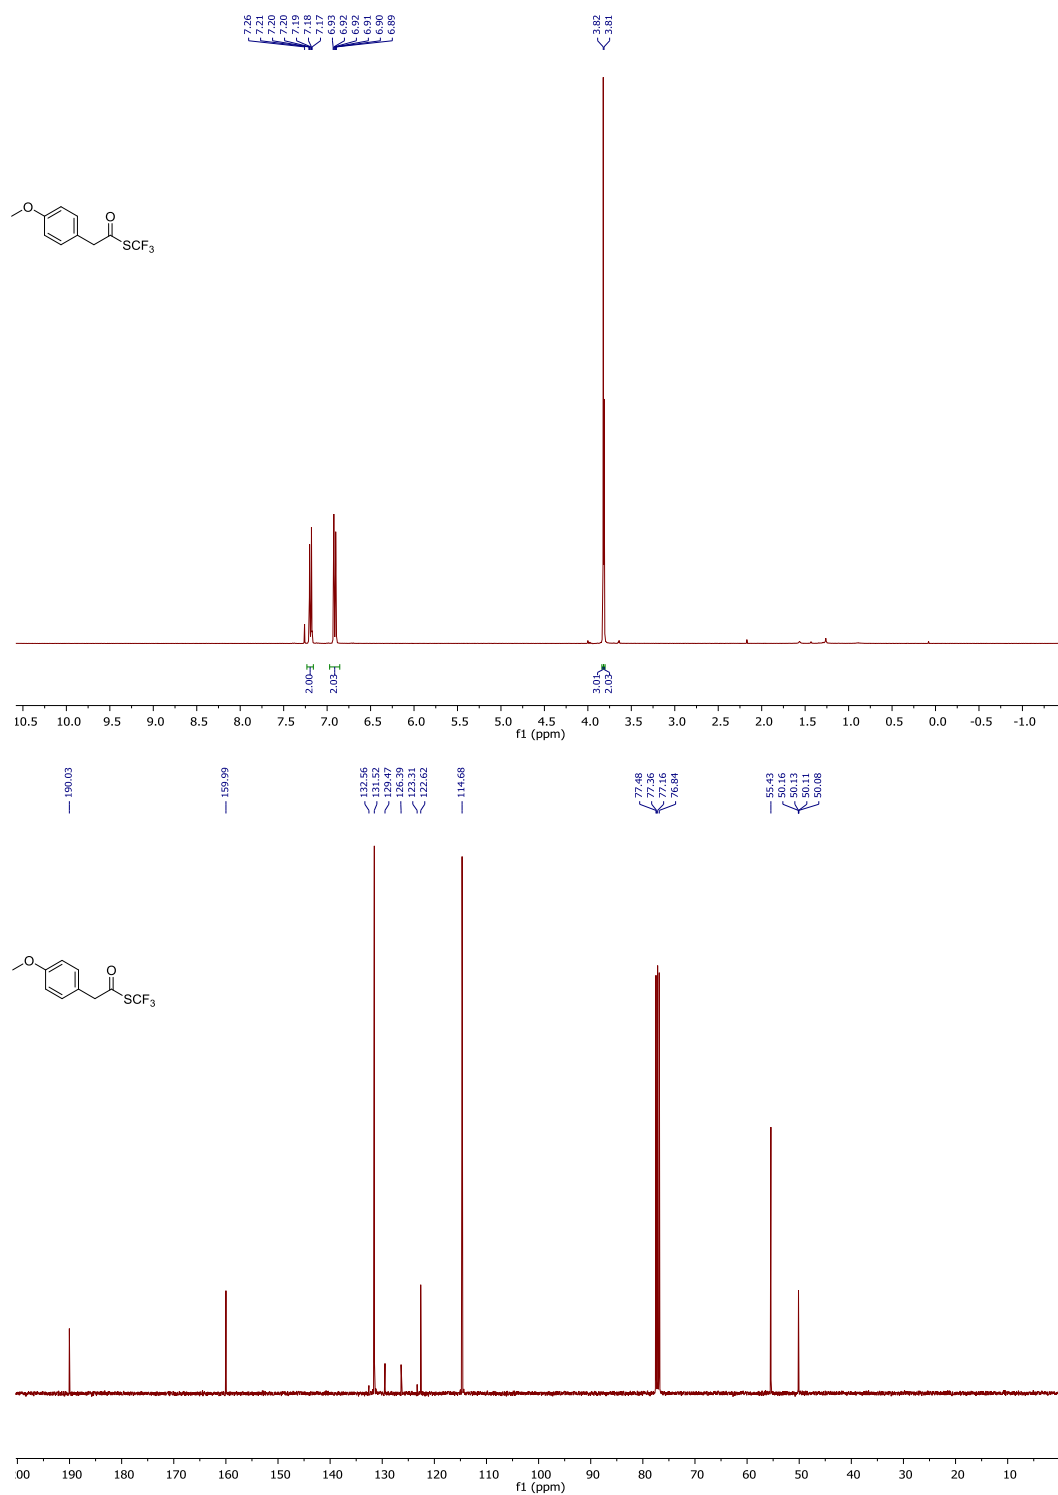

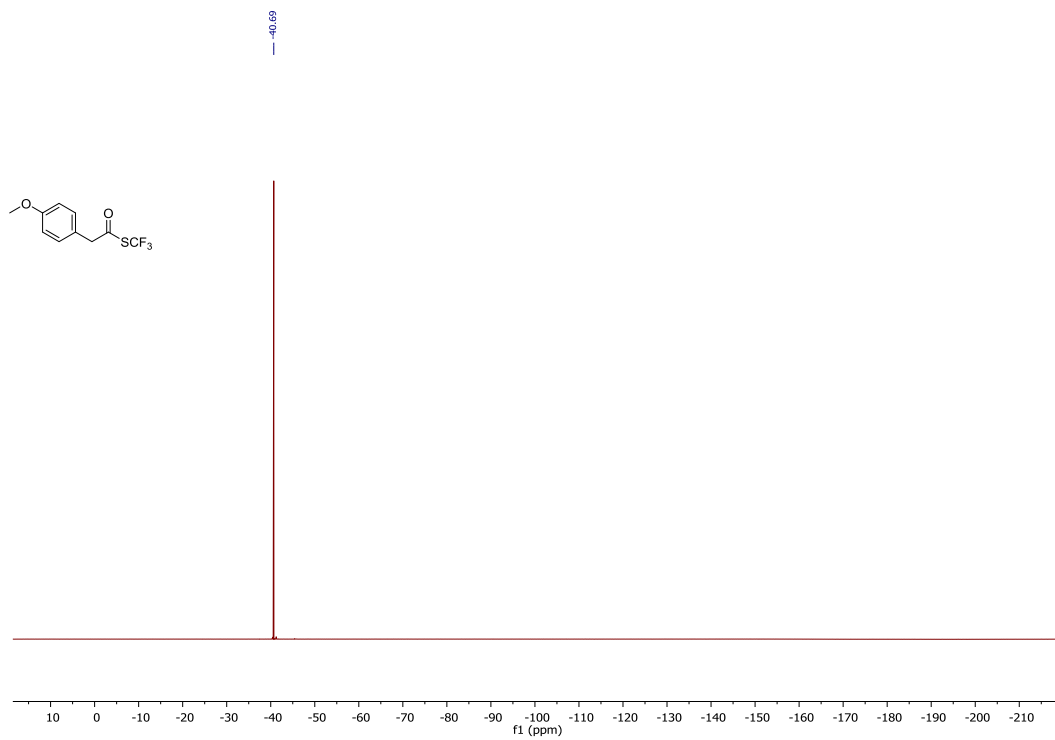

Figure S26. NMR spectra of 4b

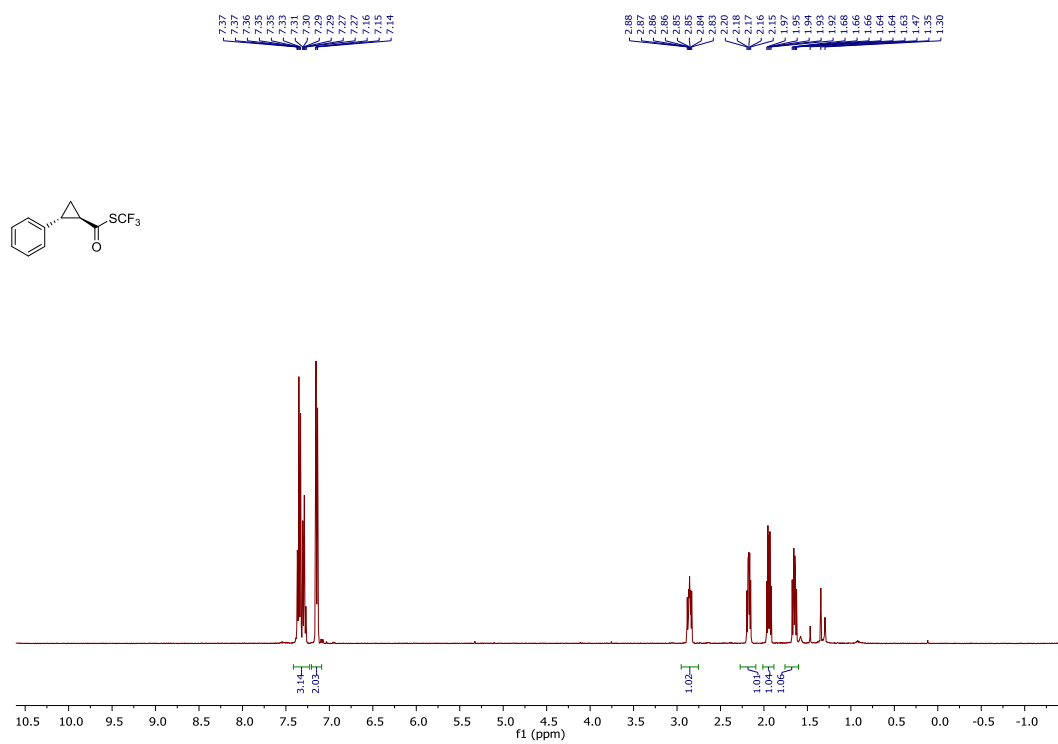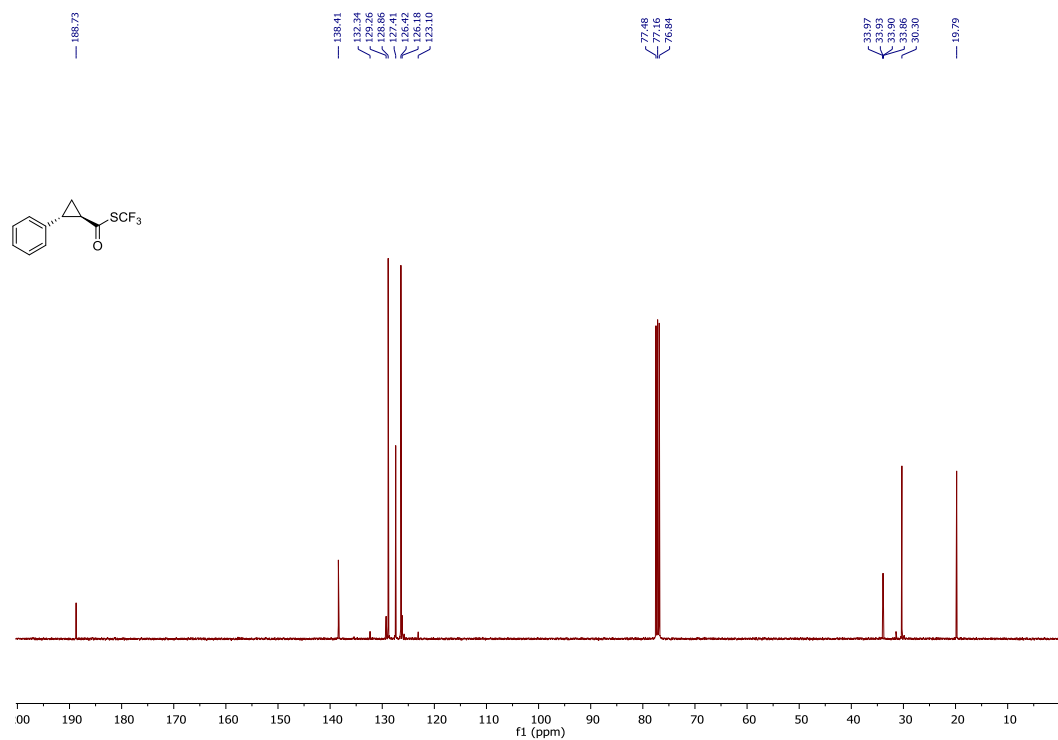

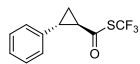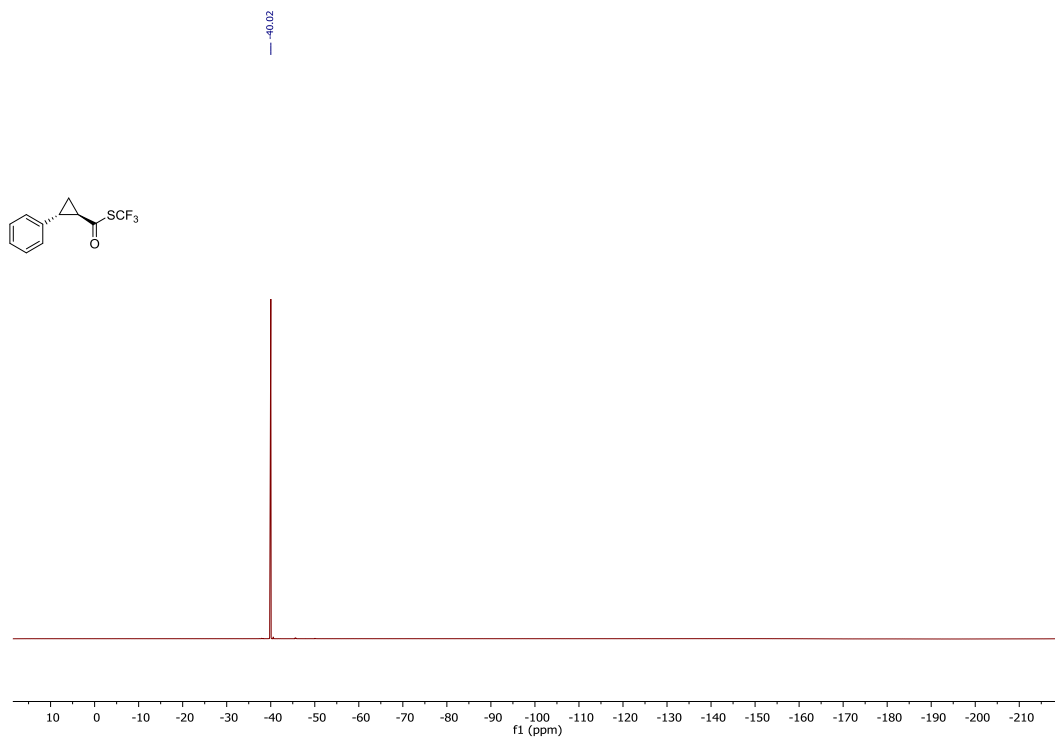

Figure S27. NMR spectra of 4c

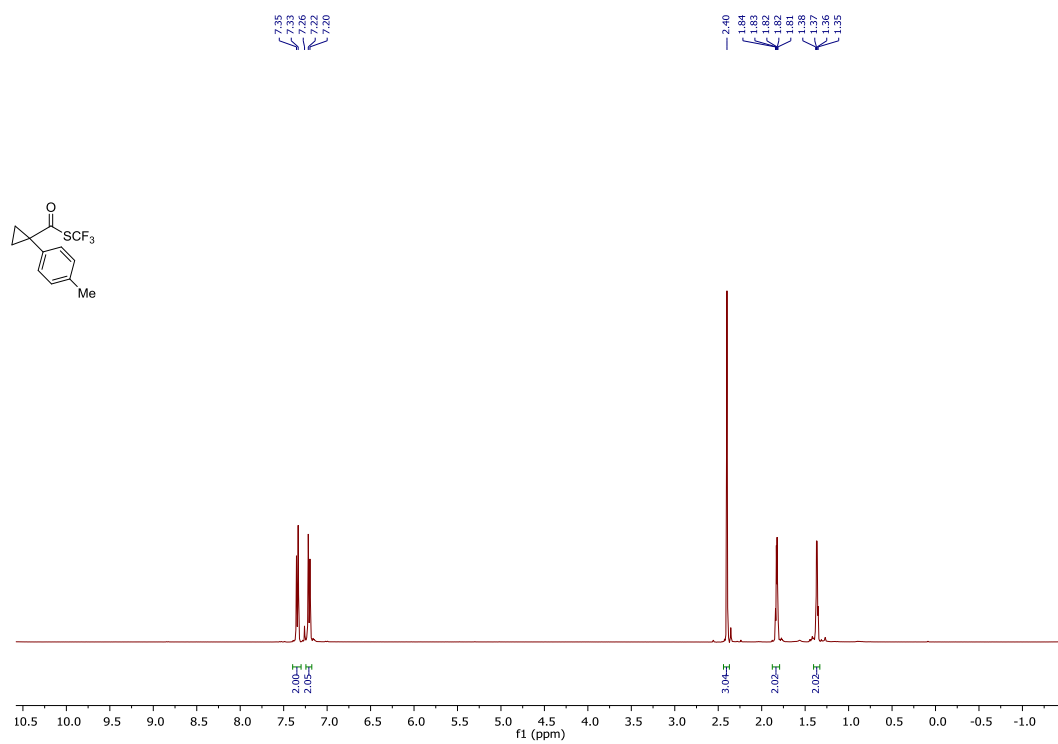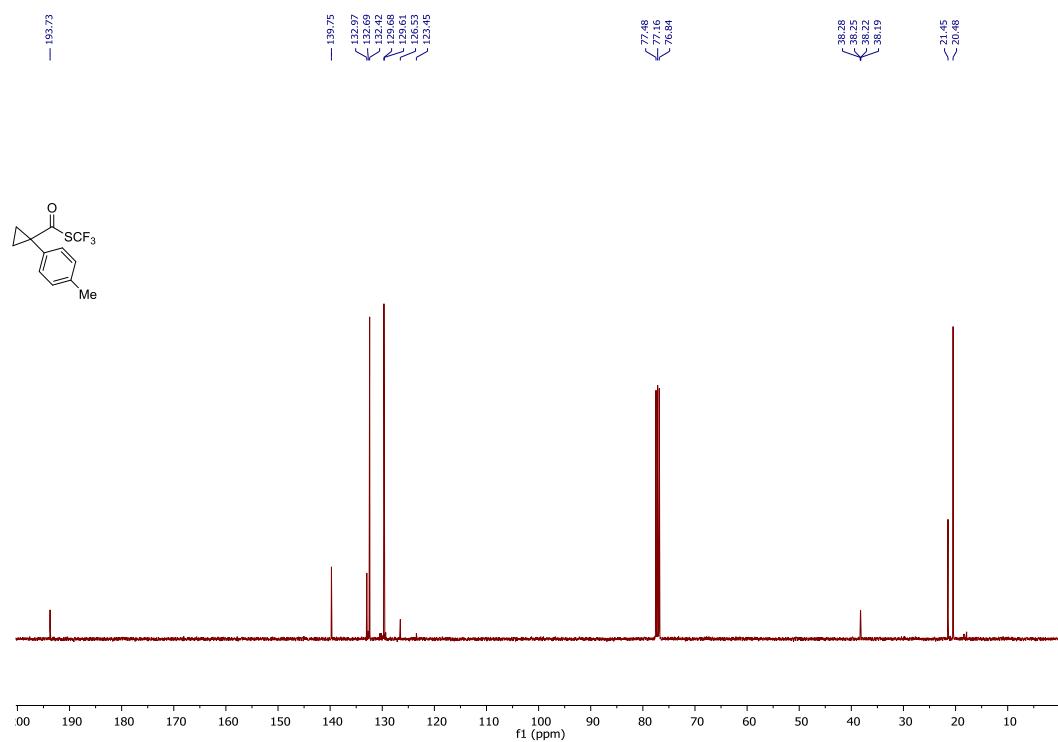

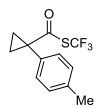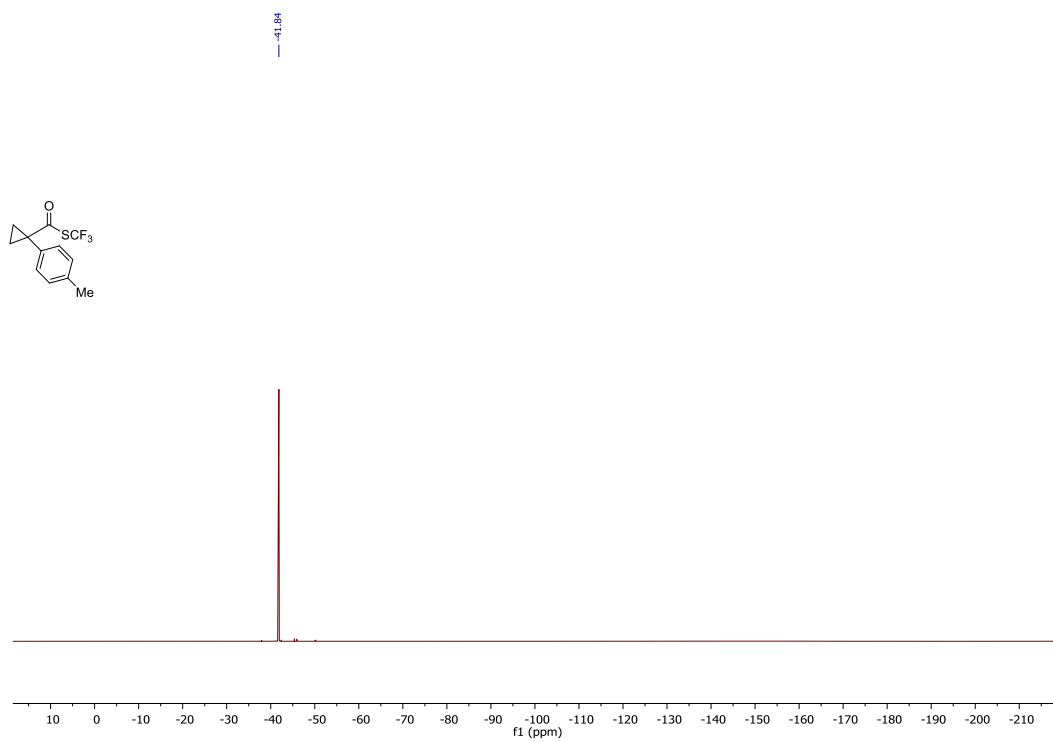



Figure S28. NMR spectra of 4d

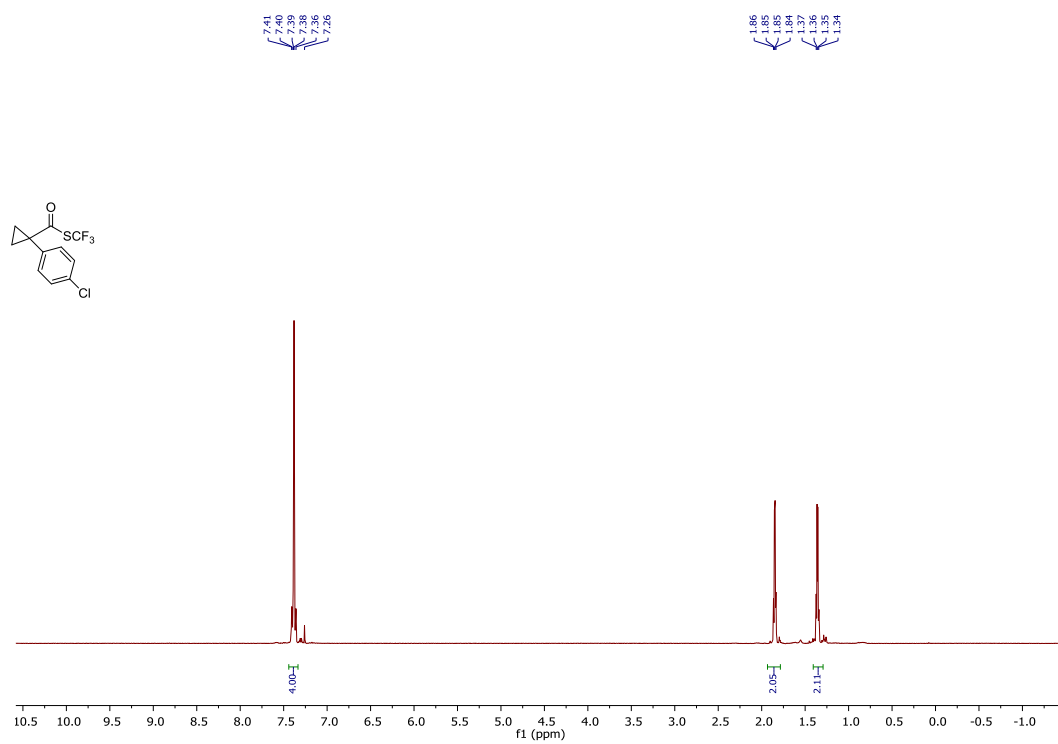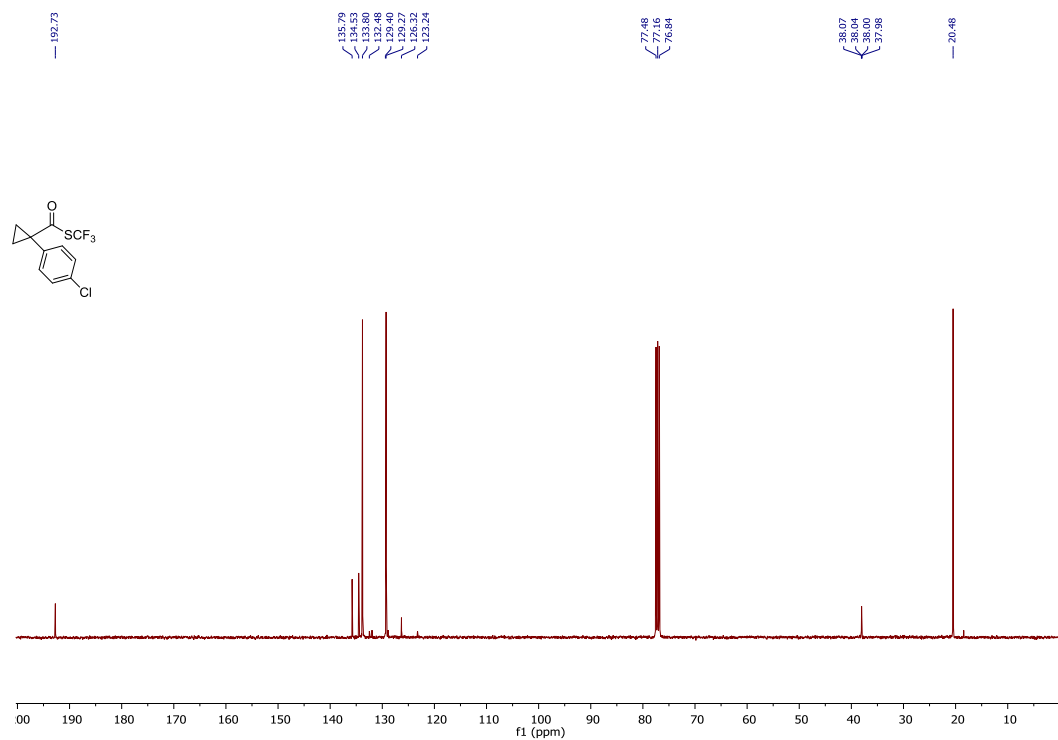

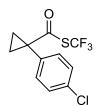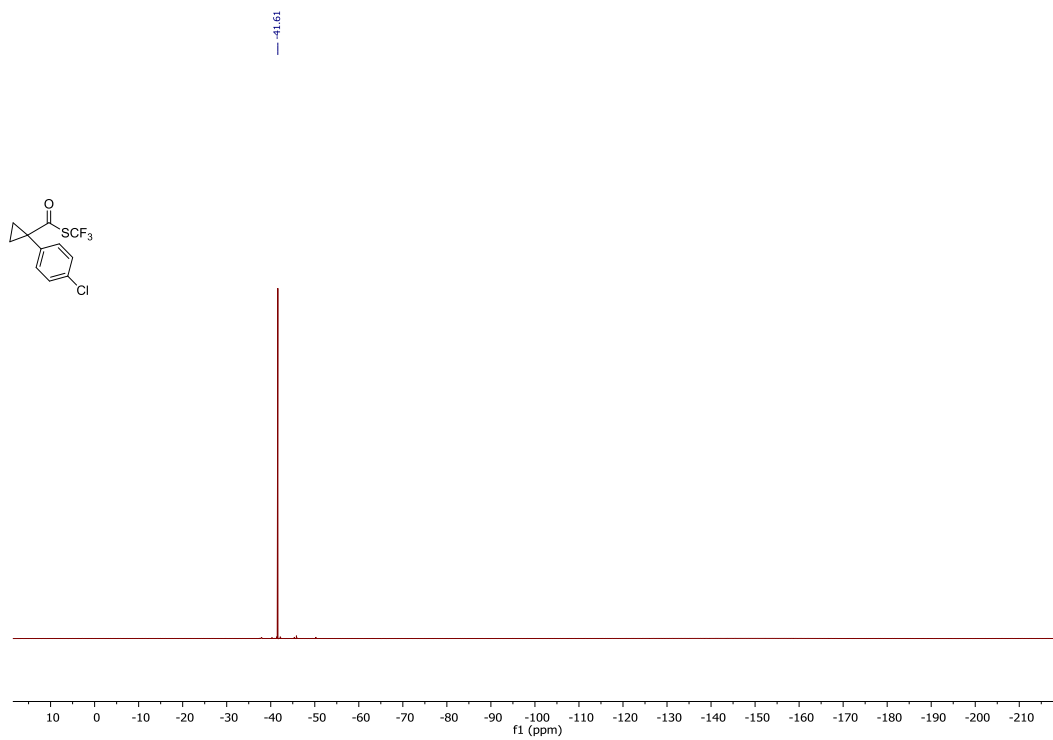

Figure S29. NMR spectra of 4e

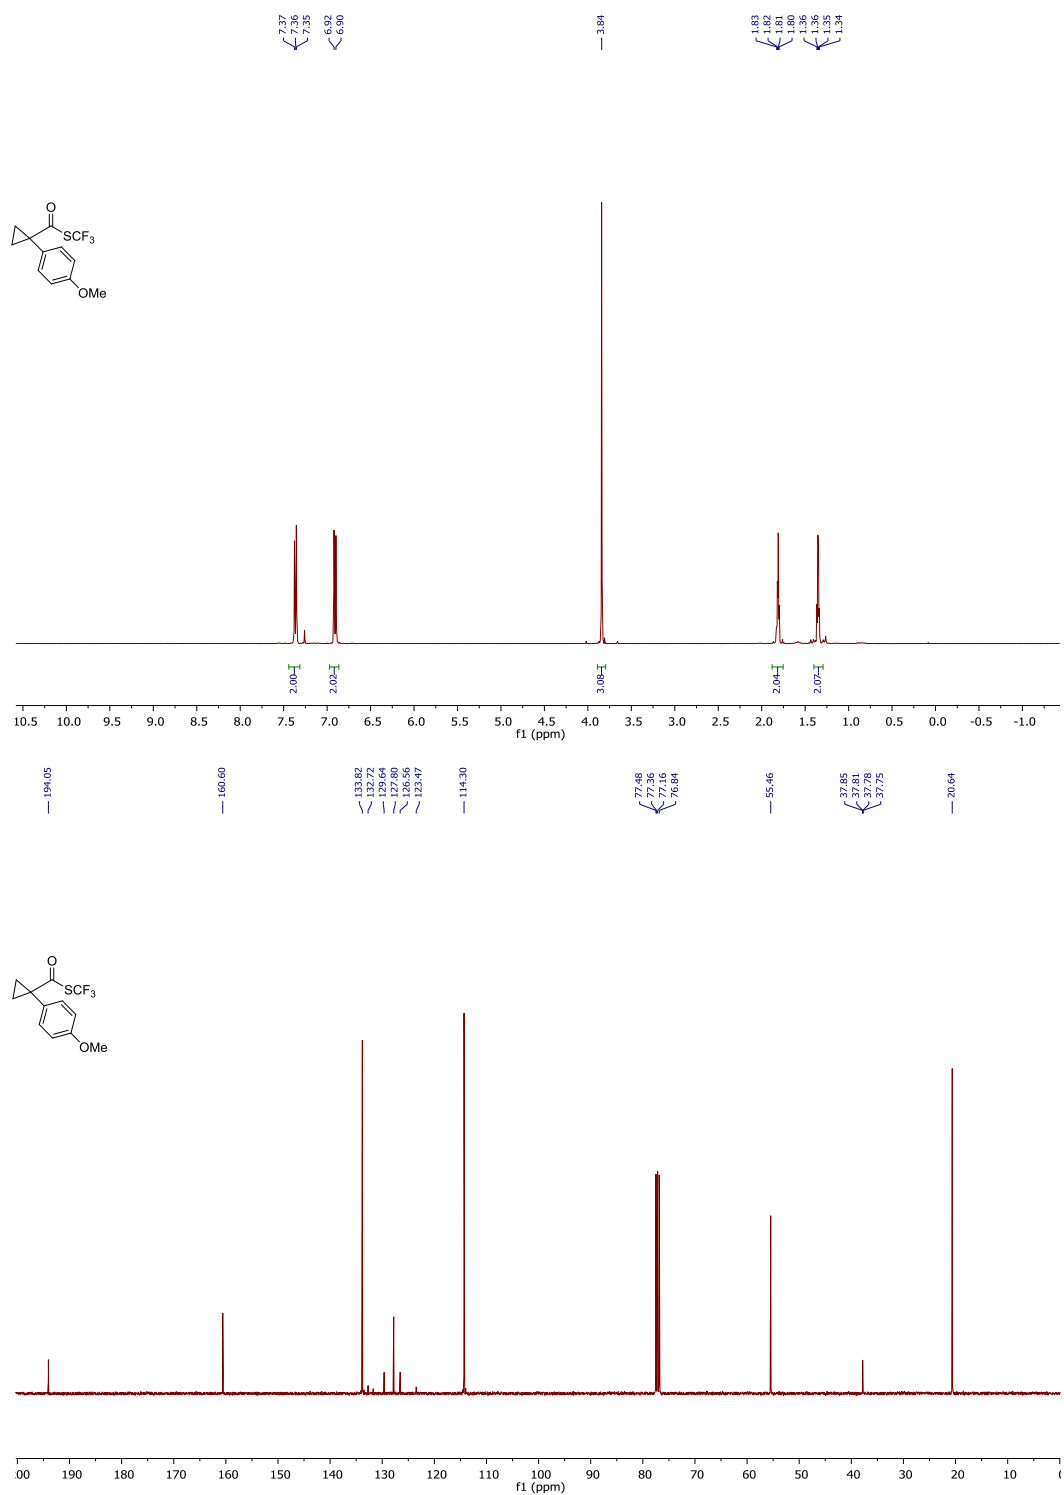

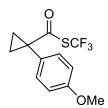

—41.95

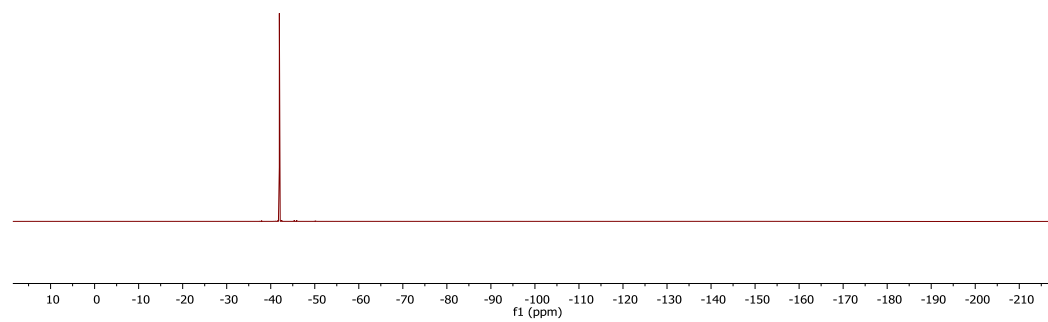

Figure S30. NMR spectra of 5a

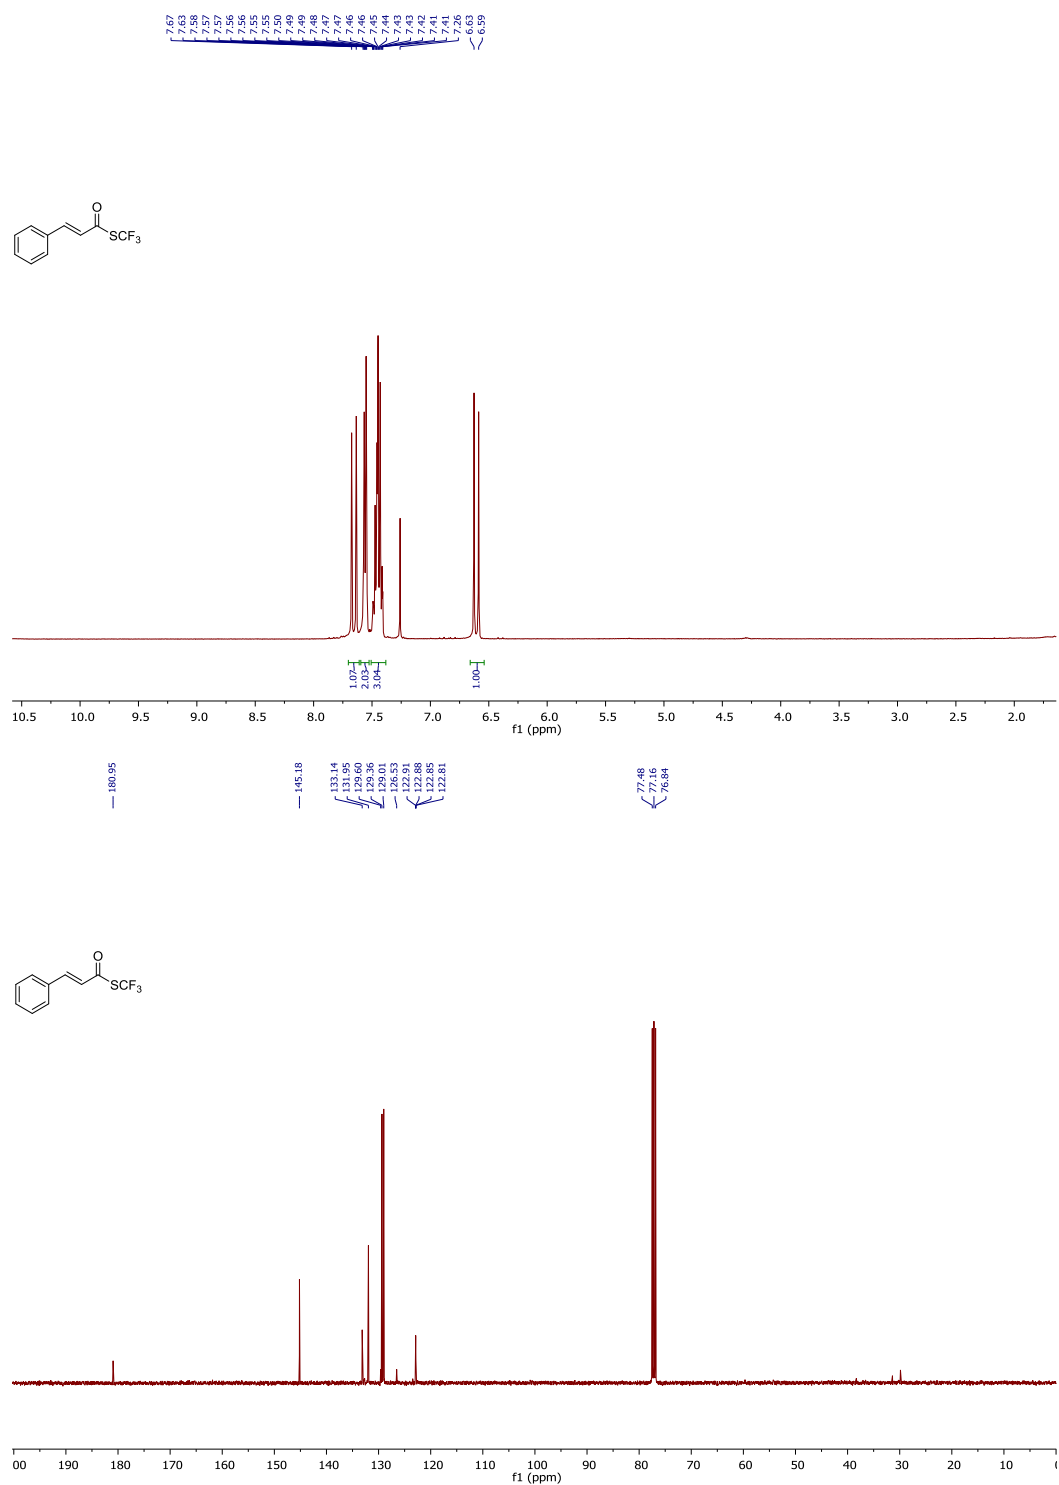

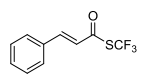

-39.52

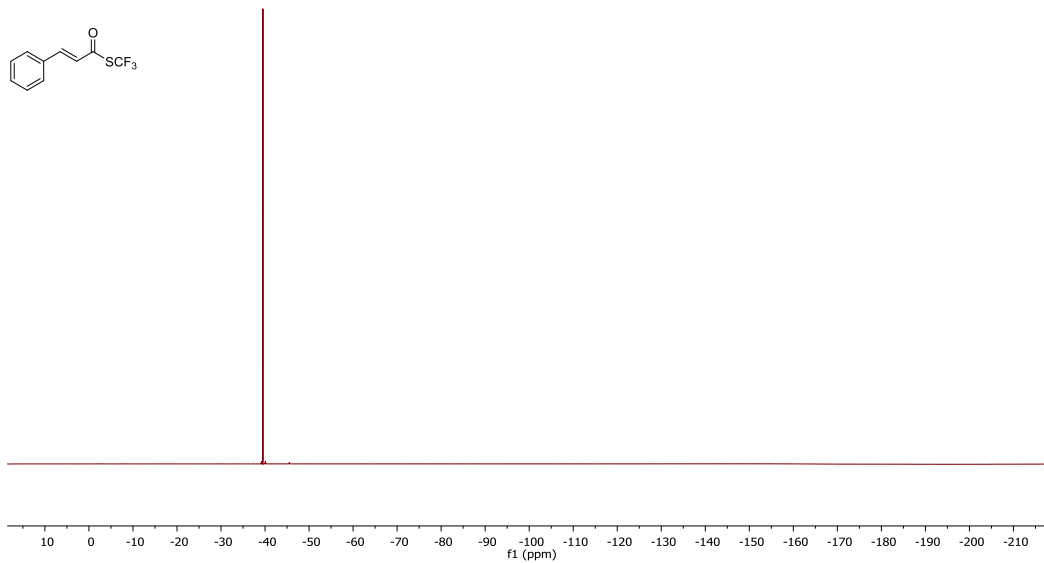

Figure S31. NMR spectra of 5b

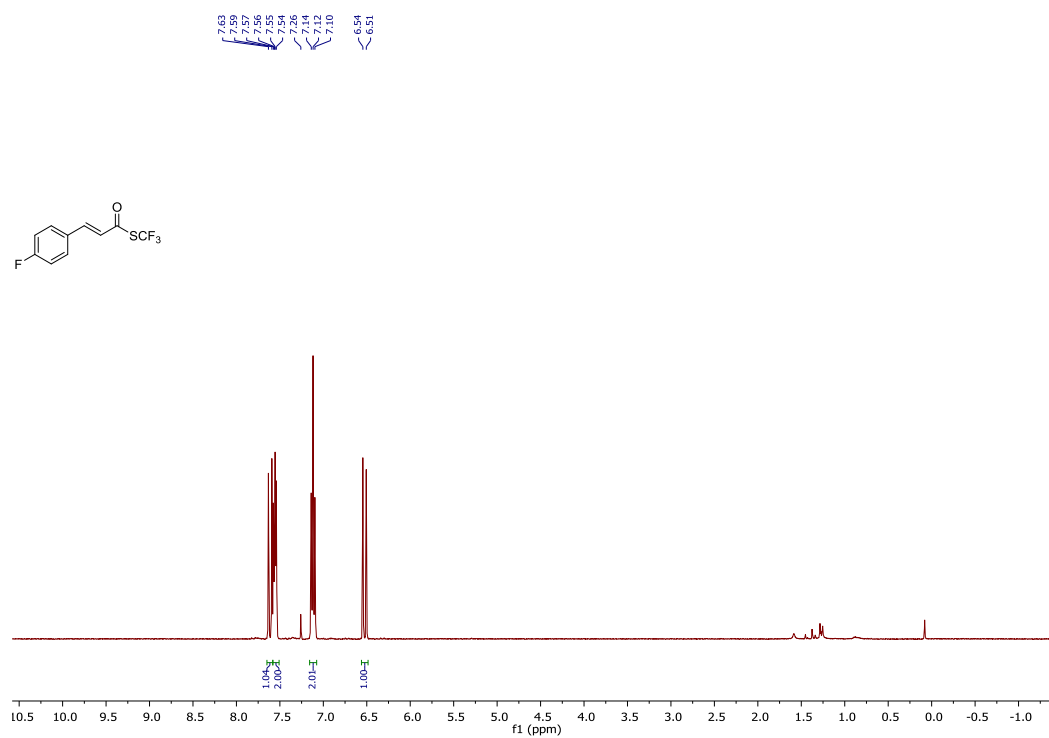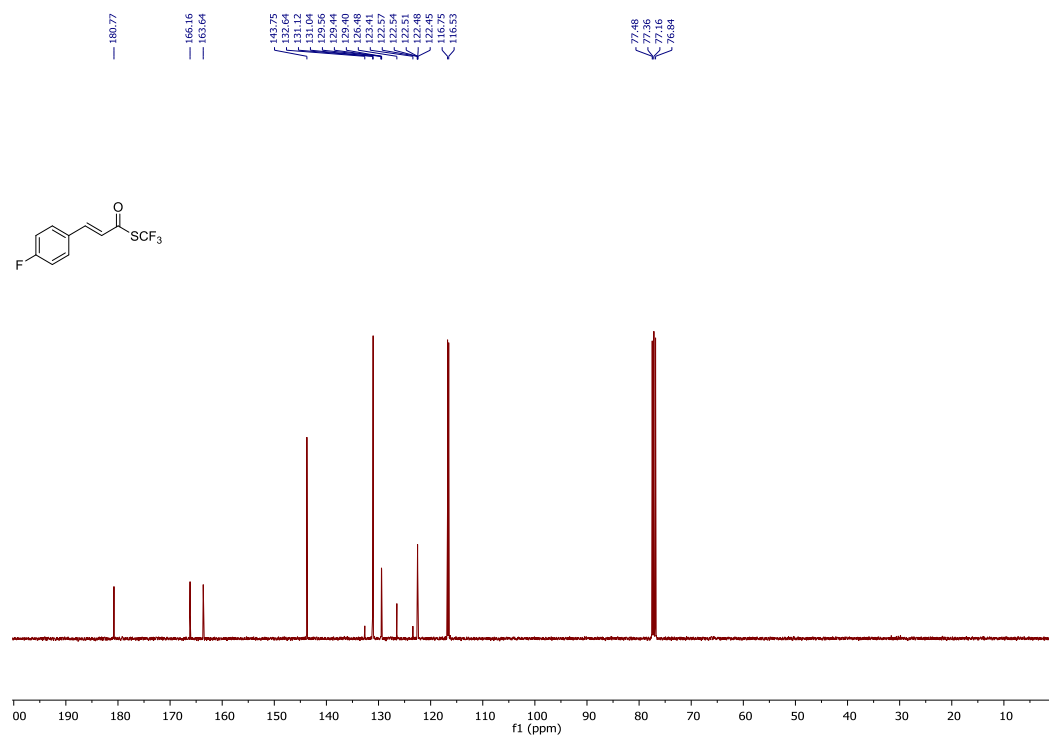

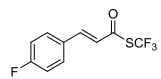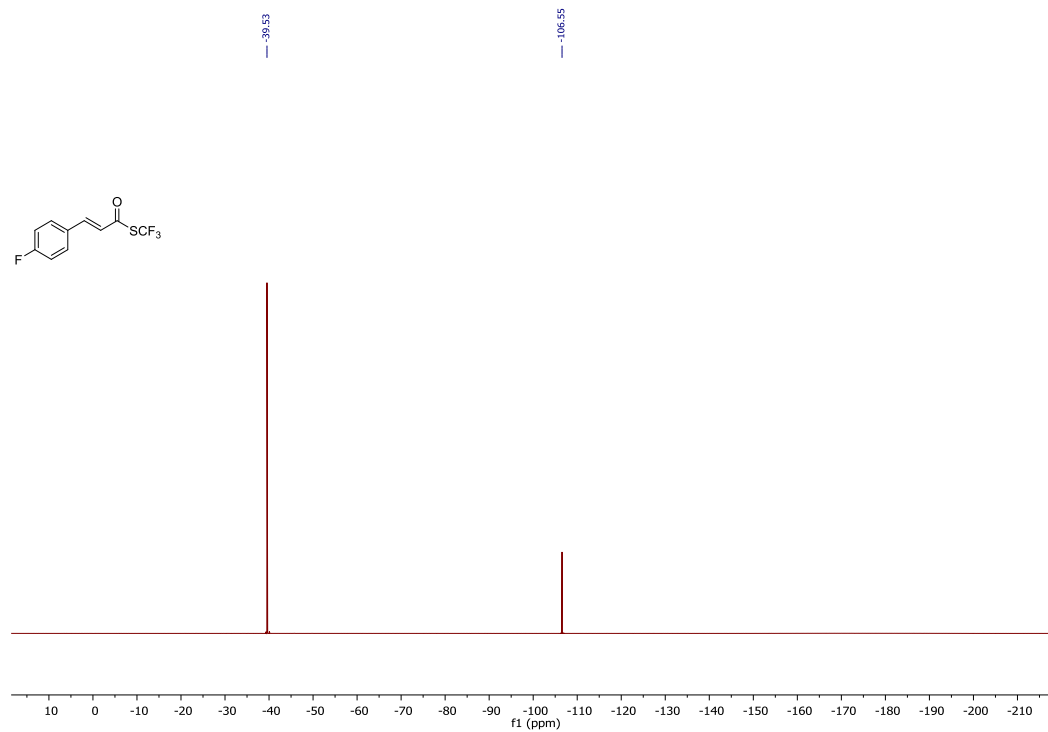



Figure S32. NMR spectra of 5c

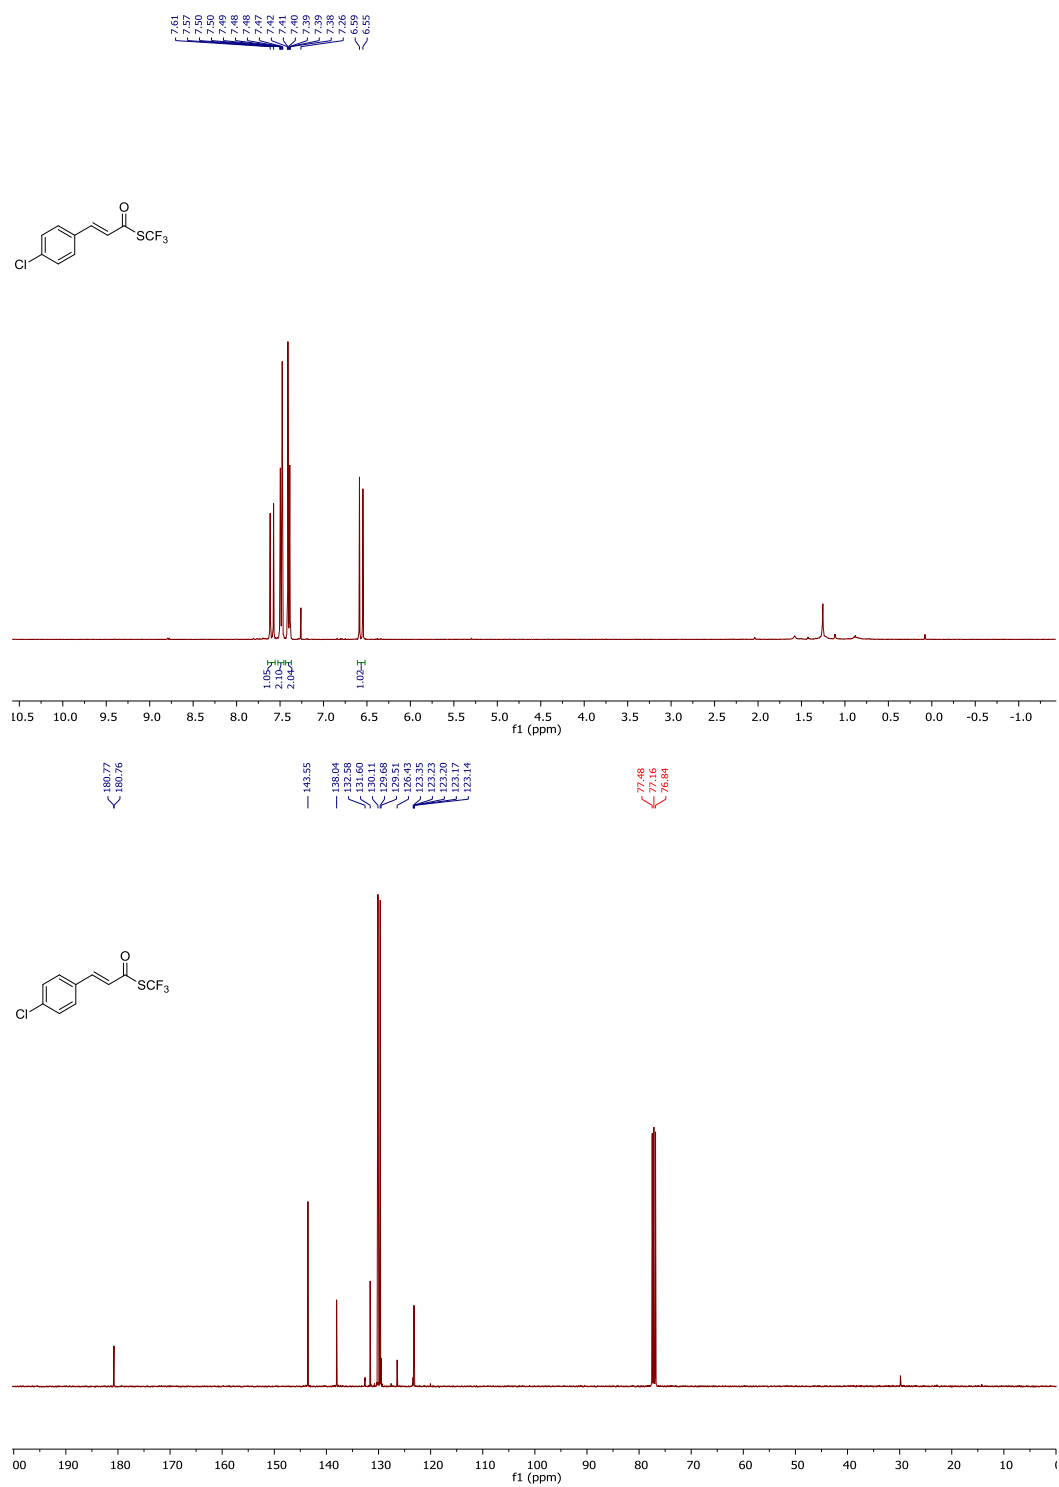

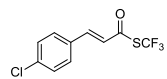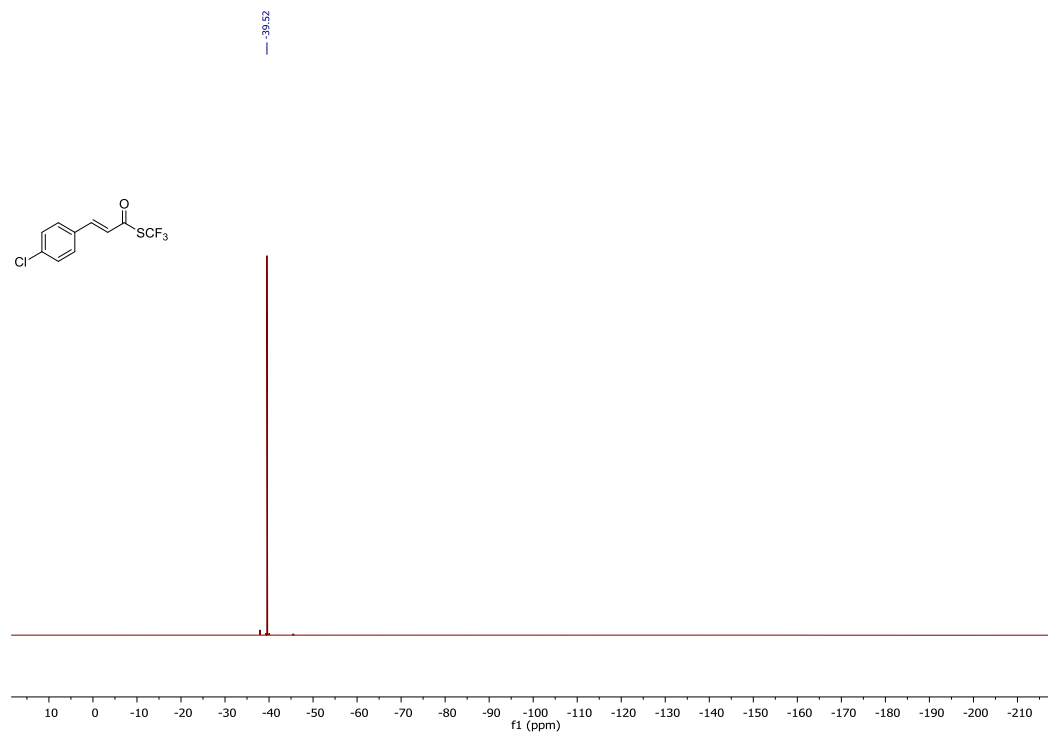

Figure S33. NMR spectra of 5d

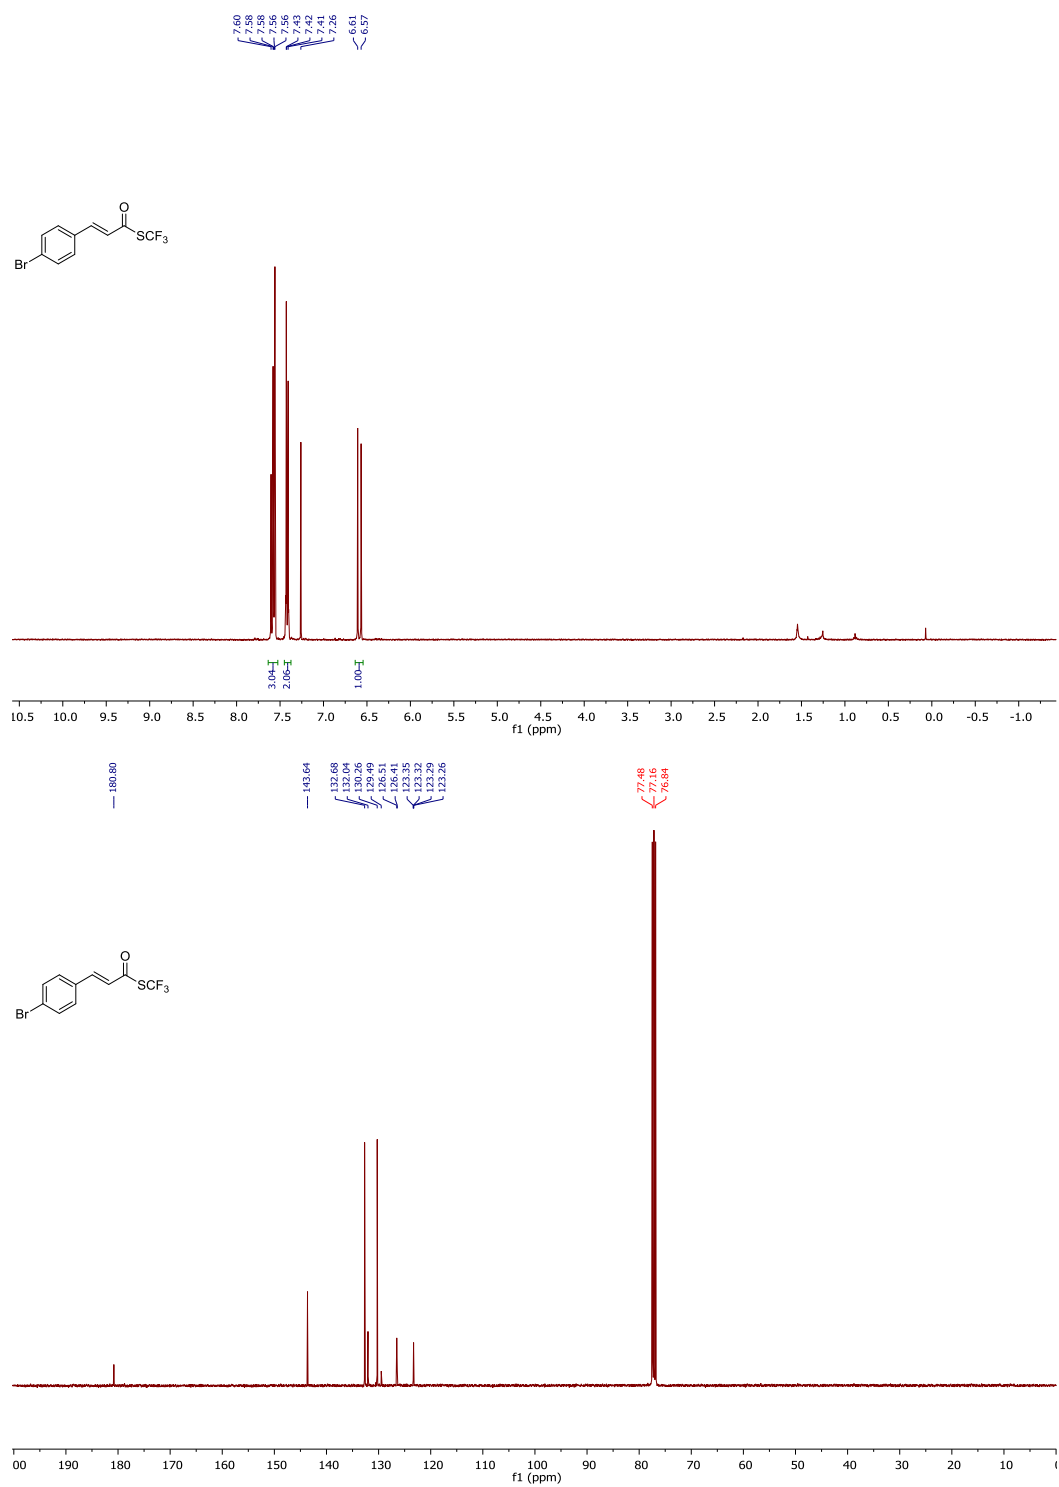

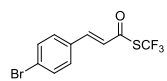

-39.52

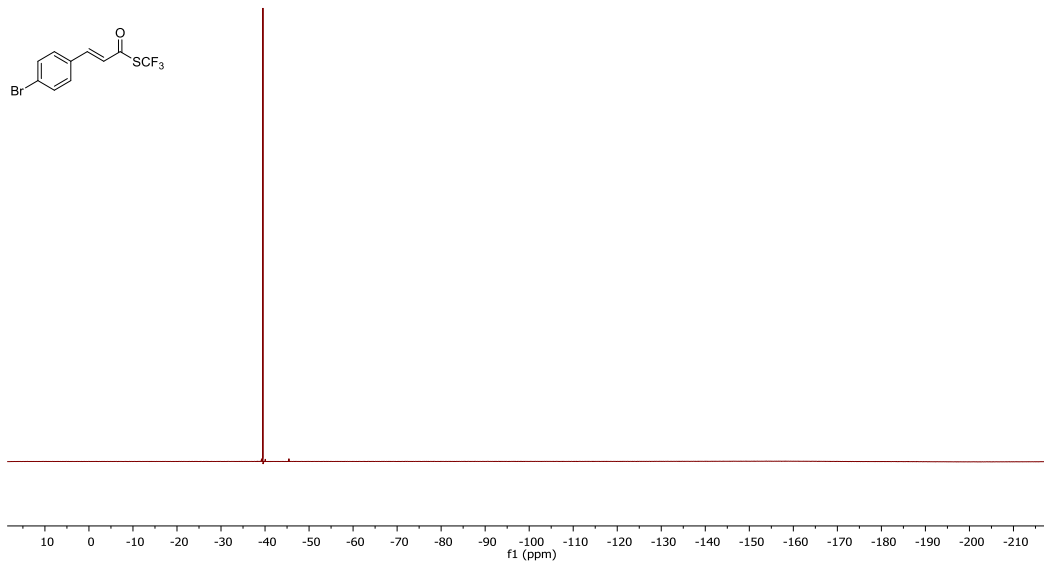

Figure S34. NMR spectra of 5e

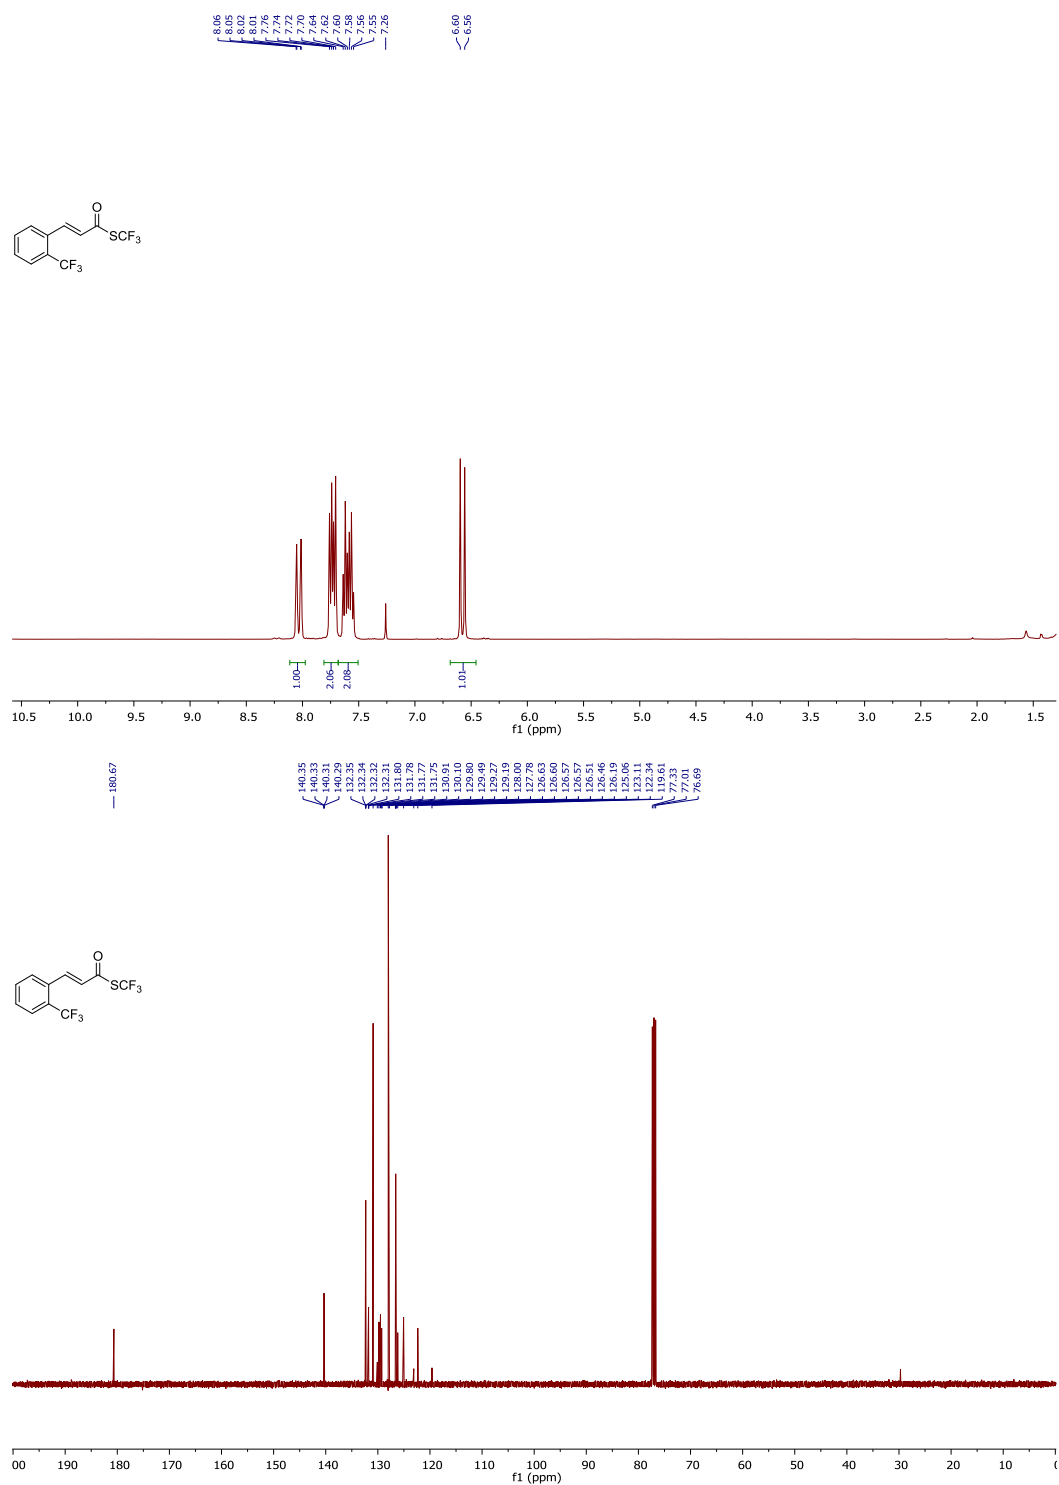

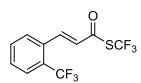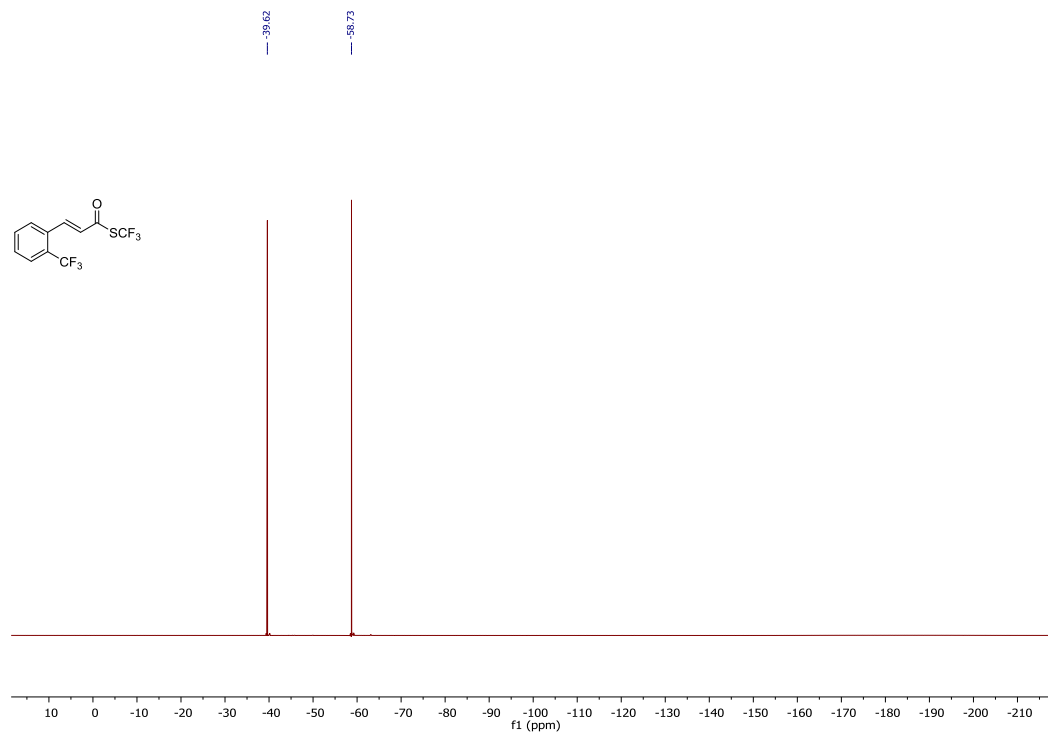

Figure S35. NMR spectra of 5f

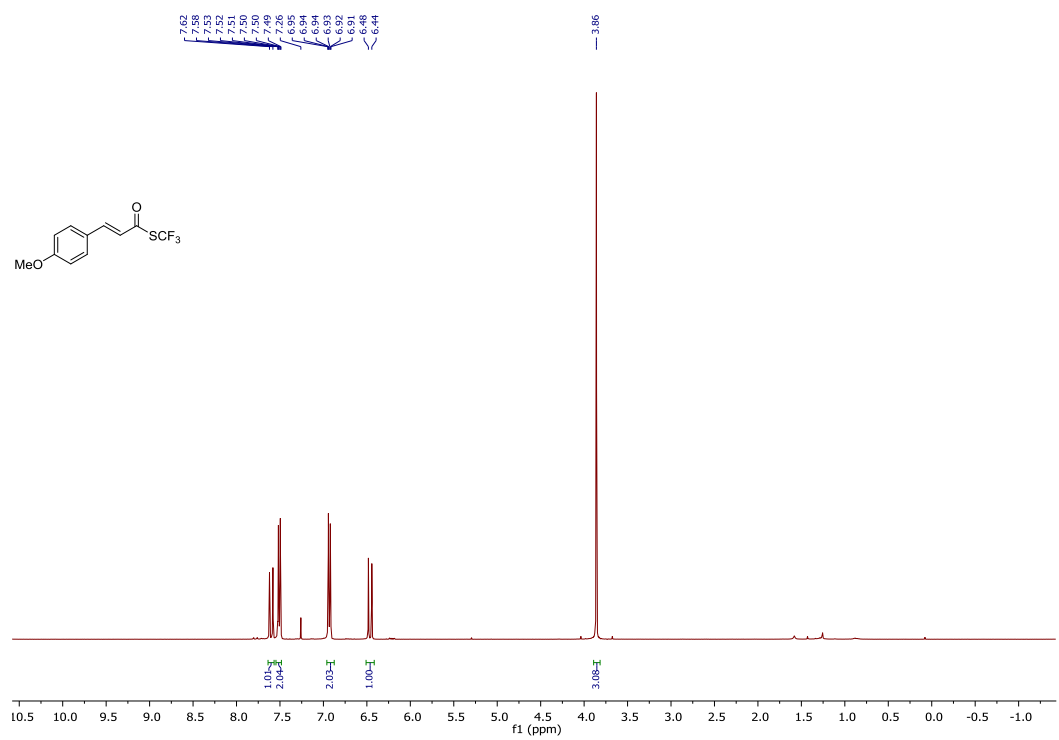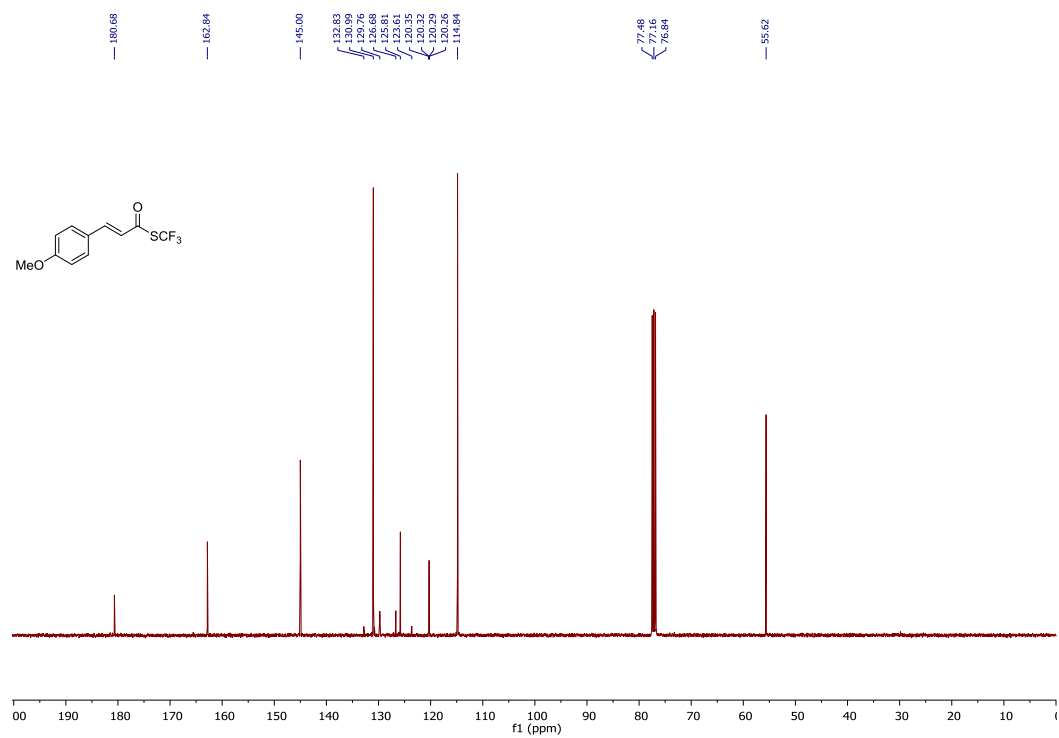

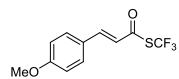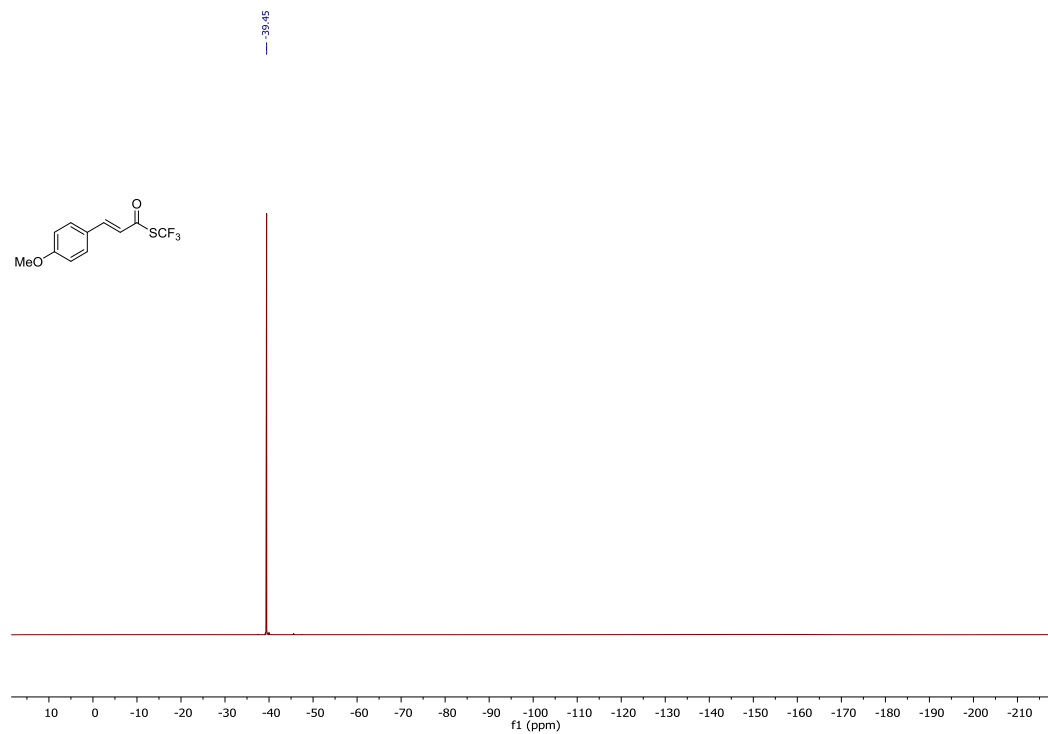



Figure S36. NMR spectra of 5g

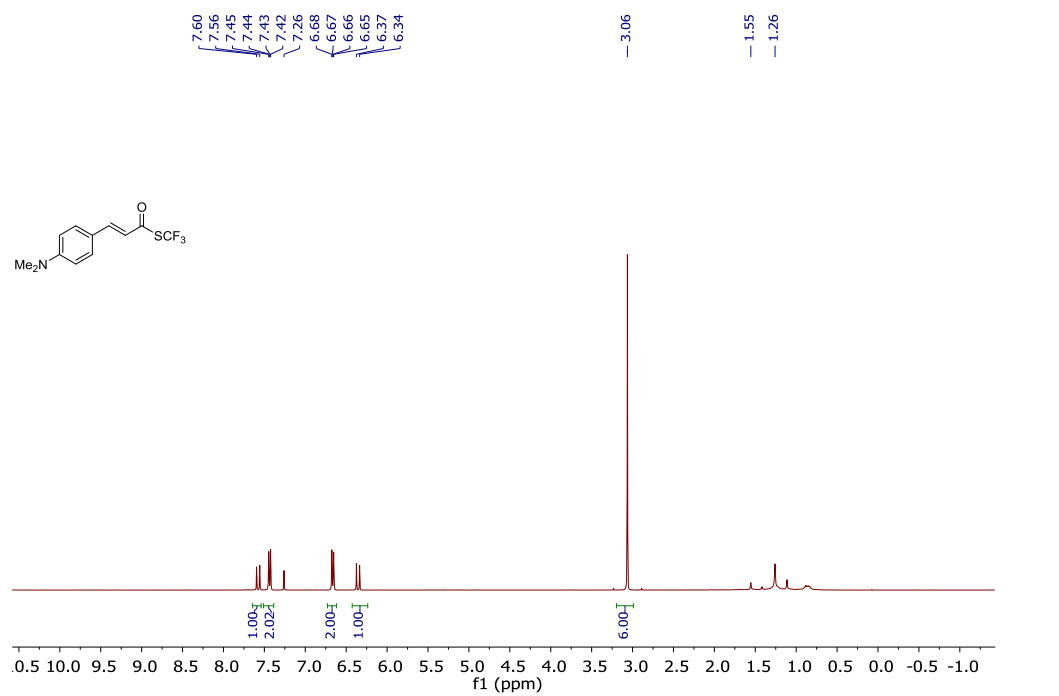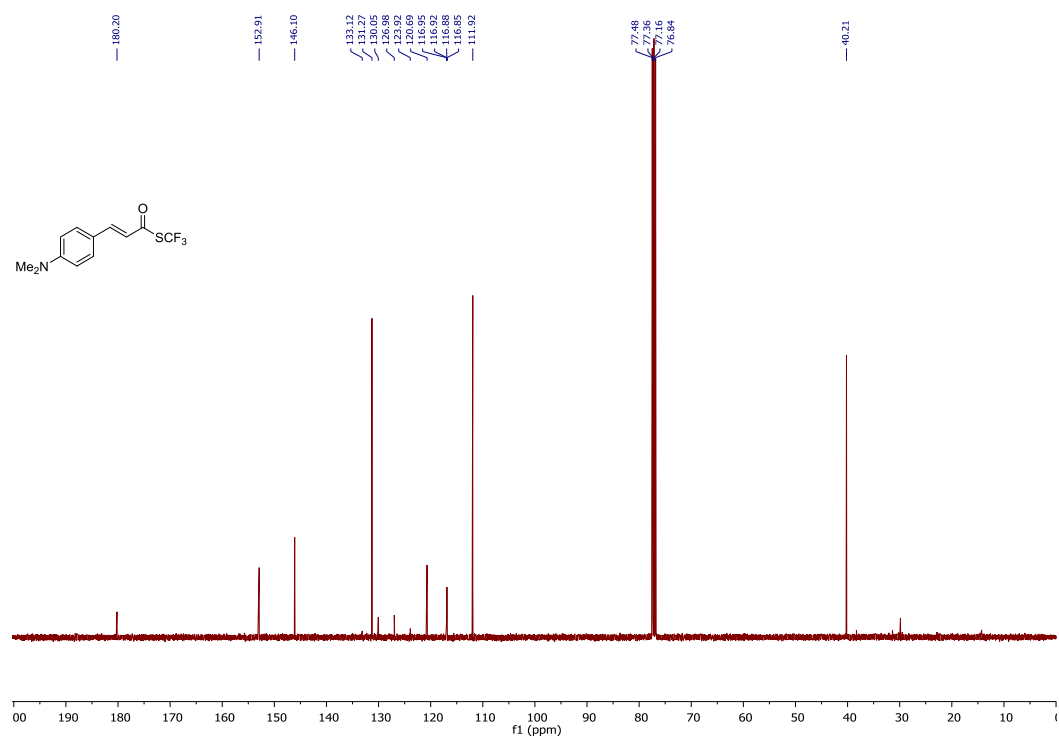

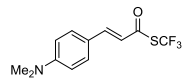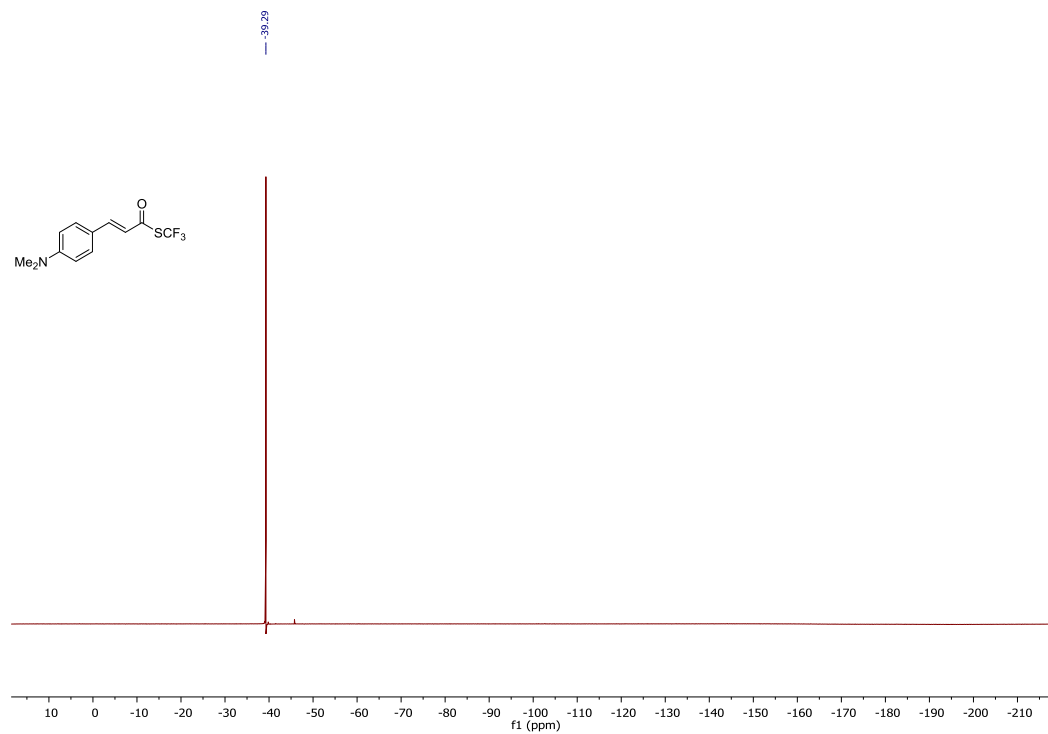

Figure S37. NMR spectra of 5h

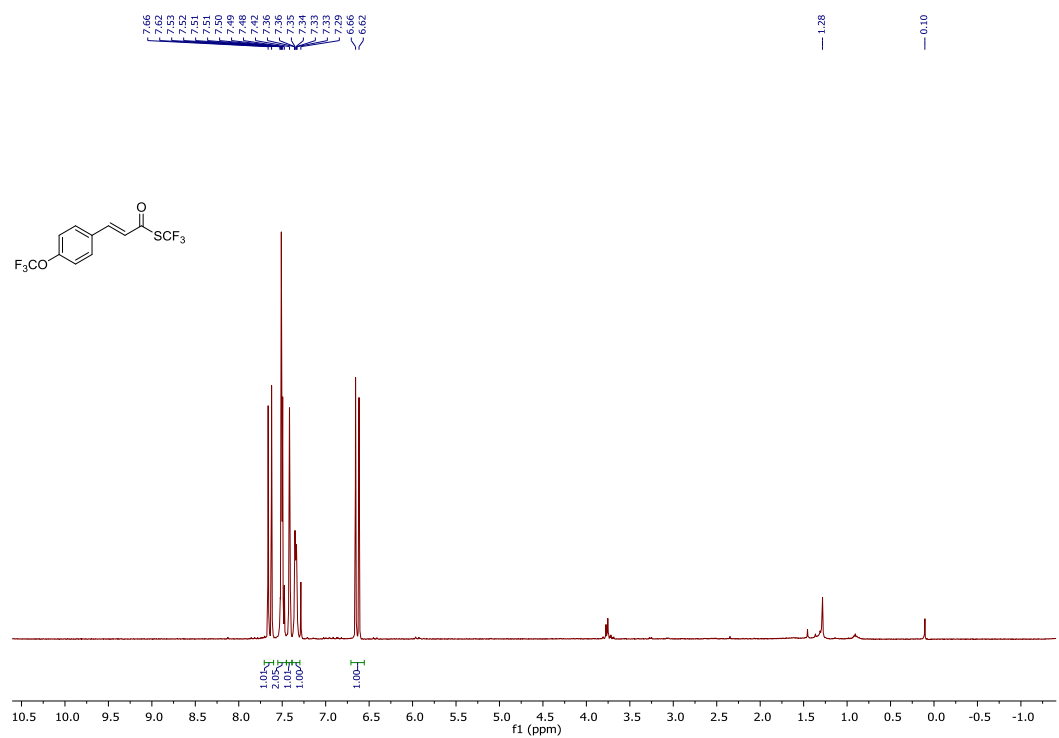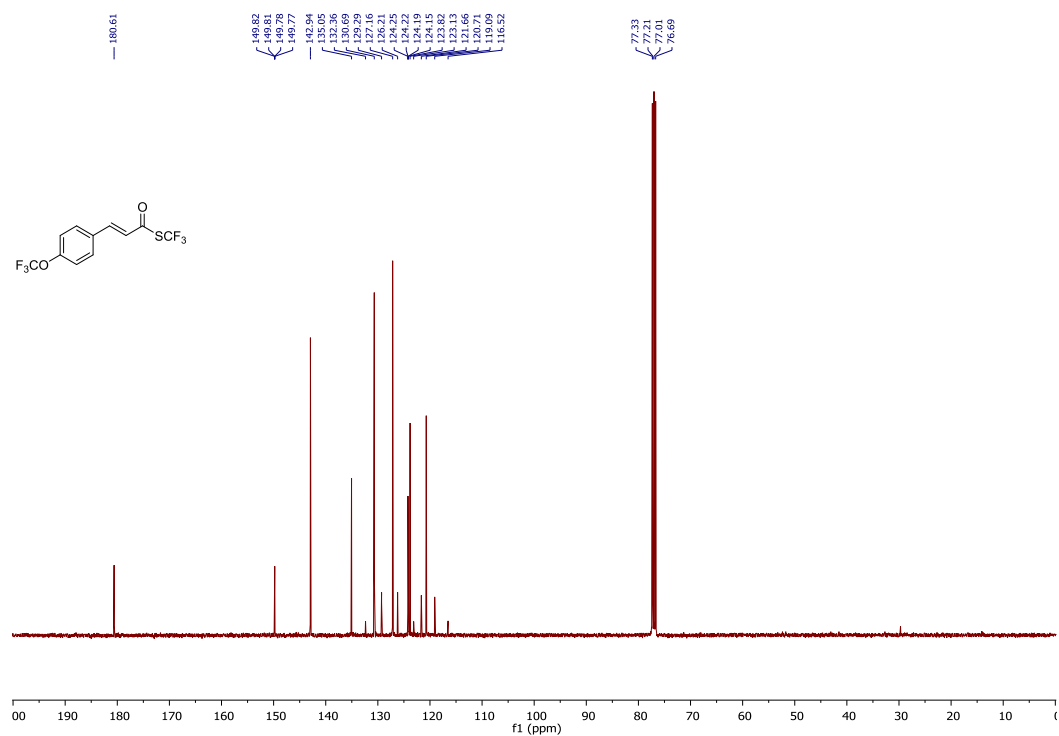

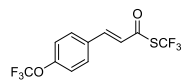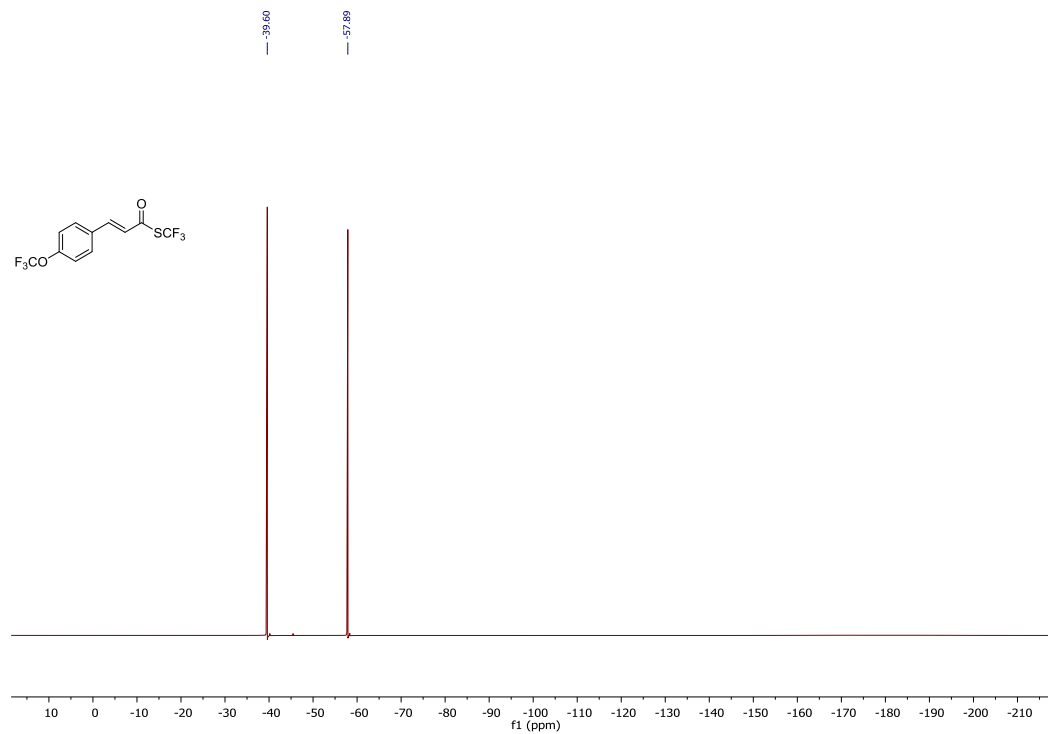

Figure S38. NMR spectra of 6a

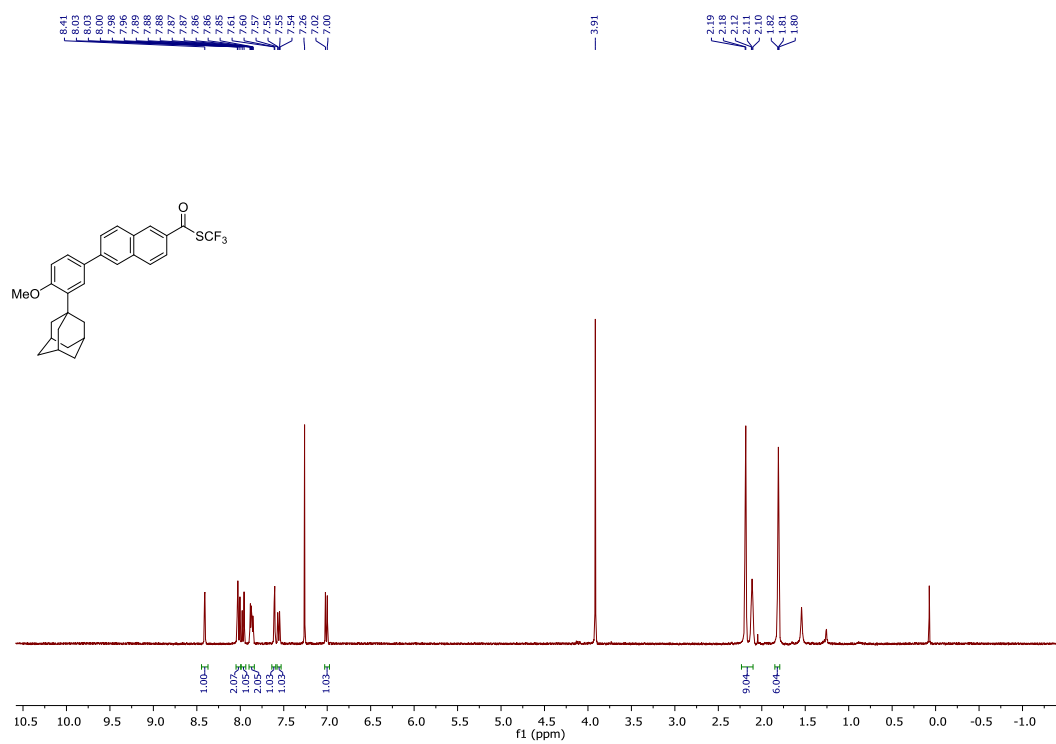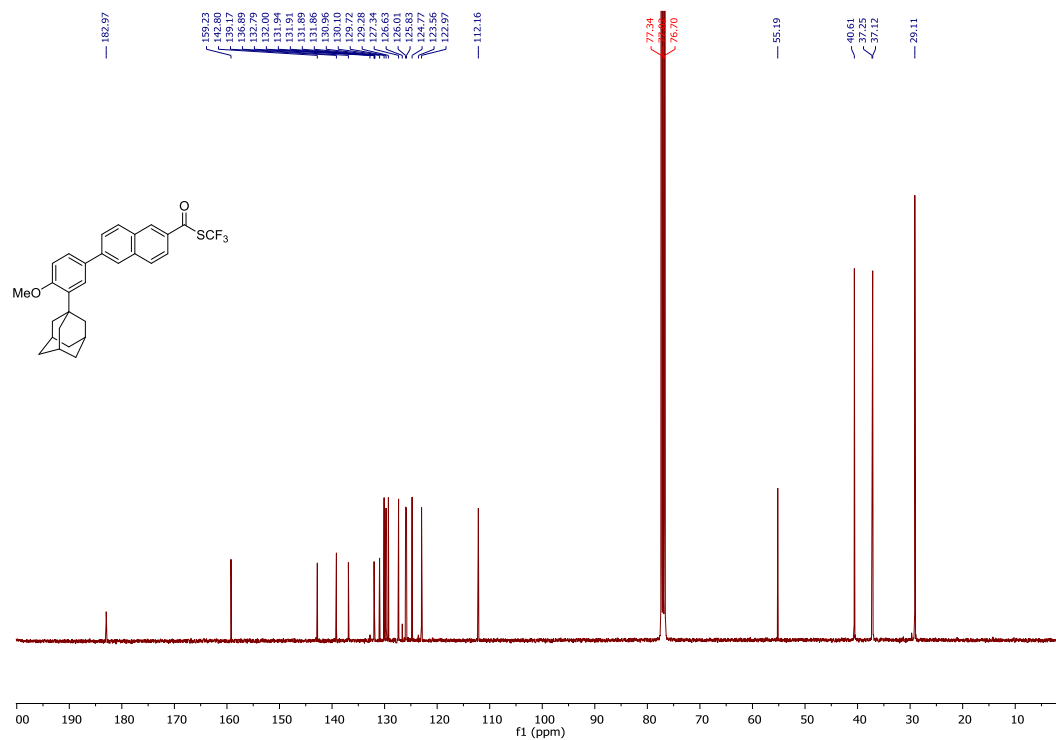

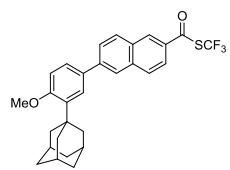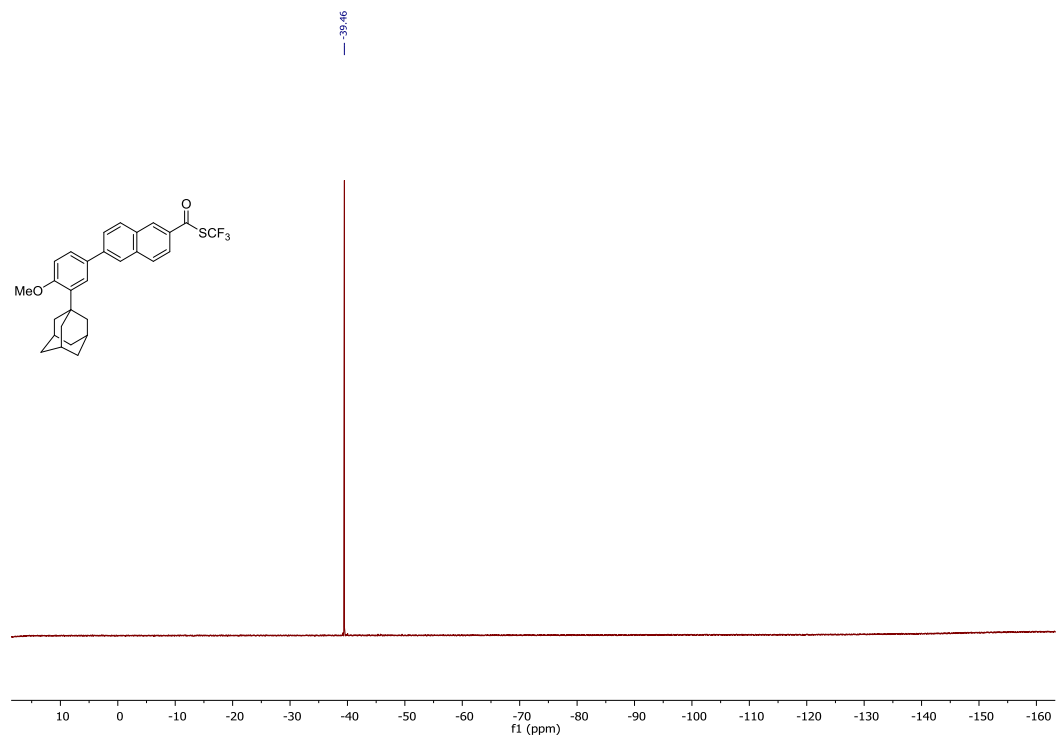

Figure S39. NMR spectra of 6b

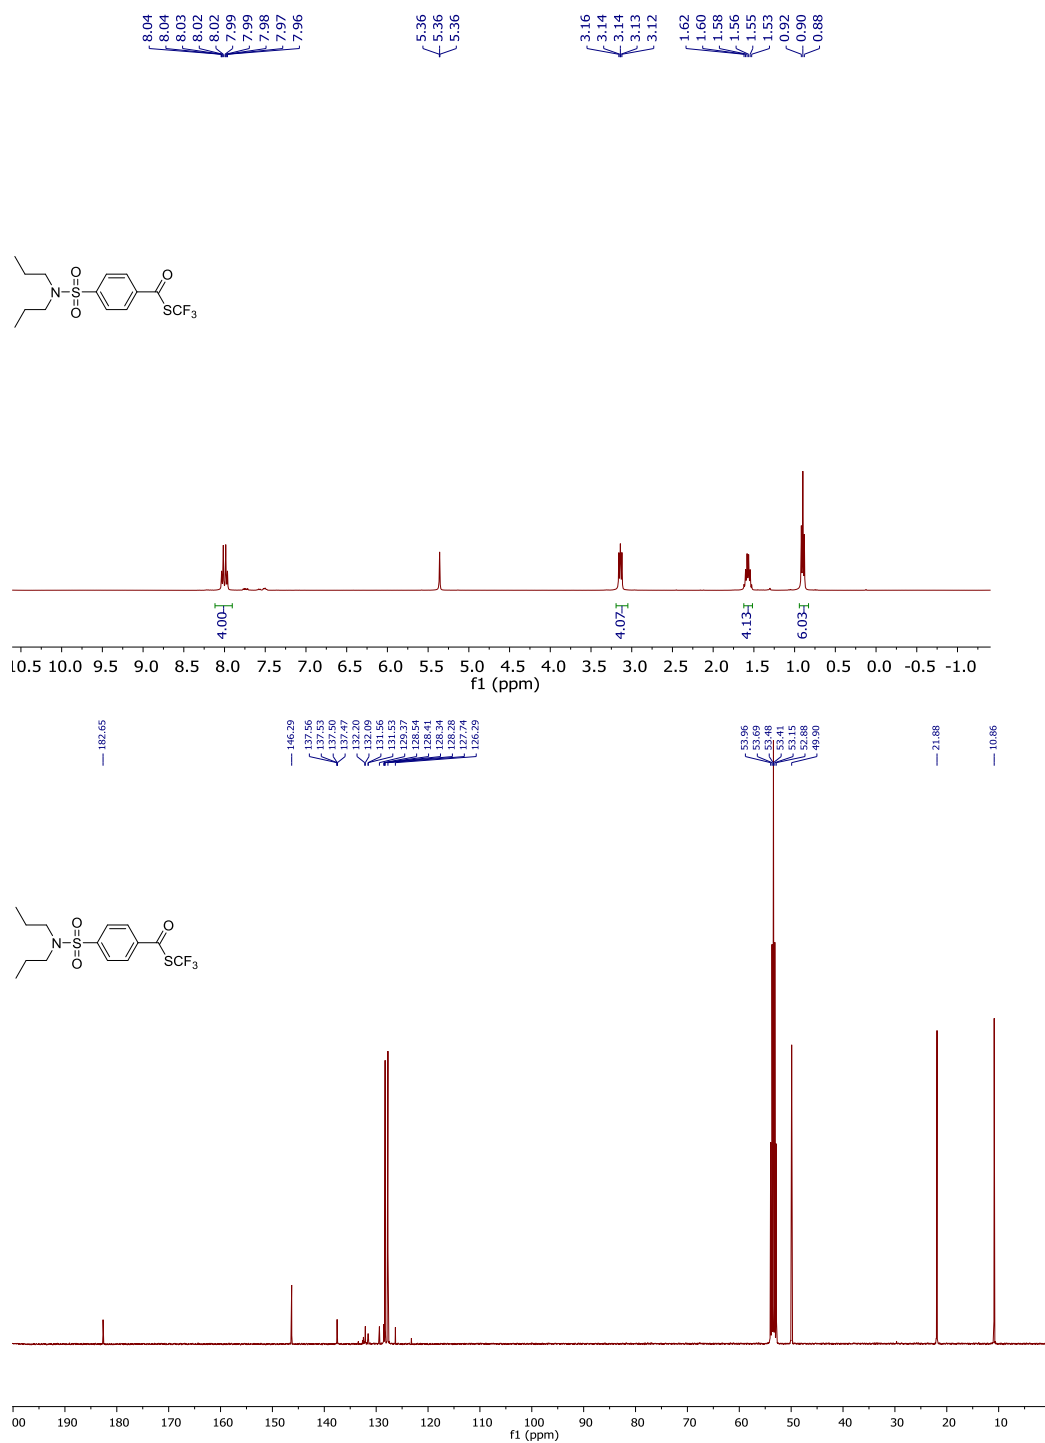

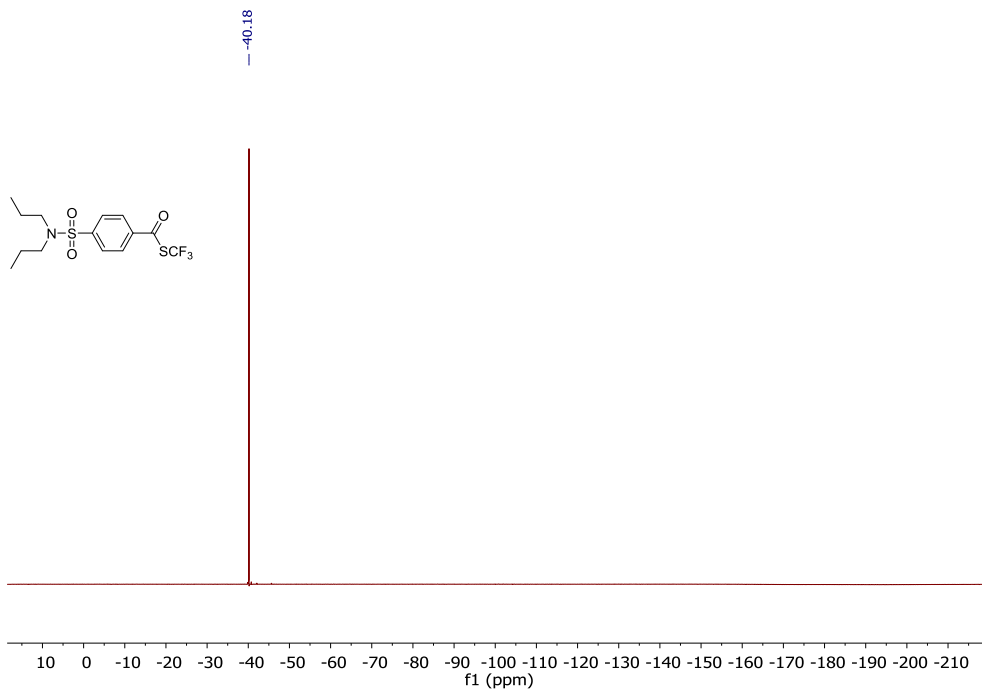



**Figure S40. NMR spectra of 6c**

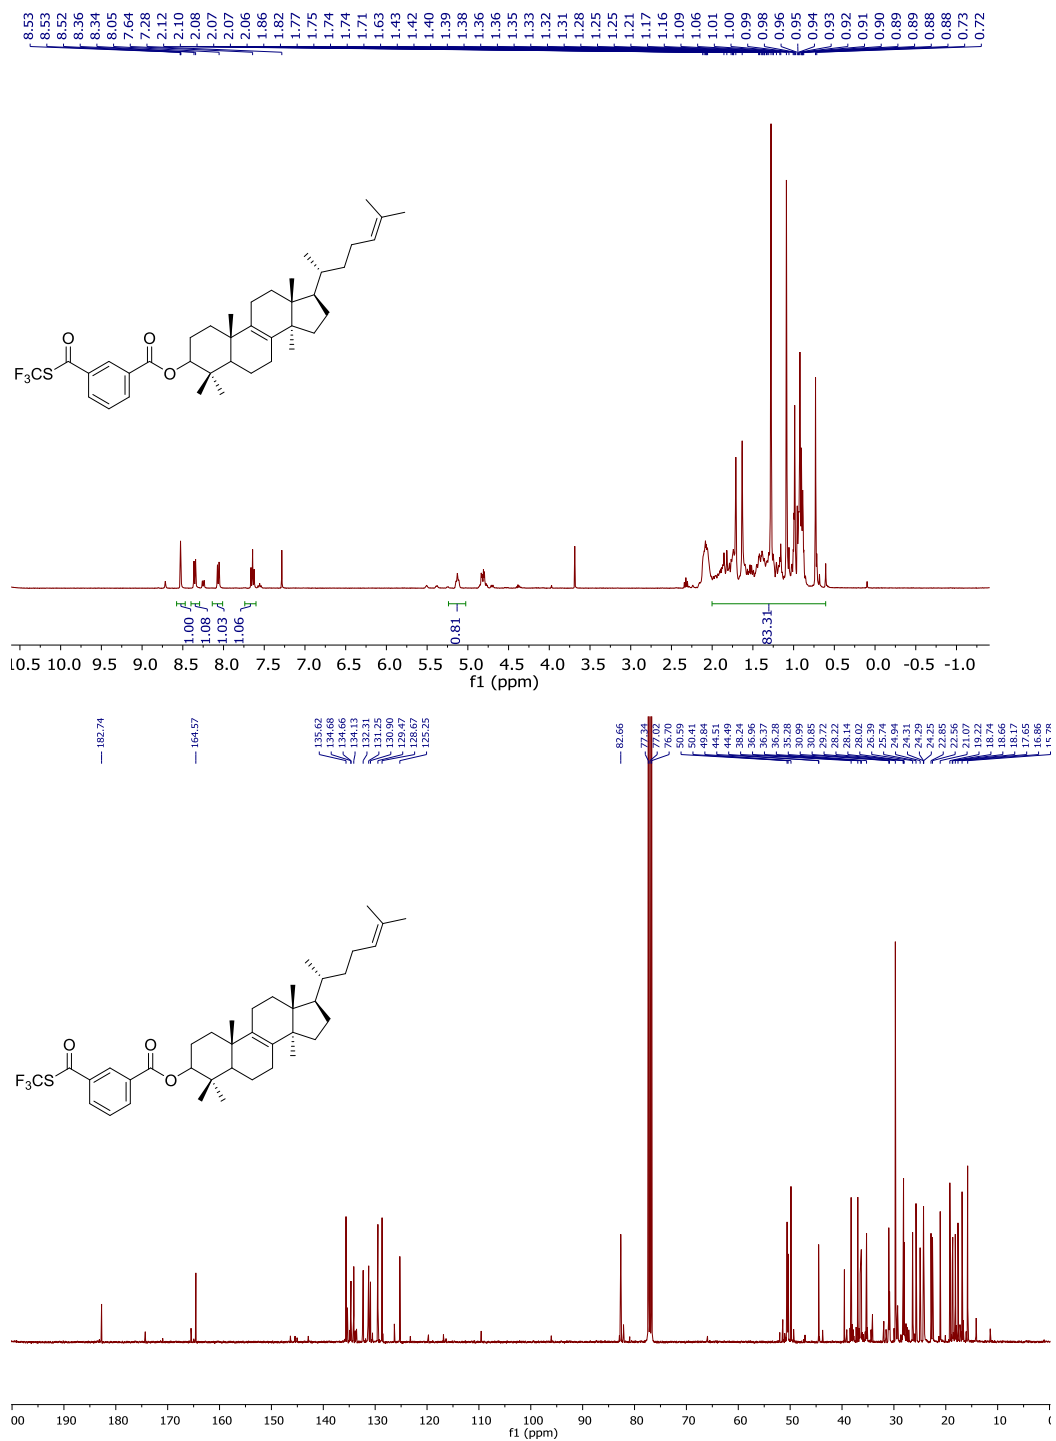

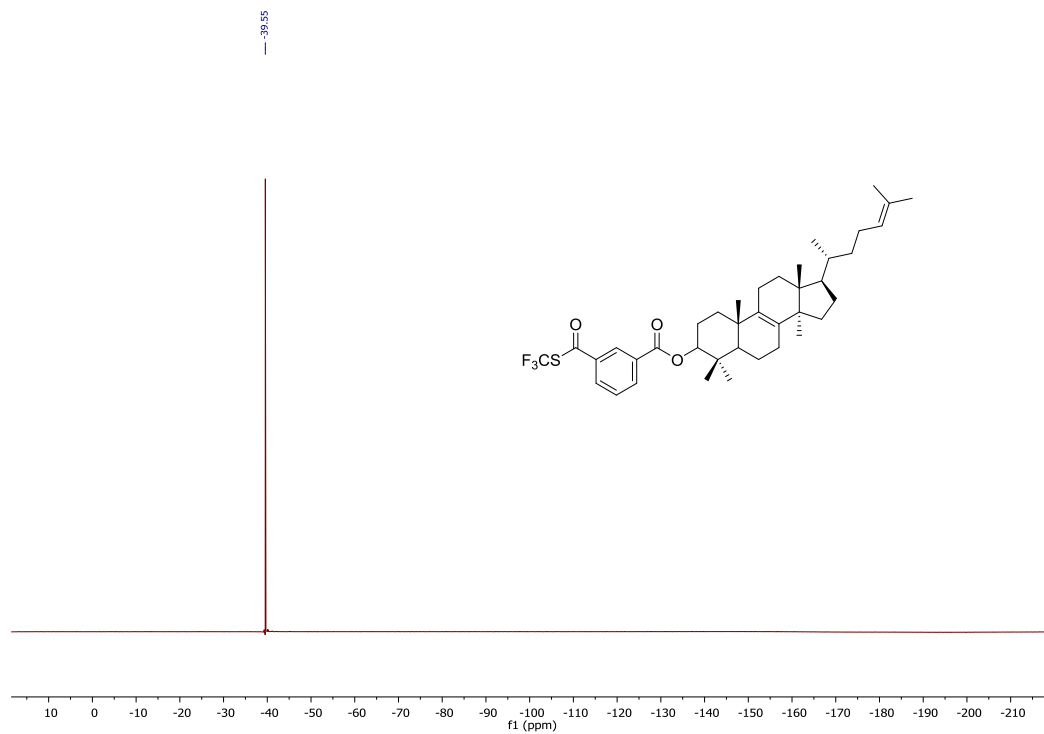

**Figure S41. NMR spectra of 6d**

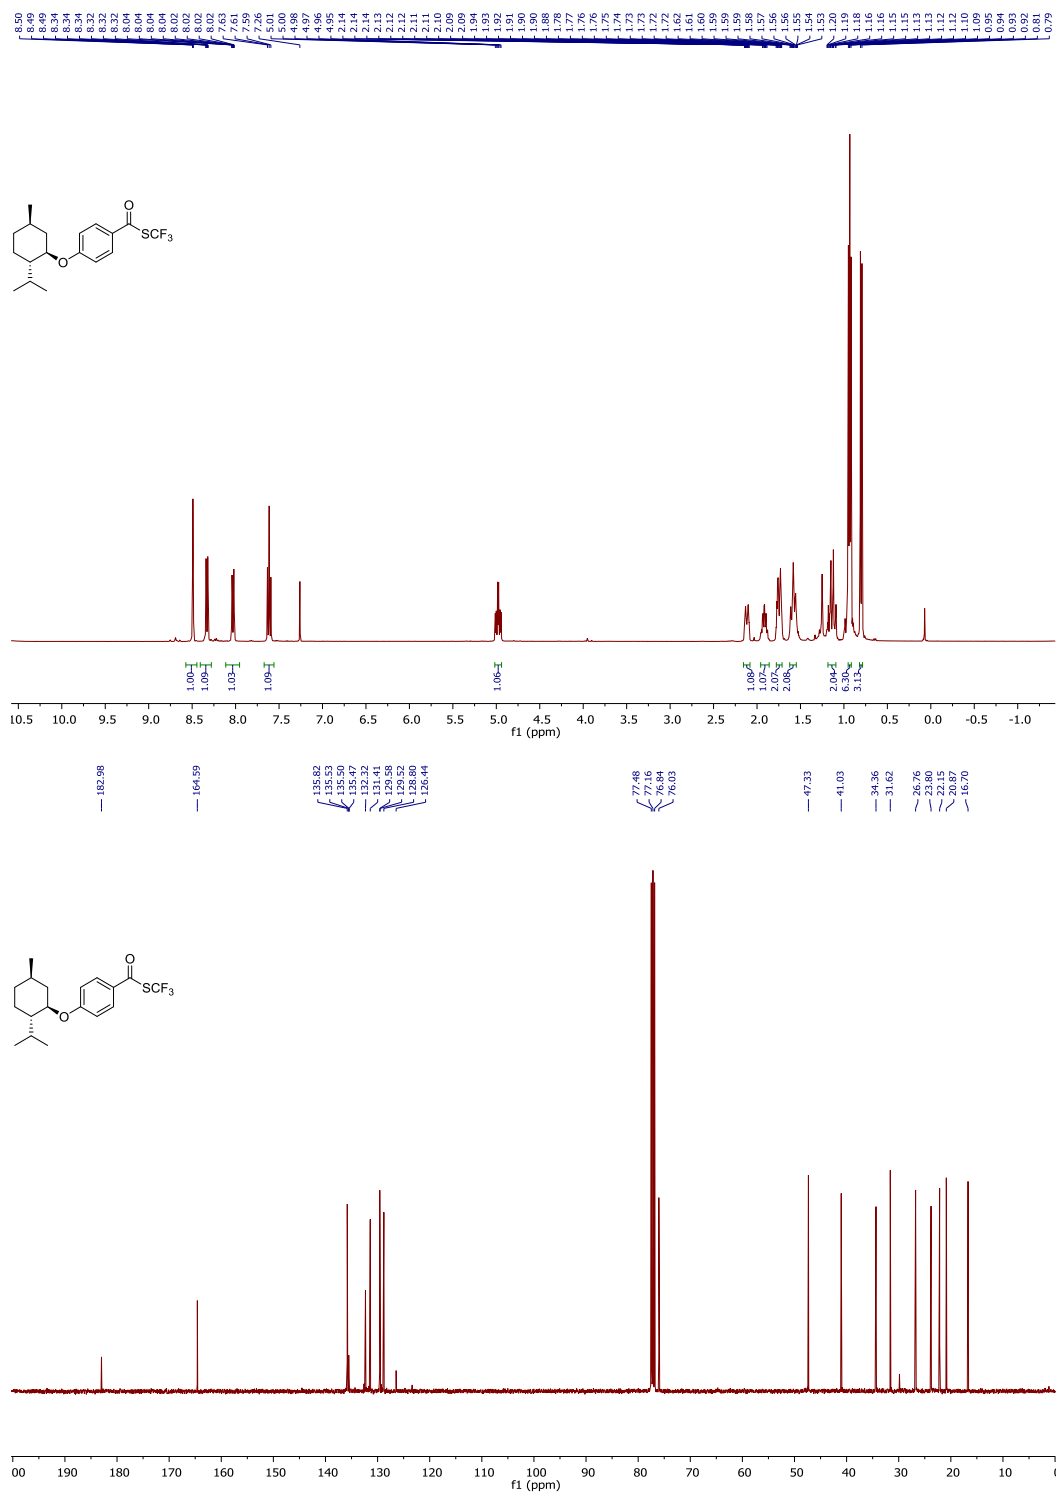

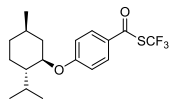

— 39.59

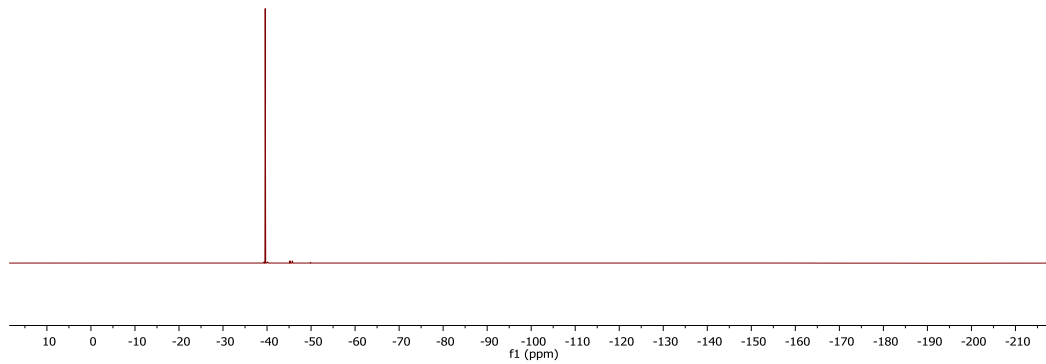

Figure S42. NMR spectra of 6e

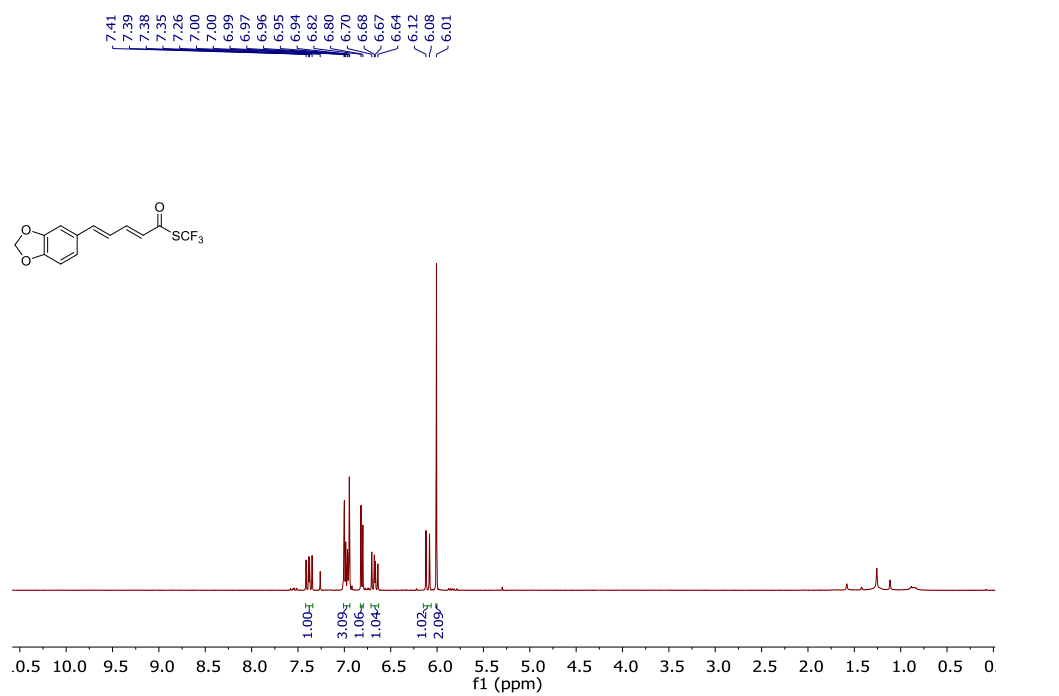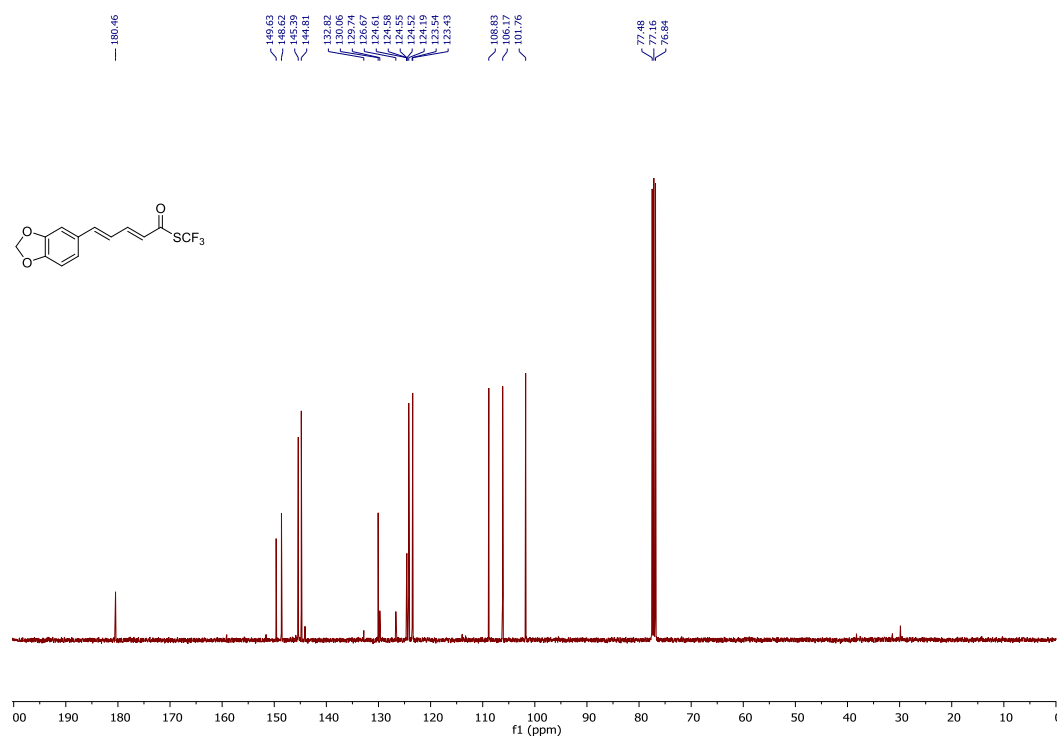

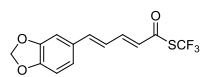

-39.42

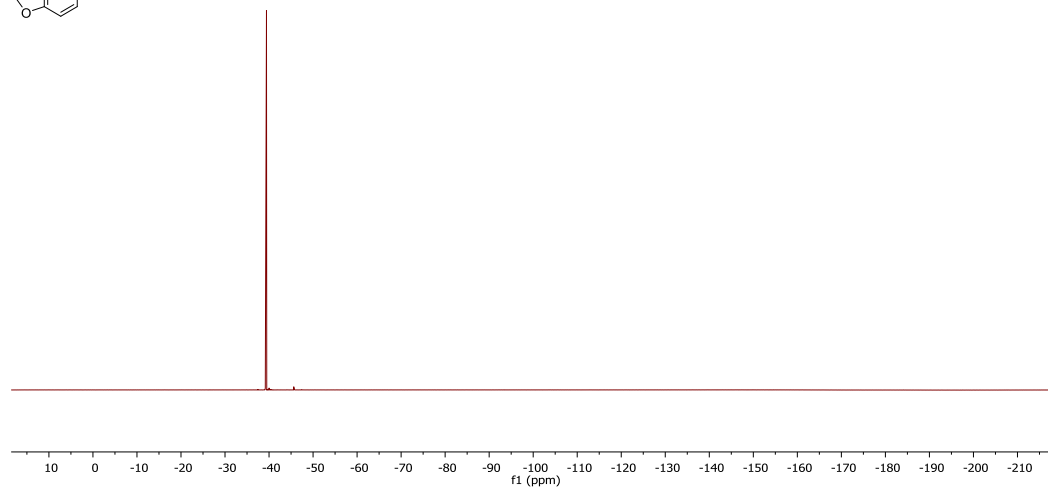

Figure S43. NMR spectra of 6f

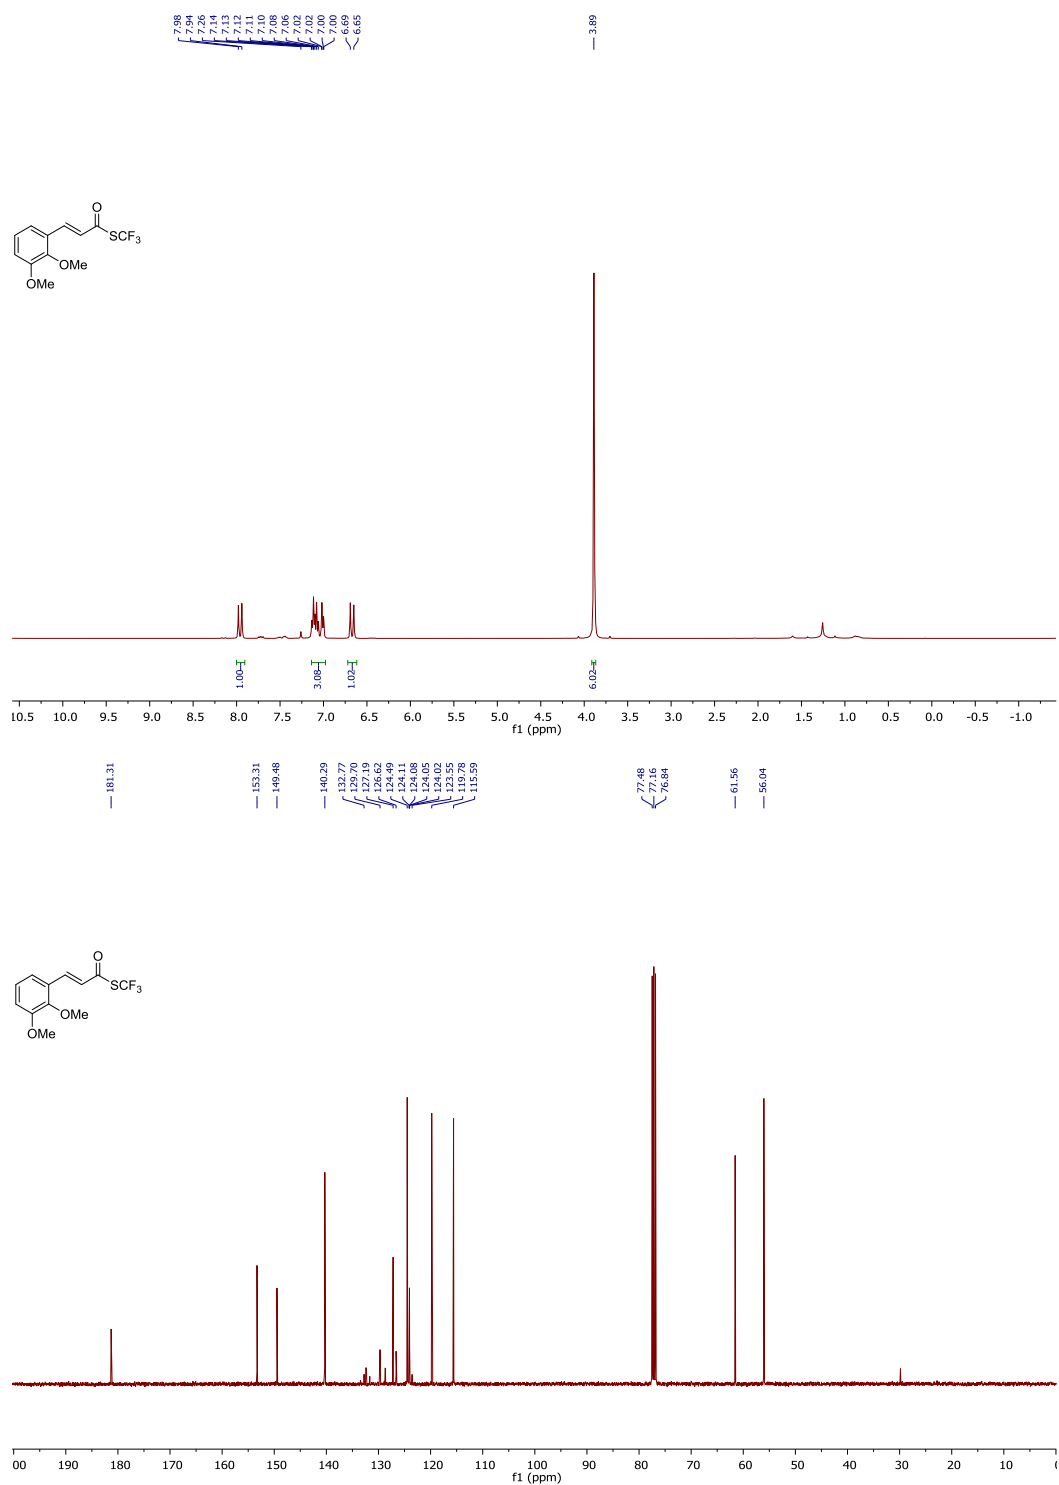

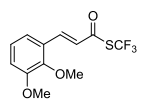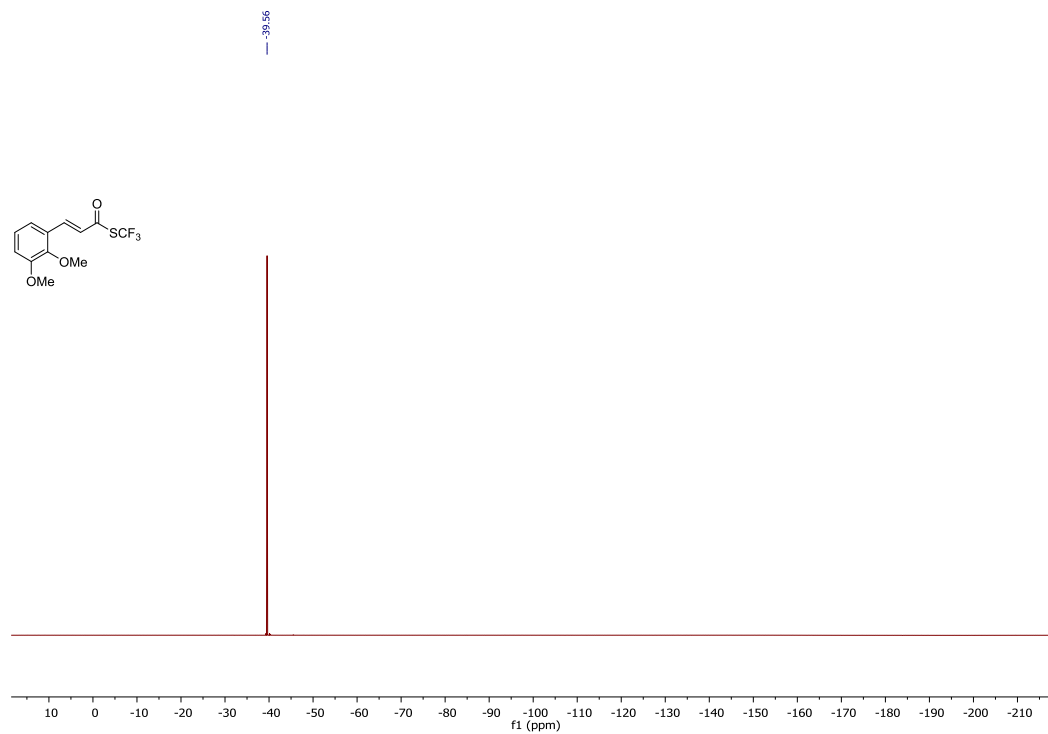



Figure S44. NMR spectra of 6g

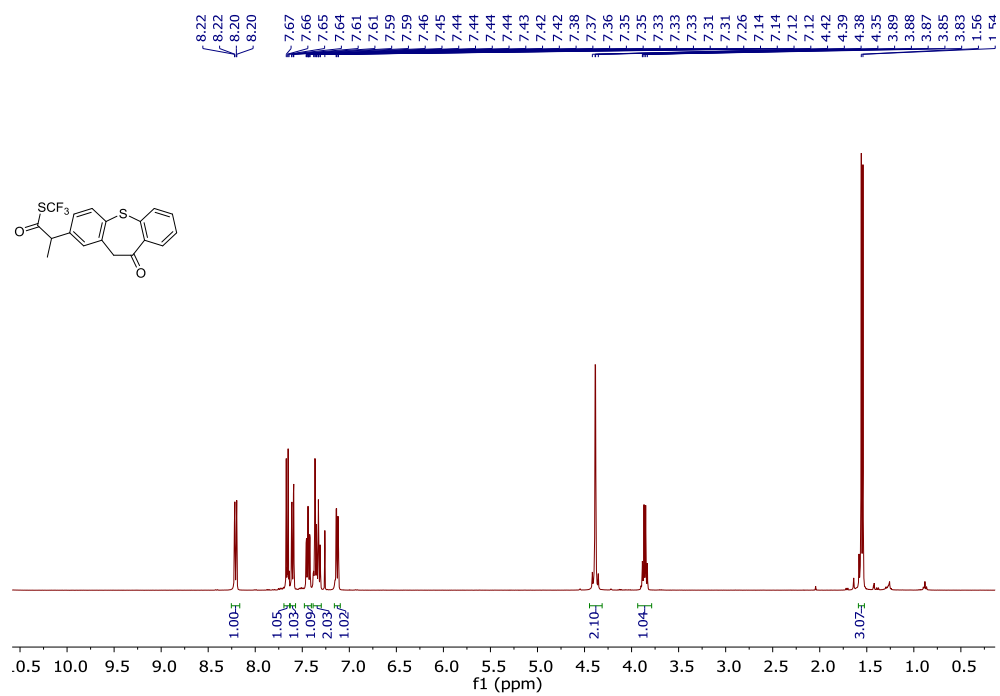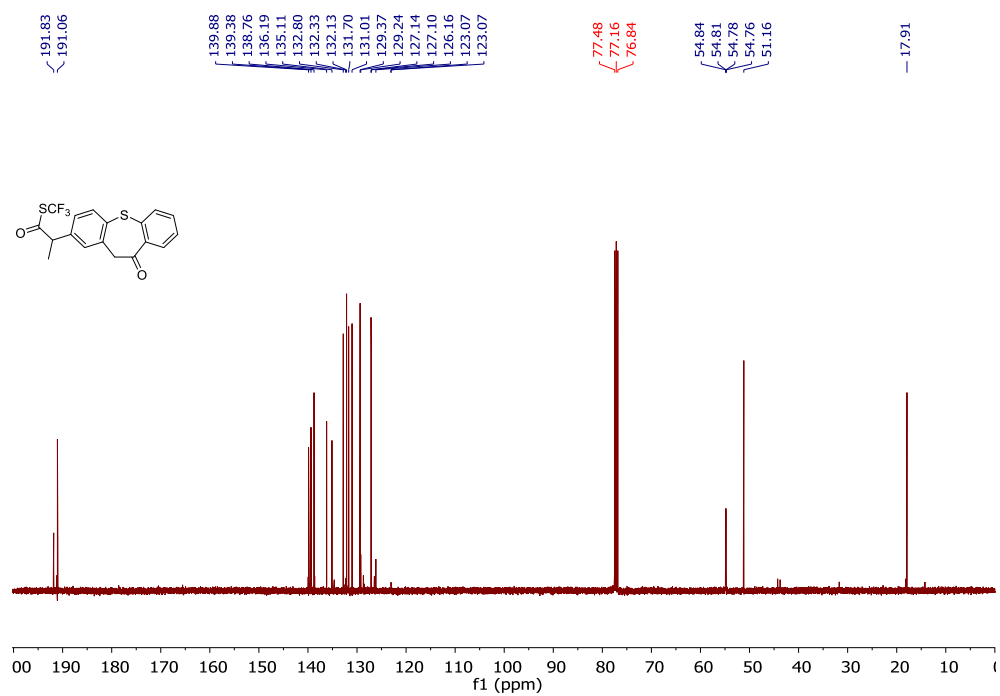

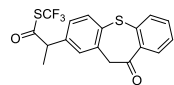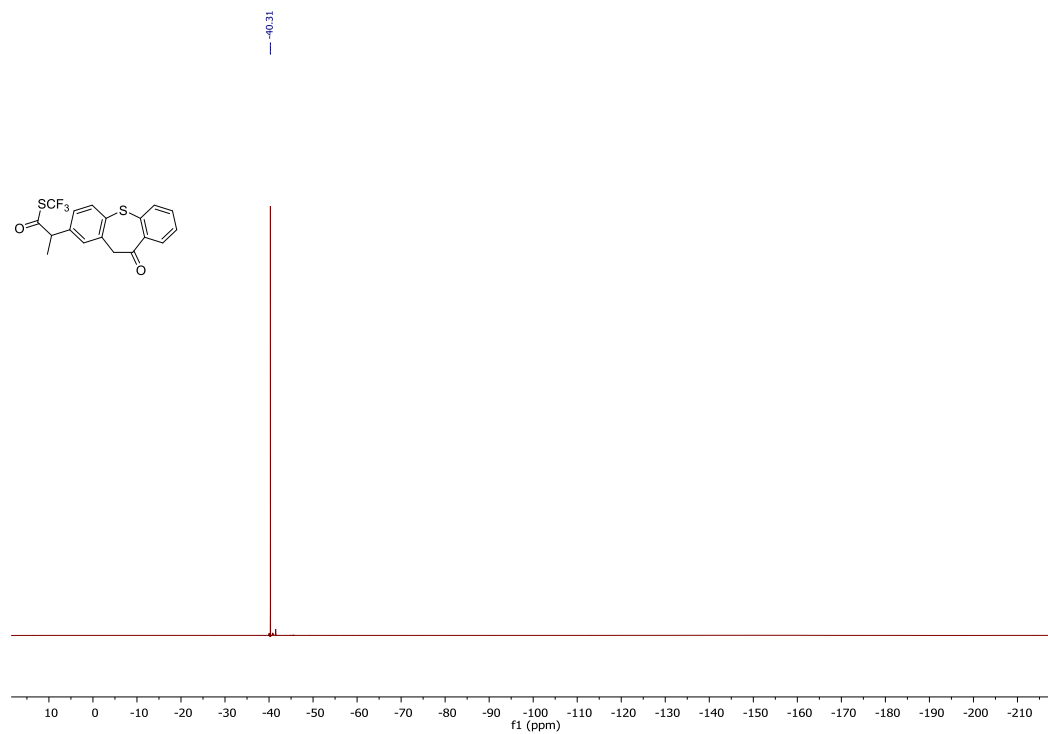

Figure S45. NMR spectra of 6h

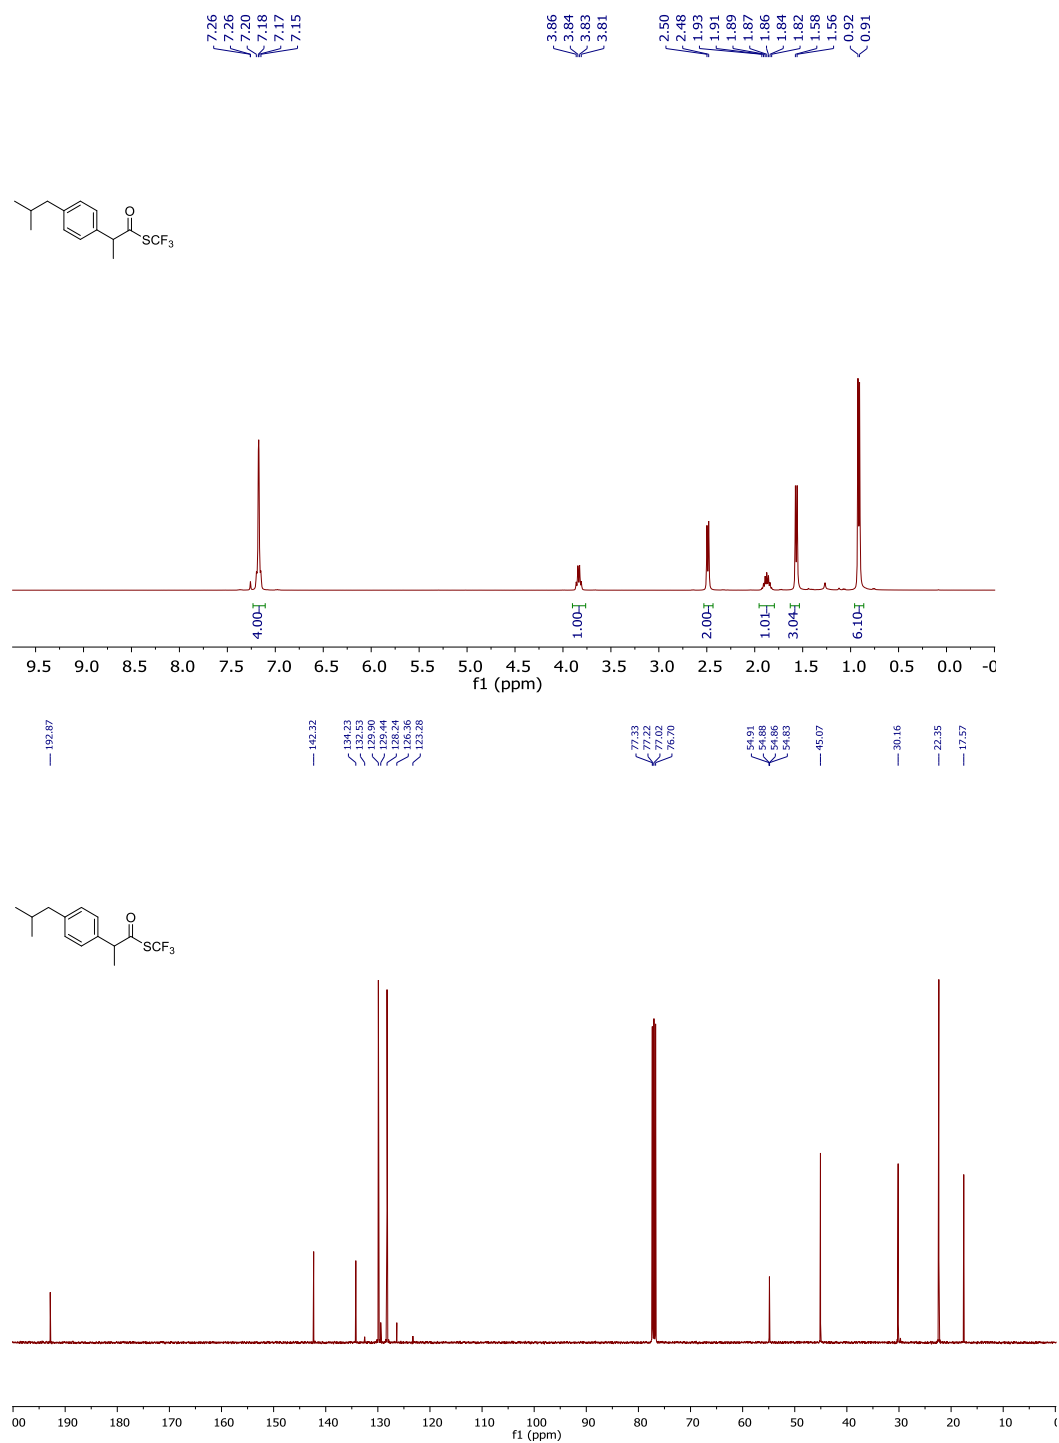

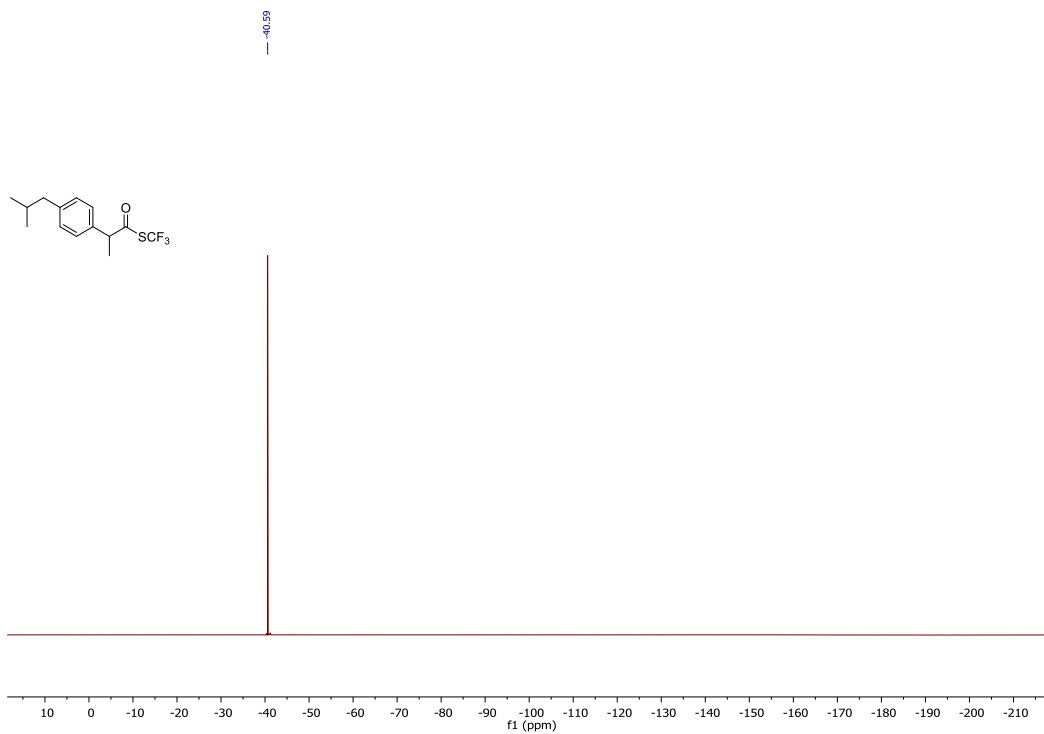

Figure S46. NMR spectra of 6i

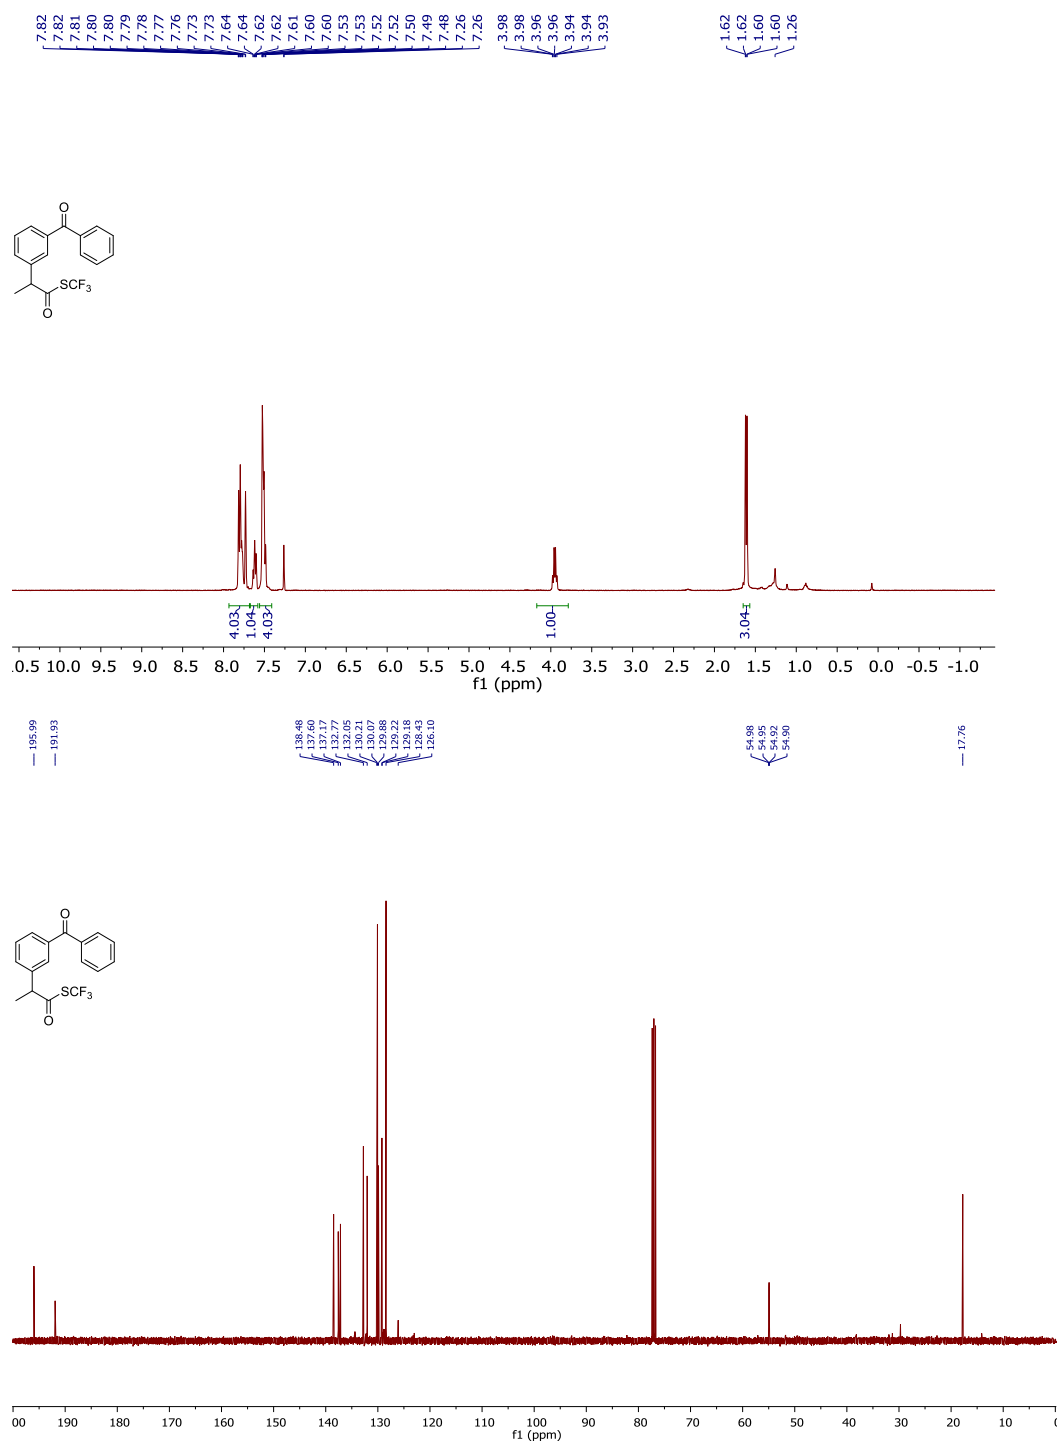

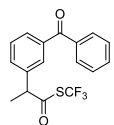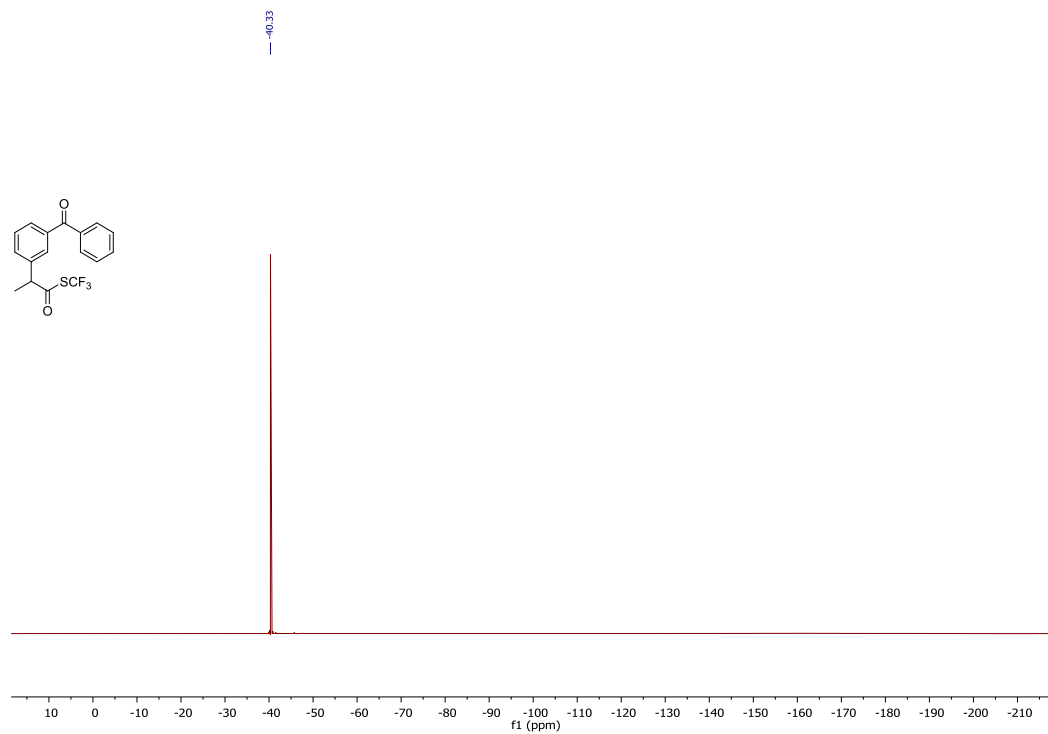

**Figure S47. NMR spectra of 6j**

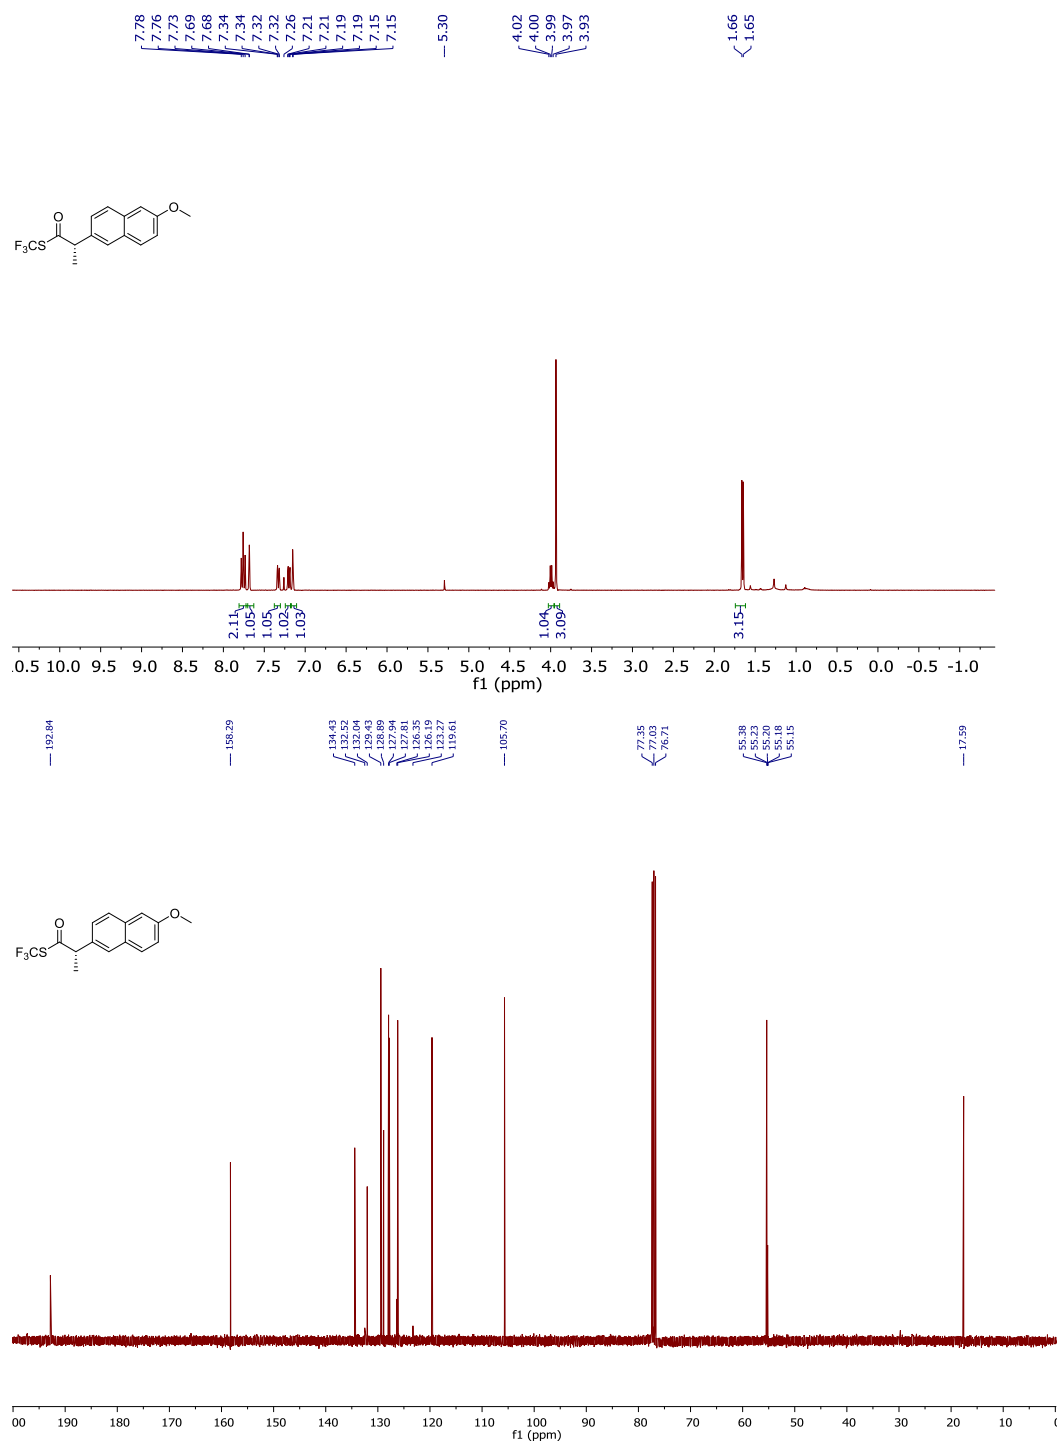

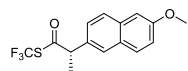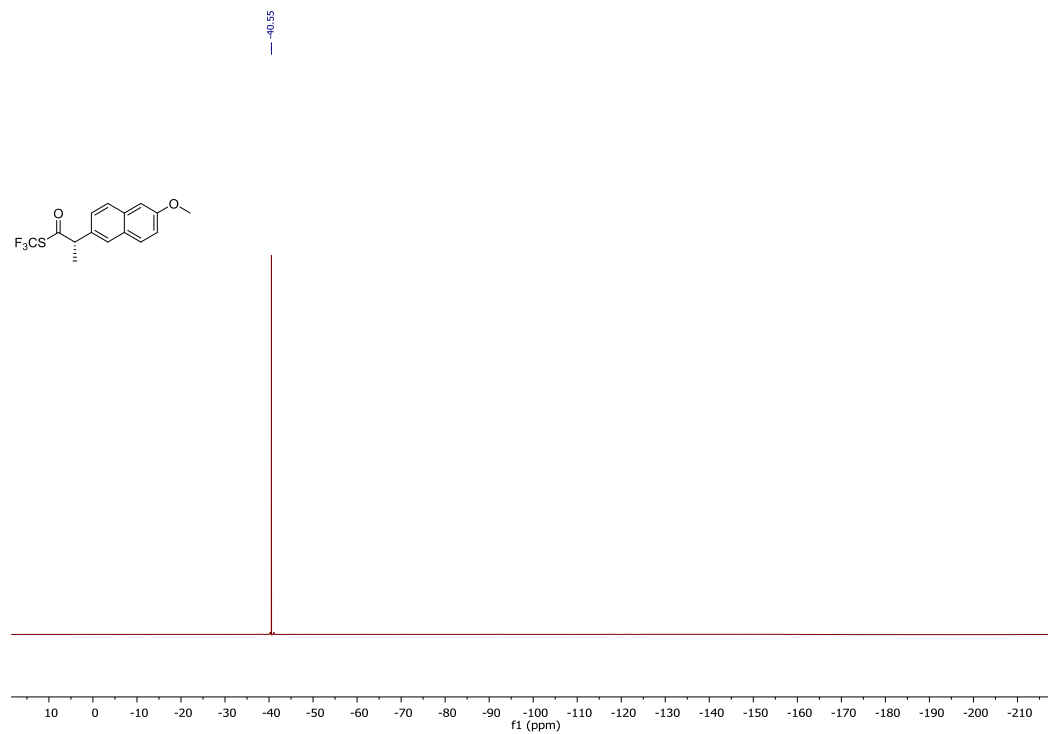



Figure S48. NMR spectra of 6k

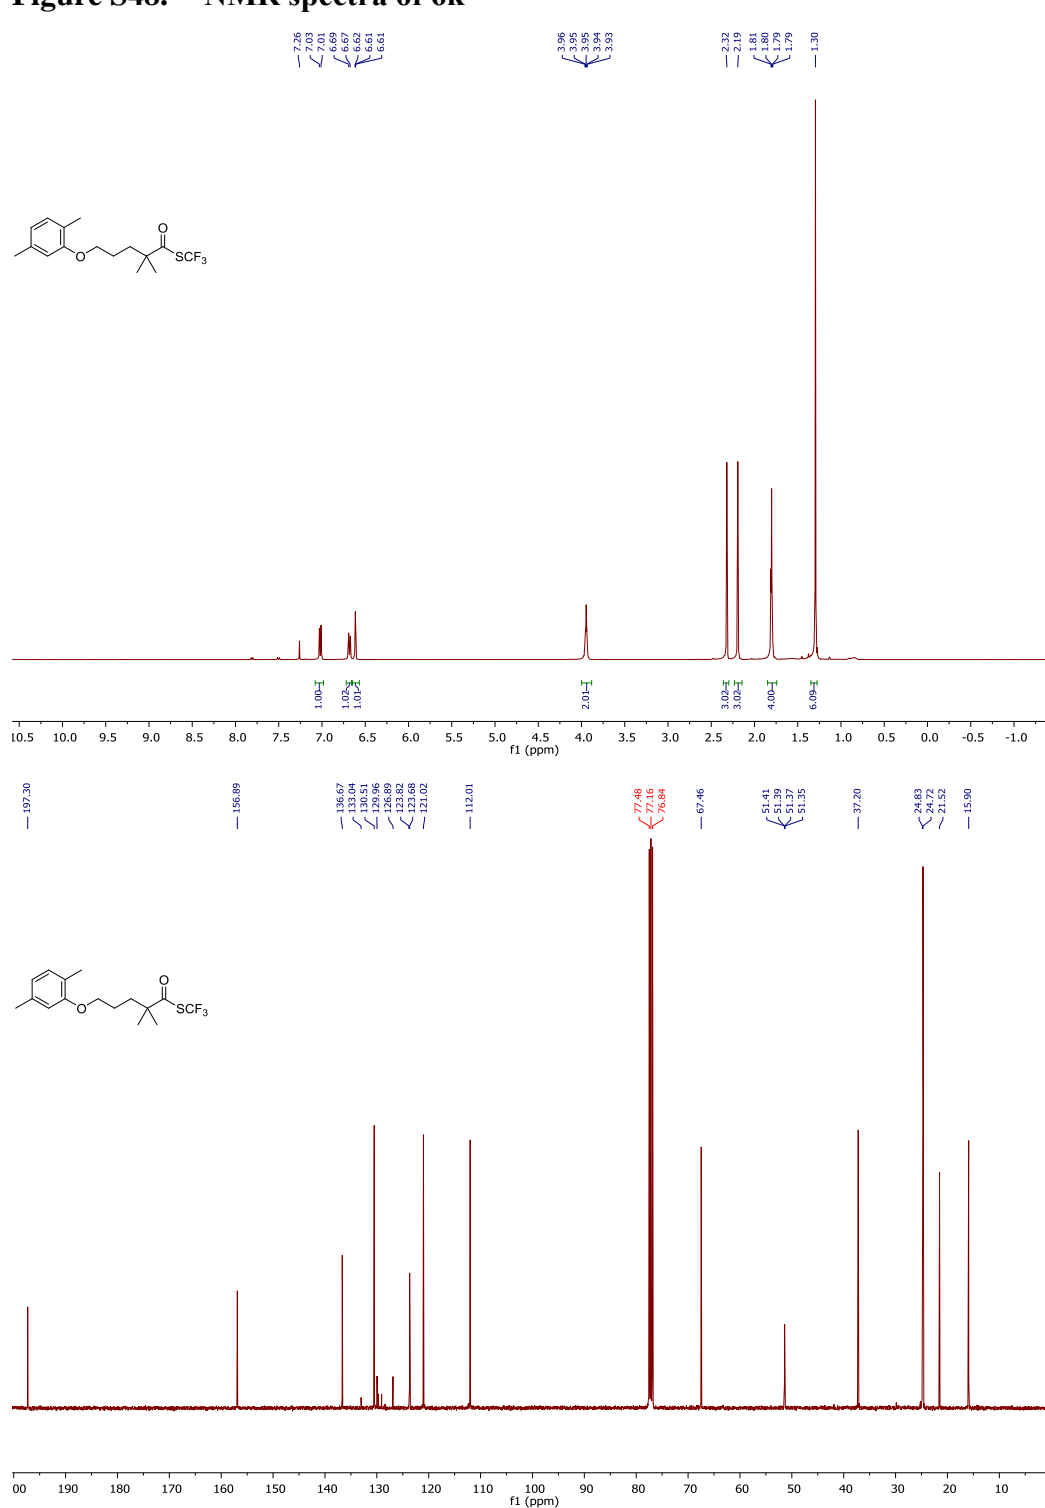

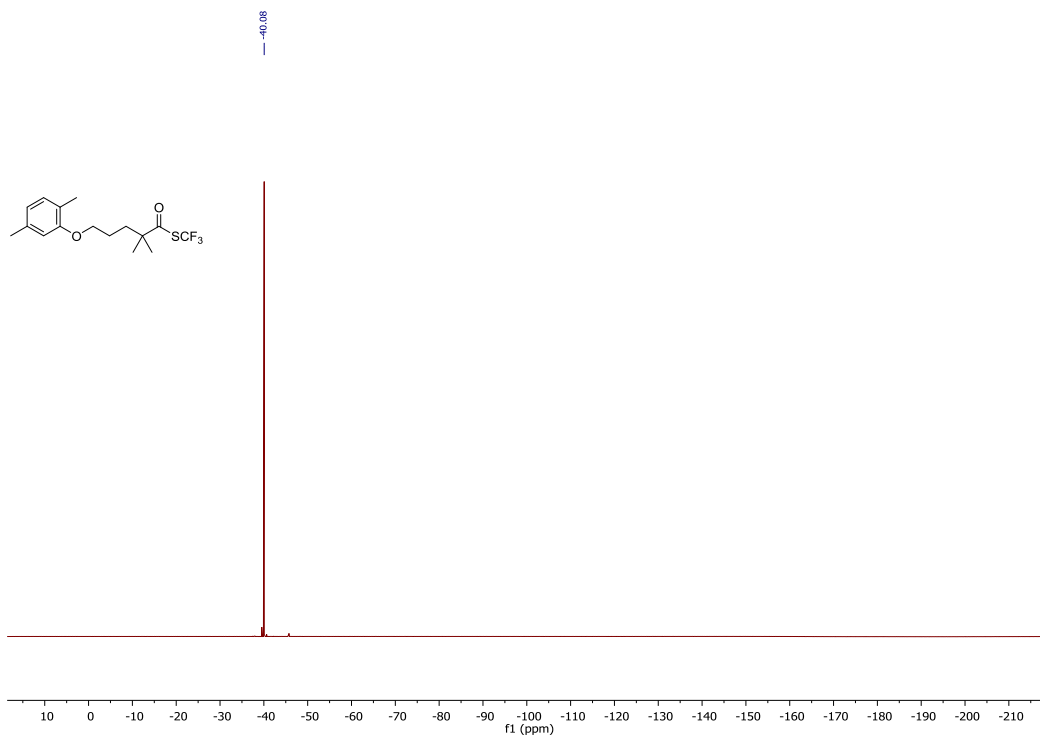

**Figure S49. NMR spectra of 6l**

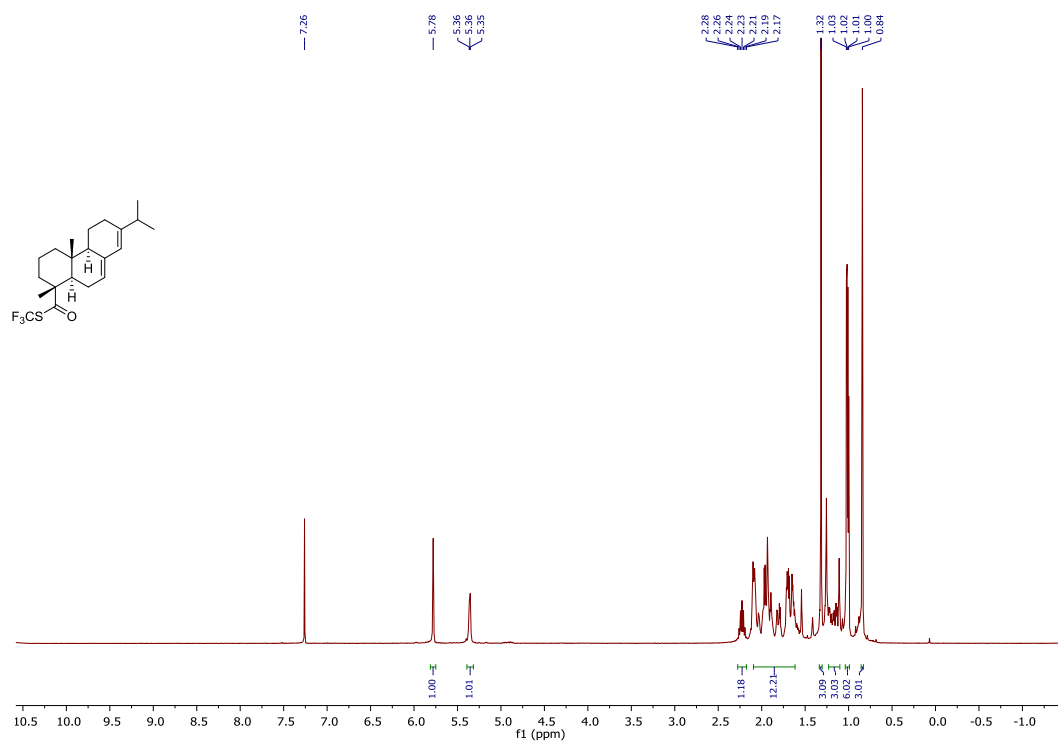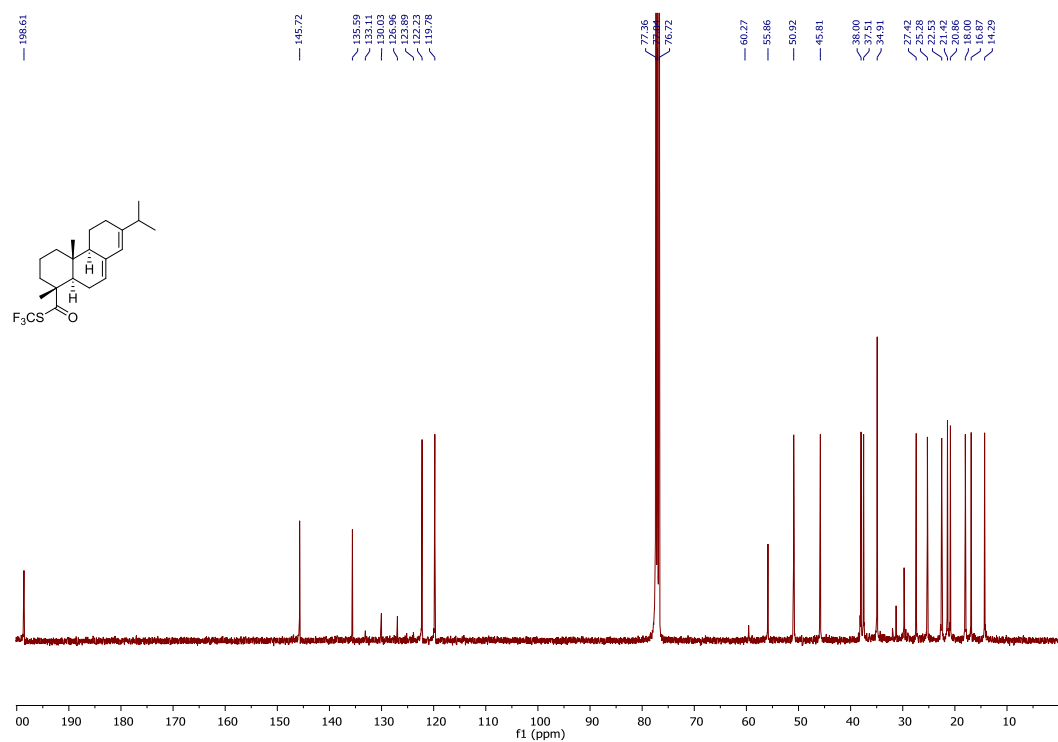

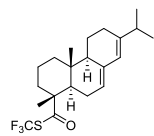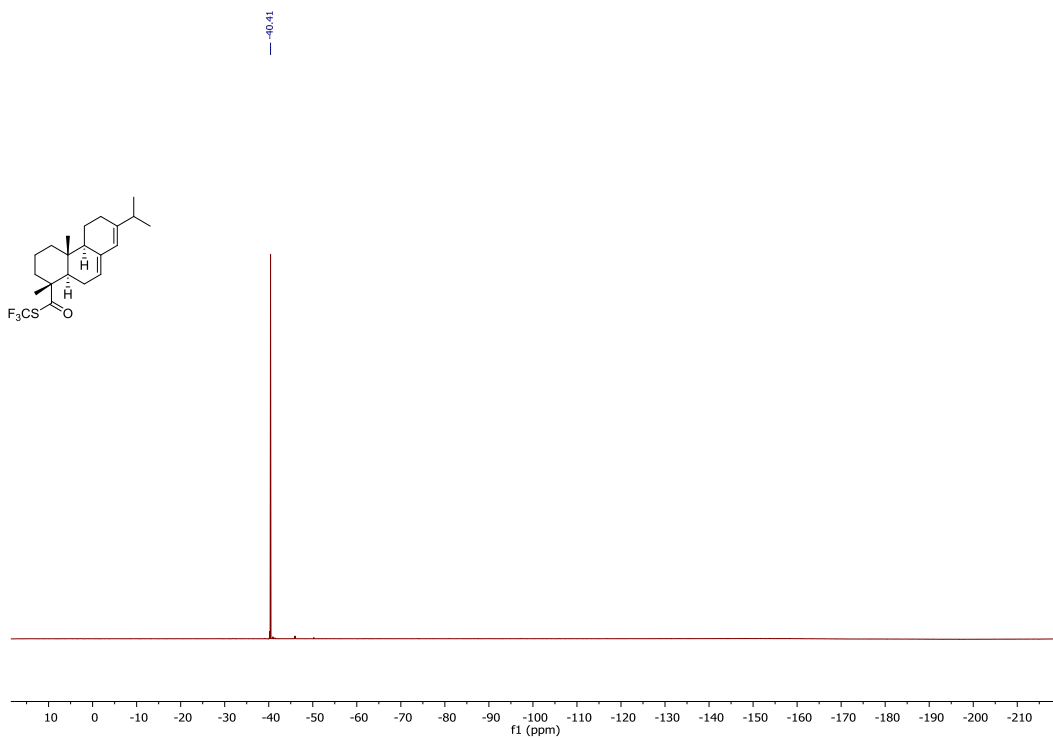

Figure S50. NMR spectra of 7a

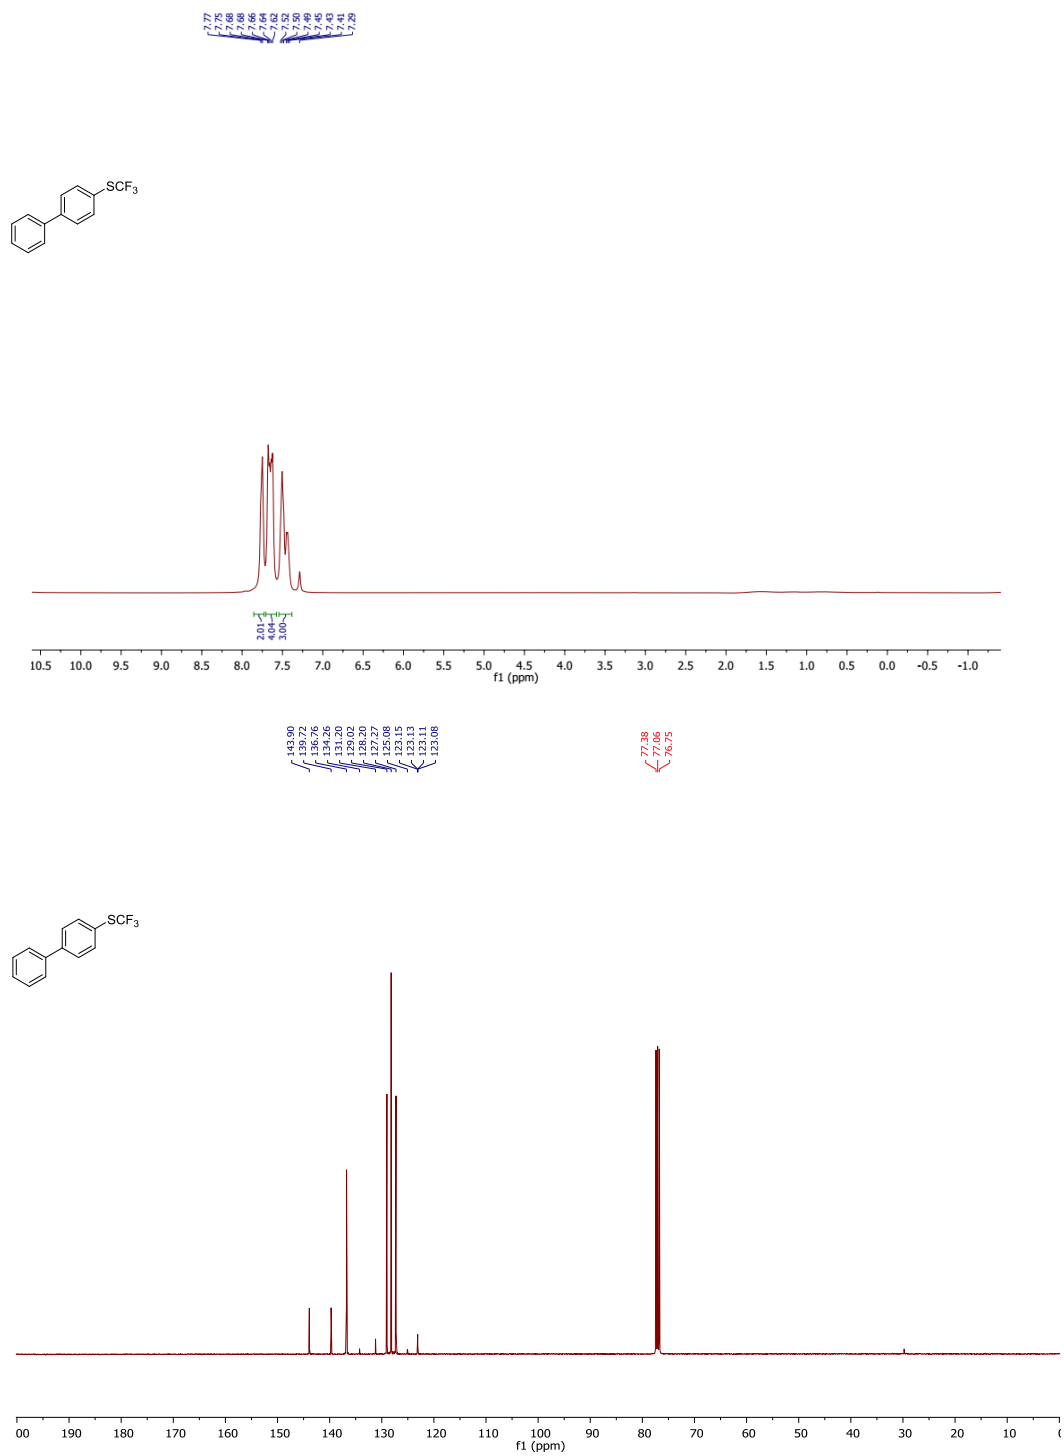

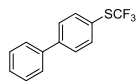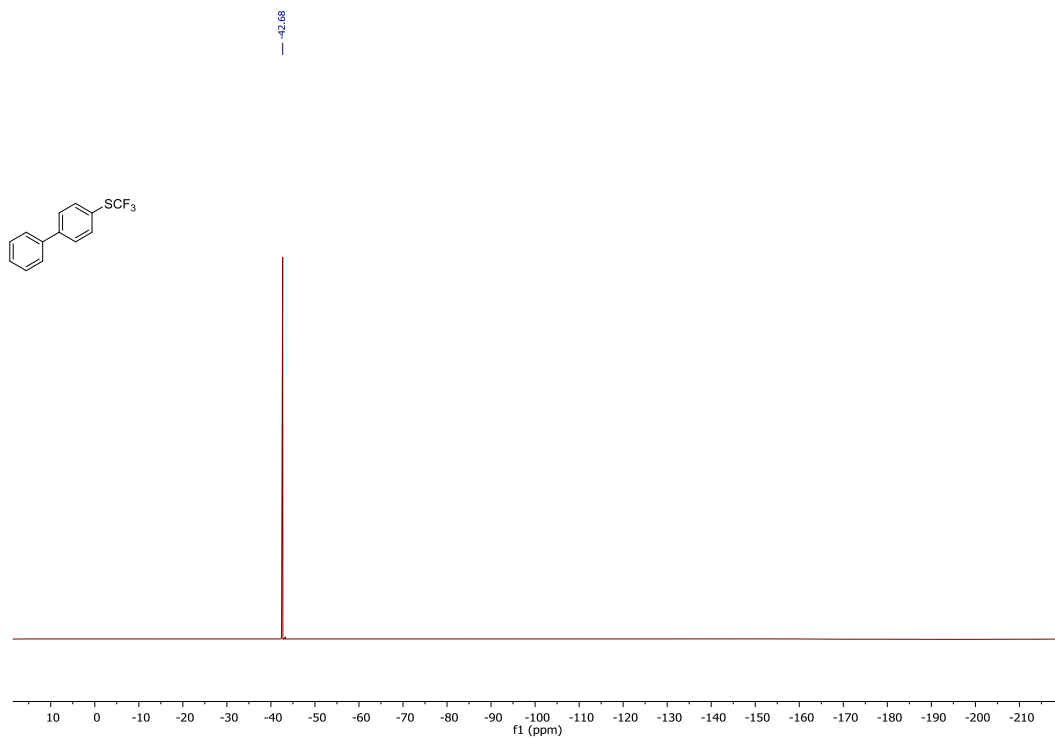

**Figure S51.**  $^{31}\text{P}$  NMR study of reaction

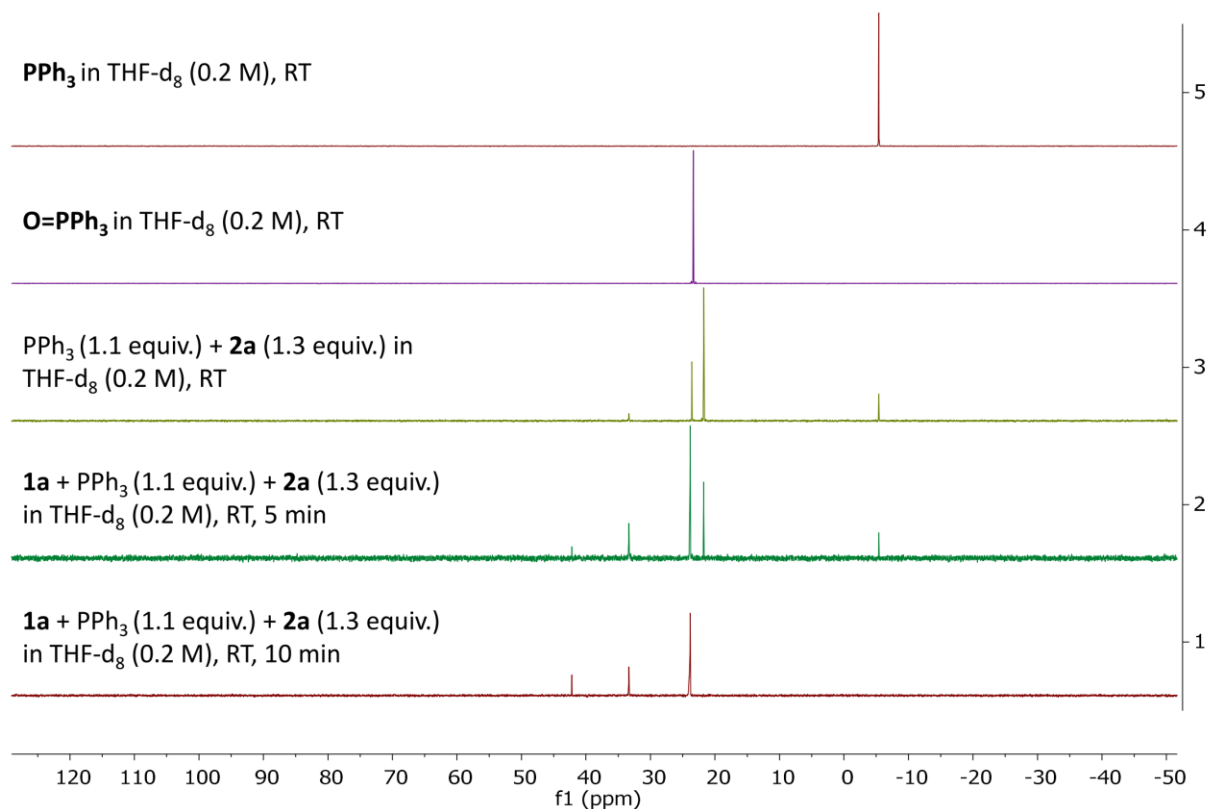

To probe the presence of different P species during the reaction,  $^{31}\text{P}$  spectra of various species and the reaction mixture were collected. Addition of *N*-(Trifluoromethylthio)phthalimide (**2a**) to a solution of  $\text{PPh}_3$  in  $\text{THF-d}_8$  at room temperature led to the formation of a species with a  $^{31}\text{P}$  signal at  $\delta = 21.8$ . This peak was tentatively assigned to trifluoromethylthiophosphonium ion **II**. When **2a** was added to a mixture of  $\text{PPh}_3$  and 4-Phenylbenzoic acid (**1a**), new signals appeared at  $\delta = 33.3$ , 42.2 and 23.3 (triphenylphosphine oxide) while the  $^{31}\text{P}$  signal at  $\delta = 21.8$  decayed. The peaks at  $\delta = 33.3$  and 42.2 are tentatively assigned to the acyloxyphosphonium intermediates including **III**.

## References

1. Fulmer, G. R.; Miller, A. J. M.; Sherden, N. H.; Gottlieb, H. E.; Nudelman, A.; Stoltz, B. M.; Bercaw, J. E.; Goldberg, K. I. *Organometallics* **2010**, *29*, 2176.
2. Mukherjee, S.; Patra, T.; Glorius, F. *ACS Catalysis* **2018**, *8*, 5842.
3. Zhang, M.; Chen, J.; Chen, Z.; Weng, Z. *Tetrahedron* **2016**, *72*, 3525.
